# Supplementary material for: Selection of Filtering and Image Texture Analysis in the Radiographic Images Processing of Horses’ Incisor Teeth Affected by the EOTRH Syndrome
Source: MDPI journal article supplement (doi:10.3390/s22082920), 2022-04-11
Supplement: s1 [file s1]

# **Selection of Filtration and Image Texture Analysis in the Radiographic Images Processing of Horses' Incisor Teeth Affected by the EOTRH Syndrome**

**Kamil Górski <sup>1</sup>, Marta Borowska <sup>2</sup>, Elżbieta Stefanik <sup>1</sup>, Izabela Polkowska <sup>3</sup>, Bernard Turek <sup>1</sup>, Andrzej Bereznowski <sup>4</sup> and Małgorzata Domino <sup>1,\*</sup>**

<sup>1</sup> Department of Large Animal Diseases and Clinic, Institute of Veterinary Medicine, Warsaw University of Life Sciences, 02-787 Warsaw, Poland; kamil\_gorski@sggw.edu.pl (K.G.)

<sup>2</sup> Institute of Biomedical Engineering, Faculty of Mechanical Engineering, Białystok University of Technology, 15-351 Białystok, Poland; m.borowska@pb.edu.pl (M.B.)

<sup>3</sup> Department and Clinic of Animal Surgery, Faculty of Veterinary Medicine, University of Life Sciences in Lublin, Poland (I.P.)

<sup>4</sup> Department of Veterinary Epidemiology and Economics, Faculty of Veterinary Medicine, Warsaw University of Life Sciences, Poland (A.B.)

\* Correspondence: malgorzata\_domino@sggw.edu.pl (M.D.)



**Table S1.** The values (mean  $\pm$ SD) of features of *First Order Statistics* (FOS) of output images, filtrated by *Mean* filter, compared between four classes (0-3) of the Equine Odontoclastic Tooth Resorption and Hypercementosis (EOTRH) syndrome. When features differed significantly ( $p < 0.05$ ).

| Feature                   | EOTRH | 0         | 1        | 2        | 3        |
|---------------------------|-------|-----------|----------|----------|----------|
| <b>Mean</b>               | Mean  | 183.8     | 187.4    | 183.3    | 183.4    |
|                           | SD    | 16.5      | 14.4     | 14.4     | 15.8     |
|                           | p     | 0.0691    | a        | a        | a        |
| <b>Median</b>             | Mean  | 183.6     | 189.8    | 185.9    | 186.7    |
|                           | SD    | 16.2      | 15.0     | 15.3     | 16.7     |
|                           | p     | 0.0134    | a        | b        | ab       |
| <b>Minimum</b>            | Mean  | 126.8     | 120.9    | 115.2    | 104.3    |
|                           | SD    | 20.2      | 18.1     | 17.0     | 22.5     |
|                           | p     | < 0.0001  | a        | b        | bc       |
| <b>Maximum</b>            | Mean  | 238.5     | 237.5    | 232.8    | 235.7    |
|                           | SD    | 14.3      | 12.0     | 13.2     | 12.2     |
|                           | p     | 0.0011    | a        | a        | b        |
| <b>10th Percentile</b>    | Mean  | 157.5     | 158.9    | 152.8    | 147.6    |
|                           | SD    | 22.2      | 16.6     | 15.4     | 21.7     |
|                           | p     | 0.0004    | ab       | a        | bc       |
| <b>90th Percentile</b>    | Mean  | 209.6     | 211.3    | 208.9    | 213.5    |
|                           | SD    | 13.7      | 13.9     | 14.2     | 14.0     |
|                           | p     | 0.283     | a        | a        | a        |
| <b>Variance</b>           | Mean  | 459.8     | 446.2    | 488.8    | 689.2    |
|                           | SD    | 488.4     | 179.6    | 170.6    | 387.6    |
|                           | p     | < 0.0001  | a        | ab       | b        |
| <b>RMS</b>                | Mean  | 185.1     | 188.6    | 184.6    | 185.3    |
|                           | SD    | 15.2      | 14.2     | 14.3     | 15.2     |
|                           | p     | 0.0544    | a        | a        | a        |
| <b>Kurtosis</b>           | Mean  | 2.93      | 3.33     | 2.96     | 2.98     |
|                           | SD    | 0.60      | 0.73     | 0.61     | 0.59     |
|                           | p     | < 0.0001  | a        | b        | a        |
| <b>Skewness</b>           | Mean  | 0.02      | -0.42    | -0.43    | -0.54    |
|                           | SD    | 0.33      | 0.44     | 0.39     | 0.30     |
|                           | p     | < 0.0001  | a        | b        | b        |
| <b>Uniformity</b>         | Mean  | 0.34      | 0.35     | 0.32     | 0.29     |
|                           | SD    | 0.06      | 0.06     | 0.05     | 0.07     |
|                           | p     | < 0.0001  | ab       | a        | bc       |
| <b>Range</b>              | Mean  | 111.7     | 116.6    | 117.6    | 131.5    |
|                           | SD    | 21.3      | 16.7     | 17.5     | 25.2     |
|                           | p     | < 0.0001  | a        | b        | c        |
| <b>Interquartile Rang</b> | Mean  | 28.9      | 26.5     | 30.0     | 35.6     |
|                           | SD    | 13.3      | 7.1      | 6.8      | 11.6     |
|                           | p     | < 0.0001  | ab       | a        | bc       |
| <b>MAD</b>                | Mean  | 16.6      | 16.4     | 17.6     | 20.6     |
|                           | SD    | 5.6       | 3.3      | 3.2      | 5.9      |
|                           | p     | < 0.0001  | a        | a        | b        |
| <b>rMAD</b>               | Mean  | 12.0      | 11.3     | 12.7     | 15.0     |
|                           | SD    | 4.9       | 2.8      | 2.7      | 4.8      |
|                           | p     | < 0.0001  | a        | a        | b        |
| <b>Energy</b>             | Mean  | 81770000  | 65610000 | 76920000 | 70650000 |
|                           | SD    | 126100000 | 40780000 | 50430000 | 33470000 |
|                           | p     | 0.0029    | a        | b        | a        |
| <b>Total Energy</b>       | Mean  | 81770000  | 65610000 | 76920000 | 70650000 |
|                           | SD    | 126100000 | 40780000 | 50430000 | 33470000 |
|                           | p     | 0.0029    | a        | b        | a        |
| <b>Entropy</b>            | Mean  | 1.78      | 1.79     | 1.86     | 2.02     |
|                           | SD    | 0.25      | 0.22     | 0.21     | 0.32     |
|                           | p     | < 0.0001  | a        | a        | ab       |

RMS - root mean squared; MAD - mean absolute deviation; rMAD - robust mean absolute deviation. Lower case letters (a-c) indicate differences between classes for  $p < 0.05$  independently for each feature.



**Table S2.** The values (mean  $\pm$ SD) of features of *First Order Statistics* (FOS) of output images, filtrated by *Median* filter, compared between four classes (0-3) of the Equine Odontoclastic Tooth Resorption and Hypercementosis (EOTRH) syndrome. When features differed significantly ( $p < 0.05$ ).

| Feature                   | EOTRH | 0         | 1        | 2        | 3        |
|---------------------------|-------|-----------|----------|----------|----------|
| <b>Mean</b>               | Mean  | 184.4     | 188.3    | 184.1    | 184.1    |
|                           | SD    | 16.5      | 14.5     | 14.5     | 15.9     |
|                           | p     | 0.0507    | a        | a        | a        |
| <b>Median</b>             | Mean  | 184.3     | 190.7    | 186.7    | 187.7    |
|                           | SD    | 16.3      | 15.1     | 15.4     | 16.7     |
|                           | p     | 0.0113    | a        | b        | ab       |
| <b>Minimum</b>            | Mean  | 125.8     | 120.8    | 114.9    | 104.2    |
|                           | SD    | 20.3      | 18.4     | 16.9     | 23.2     |
|                           | p     | < 0.0001  | a        | b        | c        |
| <b>Maximum</b>            | Mean  | 241.2     | 239.7    | 235.6    | 238.8    |
|                           | SD    | 14.6      | 12.1     | 13.5     | 12.5     |
|                           | p     | 0.0018    | a        | ab       | ab       |
| <b>10th Percentile</b>    | Mean  | 157.3     | 159.5    | 153.5    | 147.7    |
|                           | SD    | 22.3      | 17.0     | 15.9     | 22.4     |
|                           | p     | 0.0006    | ab       | a        | bc       |
| <b>90th Percentile</b>    | Mean  | 210.9     | 212.3    | 210.1    | 214.6    |
|                           | SD    | 13.5      | 13.9     | 14.4     | 14.1     |
|                           | p     | 0.3422    |          |          |          |
| <b>Variance</b>           | Mean  | 489.3     | 459.5    | 504.2    | 718.5    |
|                           | SD    | 493.8     | 188.8    | 176.1    | 412.9    |
|                           | p     | < 0.0001  | a        | a        | b        |
| <b>RMS</b>                | Mean  | 185.9     | 189.5    | 185.5    | 186.1    |
|                           | SD    | 15.1      | 14.3     | 14.4     | 15.2     |
|                           | p     | 0.0548    |          |          |          |
| <b>Kurtosis</b>           | Mean  | 2.94      | 3.39     | 3.02     | 3.04     |
|                           | SD    | 0.64      | 0.83     | 0.67     | 0.63     |
|                           | p     | < 0.0001  | a        | b        | a        |
| <b>Skewness</b>           | Mean  | 0.03      | -0.41    | -0.41    | -0.55    |
|                           | SD    | 0.34      | 0.47     | 0.41     | 0.31     |
|                           | p     | < 0.0001  | a        | b        | c        |
| <b>Uniformity</b>         | Mean  | 0.33      | 0.35     | 0.32     | 0.29     |
|                           | SD    | 0.06      | 0.06     | 0.05     | 0.07     |
|                           | p     | < 0.0001  | ab       | a        | bc       |
| <b>Range</b>              | Mean  | 115.4     | 118.9    | 120.6    | 134.6    |
|                           | SD    | 21.9      | 17.3     | 17.5     | 27.0     |
|                           | p     | < 0.0001  | a        | a        | b        |
| <b>Interquartile Rang</b> | Mean  | 30.0      | 26.8     | 30.5     | 36.1     |
|                           | SD    | 13.4      | 7.3      | 7.1      | 12.5     |
|                           | p     | < 0.0001  | ab       | a        | bc       |
| <b>MAD</b>                | Mean  | 17.2      | 16.6     | 17.9     | 21.0     |
|                           | SD    | 5.6       | 3.4      | 3.3      | 6.2      |
|                           | p     | < 0.0001  | ab       | a        | bc       |
| <b>rMAD</b>               | Mean  | 12.5      | 11.5     | 12.8     | 15.3     |
|                           | SD    | 4.9       | 2.9      | 2.8      | 5.0      |
|                           | p     | < 0.0001  | ab       | a        | bc       |
| <b>Energy</b>             | Mean  | 82490000  | 66230000 | 77530000 | 71240000 |
|                           | SD    | 128000000 | 41010000 | 50650000 | 33670000 |
|                           | p     | 0.0034    | ab       | a        | b        |
| <b>Total Energy</b>       | Mean  | 82490000  | 66230000 | 77530000 | 71240000 |
|                           | SD    | 128000000 | 41010000 | 50650000 | 33670000 |
|                           | p     | 0.0034    | ab       | a        | b        |
| <b>Entropy</b>            | Mean  | 1.82      | 1.81     | 1.88     | 2.04     |
|                           | SD    | 0.25      | 0.22     | 0.21     | 0.33     |
|                           | p     | < 0.0001  | ab       | a        | bc       |

RMS - root mean squared; MAD - mean absolute deviation; rMAD - robust mean absolute deviation. Lower case letters (a-c) indicate differences between classes for  $p < 0.05$  independently for each feature.



**Table S3.** The values (mean  $\pm$ SD) of features of *First Order Statistics* (FOS) of output images, filtrated by *Normalize* filter, compared between four classes (0-3) of the Equine Odontoclastic Tooth Resorption and Hypercementosis (EOTRH) syndrome. When features differed significantly ( $p < 0.05$ ).

| Feature                   | EOTRH | 0        | 1     | 2     | 3     |
|---------------------------|-------|----------|-------|-------|-------|
| <b>Mean</b>               | Mean  | 1.28     | 1.31  | 1.25  | 1.21  |
|                           | SD    | 0.18     | 0.20  | 0.17  | 0.19  |
|                           | p     | < 0.0001 | ab    | a     | bc    |
| <b>Median</b>             | Mean  | 1.28     | 1.35  | 1.29  | 1.26  |
|                           | SD    | 0.18     | 0.20  | 0.18  | 0.19  |
|                           | p     | < 0.0001 | a     | b     | a     |
| <b>Minimum</b>            | Mean  | 0.27     | 0.19  | 0.06  | -0.16 |
|                           | SD    | 0.26     | 0.30  | 0.30  | 0.42  |
|                           | p     | < 0.0001 | a     | a     | b     |
| <b>Maximum</b>            | Mean  | 2.21     | 2.20  | 2.17  | 2.14  |
|                           | SD    | 0.13     | 0.18  | 0.17  | 0.20  |
|                           | p     | 0.1612   | a     | a     | a     |
| <b>10th Percentile</b>    | Mean  | 0.84     | 0.86  | 0.76  | 0.64  |
|                           | SD    | 0.28     | 0.25  | 0.21  | 0.32  |
|                           | p     | < 0.0001 | a     | a     | b     |
| <b>90th Percentile</b>    | Mean  | 1.70     | 1.70  | 1.67  | 1.69  |
|                           | SD    | 0.11     | 0.18  | 0.14  | 0.16  |
|                           | p     | 0.0764   | a     | a     | a     |
| <b>Variance</b>           | Mean  | 0.12     | 0.12  | 0.13  | 0.18  |
|                           | SD    | 0.09     | 0.05  | 0.04  | 0.11  |
|                           | p     | < 0.0001 | a     | a     | b     |
| <b>RMS</b>                | Mean  | 1.33     | 1.36  | 1.30  | 1.28  |
|                           | SD    | 0.12     | 0.18  | 0.15  | 0.16  |
|                           | p     | 0.0622   | a     | a     | a     |
| <b>Kurtosis</b>           | Mean  | 2.96     | 3.40  | 3.11  | 3.10  |
|                           | SD    | 0.57     | 0.74  | 0.61  | 0.58  |
|                           | p     | < 0.0001 | a     | b     | a     |
| <b>Skewness</b>           | Mean  | 0.01     | -0.37 | -0.38 | -0.53 |
|                           | SD    | 0.29     | 0.43  | 0.39  | 0.28  |
|                           | p     | < 0.0001 | a     | b     | c     |
| <b>Uniformity</b>         | Mean  | 1.00     | 1.00  | 1.00  | 0.97  |
|                           | SD    | 0.05     | 0.03  | 0.01  | 0.05  |
|                           | p     | < 0.0001 | a     | b     | c     |
| <b>Range</b>              | Mean  | 1.94     | 2.01  | 2.11  | 2.30  |
|                           | SD    | 0.31     | 0.30  | 0.30  | 0.49  |
|                           | p     | < 0.0001 | a     | ab    | b     |
| <b>Interquartile Rang</b> | Mean  | 0.47     | 0.43  | 0.49  | 0.57  |
|                           | SD    | 0.18     | 0.11  | 0.10  | 0.20  |
|                           | p     | < 0.0001 | ab    | a     | bc    |
| <b>MAD</b>                | Mean  | 0.27     | 0.26  | 0.29  | 0.33  |
|                           | SD    | 0.08     | 0.05  | 0.05  | 0.10  |
|                           | p     | < 0.0001 | a     | a     | b     |
| <b>rMAD</b>               | Mean  | 0.20     | 0.18  | 0.20  | 0.24  |
|                           | SD    | 0.07     | 0.04  | 0.04  | 0.08  |
|                           | p     | < 0.0001 | a     | a     | ab    |
| <b>Energy</b>             | Mean  | 4427     | 3267  | 3662  | 3330  |
|                           | SD    | 9343     | 1781  | 2006  | 1417  |
|                           | p     | 0.0599   |       |       |       |
| <b>Total Energy</b>       | Mean  | 4427     | 3267  | 3662  | 3330  |
|                           | SD    | 9343     | 1781  | 2006  | 1417  |
|                           | p     | 0.0599   | a     | a     | a     |
| <b>Entropy</b>            | Mean  | 0.01     | 0.02  | 0.02  | 0.09  |
|                           | SD    | 0.10     | 0.07  | 0.04  | 0.14  |
|                           | p     | < 0.0001 | a     | b     | b     |

RMS - root mean squared; MAD - mean absolute deviation; rMAD - robust mean absolute deviation. Lower case letters (a-c) indicate differences between classes for  $p < 0.05$  independently for each feature.



**Table S4.** The values (mean  $\pm$ SD) of features of *First Order Statistics* (FOS) of output images, filtrated by *Bilateral* filter, compared between four classes (0-3) of the Equine Odontoclastic Tooth Resorption and Hypercementosis (EOTRH) syndrome. When features differed significantly ( $p < 0.05$ ).

| Feature                   | EOTRH | 0        | 1        | 2        | 3        |
|---------------------------|-------|----------|----------|----------|----------|
| <b>Mean</b>               | Mean  | 182.1    | 184.2    | 180.7    | 181.5    |
|                           | SD    | 13.9     | 14.2     | 14.3     | 15.7     |
|                           | p     | 0.1226   | a        | a        | a        |
| <b>Median</b>             | Mean  | 181.3    | 186.0    | 182.9    | 184.3    |
|                           | SD    | 14.2     | 14.8     | 15.0     | 16.9     |
|                           | p     | 0.0578   | a        | a        | a        |
| <b>Minimum</b>            | Mean  | 141.6    | 130.8    | 125.4    | 117.1    |
|                           | SD    | 14.56    | 16.19    | 15.5     | 19.06    |
|                           | p     | < 0.0001 | a        | b        | bc       |
| <b>Maximum</b>            | Mean  | 218.4    | 218.3    | 214.8    | 219.0    |
|                           | SD    | 14.9     | 12.6     | 13.4     | 12.6     |
|                           | p     | 0.0386   | a        | ab       | b        |
| <b>10th Percentile</b>    | Mean  | 163.8    | 161.7    | 156.8    | 152.1    |
|                           | SD    | 14.9     | 16.2     | 15.0     | 20.0     |
|                           | p     | 0.0001   | a        | ab       | bc       |
| <b>90th Percentile</b>    | Mean  | 202.9    | 204.4    | 201.5    | 206.1    |
|                           | SD    | 14.3     | 14.3     | 14.9     | 14.2     |
|                           | p     | 0.2658   | a        | a        | a        |
| <b>Variance</b>           | Mean  | 231.7    | 285.6    | 308.4    | 464.2    |
|                           | SD    | 103.7    | 135.3    | 130.8    | 279.6    |
|                           | p     | < 0.0001 | a        | b        | c        |
| <b>RMS</b>                | Mean  | 182.8    | 185.0    | 181.6    | 182.8    |
|                           | SD    | 13.8     | 14.1     | 14.3     | 15.3     |
|                           | p     | 0.1445   | a        | a        | a        |
| <b>Kurtosis</b>           | Mean  | 3.04     | 3.44     | 3.13     | 3.12     |
|                           | SD    | 0.69     | 0.92     | 0.83     | 0.87     |
|                           | p     | < 0.0001 | a        | b        | a        |
| <b>Skewness</b>           | Mean  | 0.15     | -0.45    | -0.47    | -0.60    |
|                           | SD    | 0.44     | 0.55     | 0.48     | 0.44     |
|                           | p     | < 0.0001 | a        | b        | b        |
| <b>Uniformity</b>         | Mean  | 0.44     | 0.42     | 0.40     | 0.36     |
|                           | SD    | 0.09     | 0.08     | 0.07     | 0.08     |
|                           | p     | < 0.0001 | a        | ab       | b        |
| <b>Range</b>              | Mean  | 76.8     | 87.5     | 89.4     | 101.8    |
|                           | SD    | 14.4     | 15.2     | 16.2     | 18.8     |
|                           | p     | < 0.0001 | a        | b        | c        |
| <b>Interquartile Rang</b> | Mean  | 19.2     | 20.1     | 23.0     | 29.2     |
|                           | SD    | 6.6      | 6.7      | 6.7      | 10.9     |
|                           | p     | < 0.0001 | a        | b        | c        |
| <b>MAD</b>                | Mean  | 11.8     | 12.9     | 13.8     | 16.9     |
|                           | SD    | 2.9      | 3.1      | 3.1      | 5.2      |
|                           | p     | < 0.0001 | a        | b        | c        |
| <b>rMAD</b>               | Mean  | 8.32     | 8.78     | 9.88     | 12.30    |
|                           | SD    | 2.61     | 2.62     | 2.59     | 4.37     |
|                           | p     | < 0.0001 | a        | a        | b        |
| <b>Energy</b>             | Mean  | 68010000 | 63340000 | 74660000 | 68780000 |
|                           | SD    | 38490000 | 40020000 | 49660000 | 32860000 |
|                           | p     | 0.0022   | a        | b        | a        |
| <b>Total Energy</b>       | Mean  | 68010000 | 63340000 | 74660000 | 68780000 |
|                           | SD    | 38490000 | 40020000 | 49660000 | 32860000 |
|                           | p     | 0.0022   | a        | b        | a        |
| <b>Entropy</b>            | Mean  | 1.41     | 1.51     | 1.55     | 1.73     |
|                           | SD    | 0.24     | 0.25     | 0.24     | 0.32     |
|                           | p     | < 0.0001 | a        | b        | b        |

RMS - root mean squared; MAD - mean absolute deviation; rMAD - robust mean absolute deviation. Lower case letters (a-c) indicate differences between classes for  $p < 0.05$  independently for each feature.



**Table S5.** The values (mean  $\pm$ SD) of features of *First Order Statistics* (FOS) of output images, filtrated by *Binomial* filter, compared between four classes (0-3) of the Equine Odontoclastic Tooth Resorption and Hypercementosis (EOTRH) syndrome. When features differed significantly ( $p < 0.05$ ).

| Feature                   | EOTRH | 0        | 1        | 2        | 3        |
|---------------------------|-------|----------|----------|----------|----------|
| <b>Mean</b>               | Mean  | 184.7    | 187.5    | 183.4    | 183.5    |
|                           | SD    | 13.73    | 14.39    | 14.42    | 15.8     |
|                           | p     | 0.0576   | a        | a        | a        |
| <b>Median</b>             | Mean  | 184.6    | 189.9    | 186.1    | 186.9    |
|                           | SD    | 13.58    | 14.92    | 15.33    | 16.56    |
|                           | p     | 0.0175   | a        | b        | ab       |
| <b>Minimum</b>            | Mean  | 126.5    | 120.3    | 114      | 102.7    |
|                           | SD    | 16.23    | 18.22    | 17.5     | 24.16    |
|                           | p     | < 0.0001 | a        | b        | c        |
| <b>Maximum</b>            | Mean  | 239.9    | 239      | 234.5    | 237.3    |
|                           | SD    | 13.8     | 11.68    | 13       | 12.1     |
|                           | p     | 0.0014   | a        | b        | ab       |
| <b>10th Percentile</b>    | Mean  | 158.6    | 158.7    | 152.7    | 147.3    |
|                           | SD    | 16.49    | 16.67    | 15.54    | 21.97    |
|                           | p     | 0.0003   | ab       | a        | bc       |
| <b>90th Percentile</b>    | Mean  | 210.3    | 211.6    | 209.3    | 213.9    |
|                           | SD    | 13.6     | 13.88    | 14.2     | 13.96    |
|                           | p     | 0.3007   | a        | a        | a        |
| <b>Variance</b>           | Mean  | 430.6    | 456.1    | 500.7    | 709.2    |
|                           | SD    | 161.5    | 183.6    | 173      | 402.6    |
|                           | p     | < 0.0001 | a        | ab       | b        |
| <b>RMS</b>                | Mean  | 185.9    | 188.7    | 184.8    | 185.4    |
|                           | SD    | 13.53    | 14.2     | 14.29    | 15.17    |
|                           | p     | 0.054    | a        | a        | a        |
| <b>Kurtosis</b>           | Mean  | 2.94     | 3.326    | 2.974    | 2.993    |
|                           | SD    | 0.5889   | 0.7297   | 0.597    | 0.5913   |
|                           | p     | < 0.0001 | a        | b        | a        |
| <b>Skewness</b>           | Mean  | 0.0197   | -0.4008  | -0.4153  | -0.538   |
|                           | SD    | 0.323    | 0.4414   | 0.3854   | 0.297    |
|                           | p     | < 0.0001 | a        | b        | bc       |
| <b>Uniformity</b>         | Mean  | 0.3366   | 0.346    | 0.3185   | 0.29     |
|                           | SD    | 0.05577  | 0.06035  | 0.05026  | 0.06667  |
|                           | p     | < 0.0001 | ab       | a        | bc       |
| <b>Range</b>              | Mean  | 113.4    | 118.7    | 120.5    | 134.6    |
|                           | SD    | 16.54    | 16.84    | 17.97    | 27.22    |
|                           | p     | < 0.0001 | a        | b        | b        |
| <b>Interquartile Rang</b> | Mean  | 28.4     | 26.82    | 30.34    | 36.09    |
|                           | SD    | 7.355    | 7.161    | 6.73     | 12.03    |
|                           | p     | < 0.0001 | ab       | a        | bc       |
| <b>MAD</b>                | Mean  | 16.47    | 16.57    | 17.83    | 20.91    |
|                           | SD    | 3.377    | 3.351    | 3.213    | 6.056    |
|                           | p     | < 0.0001 | a        | a        | b        |
| <b>rMAD</b>               | Mean  | 11.86    | 11.46    | 12.8     | 15.19    |
|                           | SD    | 2.917    | 2.835    | 2.688    | 4.909    |
|                           | p     | < 0.0001 | a        | a        | b        |
| <b>Energy</b>             | Mean  | 70140000 | 65710000 | 77000000 | 70740000 |
|                           | SD    | 38980000 | 40800000 | 50420000 | 33470000 |
|                           | p     | 0.0035   | ab       | a        | b        |
| <b>Total Energy</b>       | Mean  | 70140000 | 65710000 | 77000000 | 70740000 |
|                           | SD    | 38980000 | 40800000 | 50420000 | 33470000 |
|                           | p     | 0.0035   | ab       | a        | bc       |
| <b>Entropy</b>            | Mean  | 1.797    | 1.804    | 1.879    | 2.033    |
|                           | SD    | 0.2208   | 0.2201   | 0.2094   | 0.3277   |
|                           | p     | < 0.0001 | ab       | a        | bc       |

RMS - root mean squared; MAD - mean absolute deviation; rMAD - robust mean absolute deviation. Lower case letters (a-c) indicate differences between classes for  $p < 0.05$  independently for each feature.



**Table S6.** The values (mean  $\pm$ SD) of features of *First Order Statistics* (FOS) of output images, filtrated by *CurvatureFlow* filter, compared between four classes (0-3) of the Equine Odontoclastic Tooth Resorption and Hypercementosis (EOTRH) syndrome. When features differed significantly ( $p < 0.05$ ).

| Feature                   | EOTRH | 0        | 1        | 2        | 3        |
|---------------------------|-------|----------|----------|----------|----------|
| <b>Mean</b>               | Mean  | 185.5    | 188.4    | 184.2    | 184.2    |
|                           | SD    | 13.7     | 14.5     | 14.5     | 15.8     |
|                           | p     | 0.0713   | a        | a        | a        |
| <b>Median</b>             | Mean  | 185.4    | 190.7    | 186.8    | 187.9    |
|                           | SD    | 13.6     | 15.1     | 15.4     | 16.5     |
|                           | p     | 0.0191   | a        | b        | ab       |
| <b>Minimum</b>            | Mean  | 121.9    | 116.8    | 109.9    | 97.8     |
|                           | SD    | 16.5     | 18.3     | 18.6     | 26.0     |
|                           | p     | < 0.0001 | a        | b        | b        |
| <b>Maximum</b>            | Mean  | 245.3    | 244.7    | 241.7    | 244.1    |
|                           | SD    | 12.6     | 10.7     | 13.0     | 11.7     |
|                           | p     | 0.0367   | a        | ab       | ab       |
| <b>10th Percentile</b>    | Mean  | 157.7    | 158.7    | 152.6    | 146.8    |
|                           | SD    | 16.7     | 17.0     | 15.8     | 22.6     |
|                           | p     | 0.0006   | ab       | a        | bc       |
| <b>90th Percentile</b>    | Mean  | 212.5    | 213.4    | 211.1    | 215.7    |
|                           | SD    | 13.3     | 14.0     | 14.3     | 13.9     |
|                           | p     | 0.3104   | a        | a        | a        |
| <b>Variance</b>           | Mean  | 482.9    | 493.9    | 543.9    | 771.9    |
|                           | SD    | 176.7    | 195.7    | 181.9    | 446.6    |
|                           | p     | < 0.0001 | a        | ab       | b        |
| <b>RMS</b>                | Mean  | 186.8    | 189.7    | 185.7    | 186.4    |
|                           | SD    | 13.5     | 14.3     | 14.4     | 15.1     |
|                           | p     | 0.0685   |          |          |          |
| <b>Kurtosis</b>           | Mean  | 2.95     | 3.39     | 3.08     | 3.07     |
|                           | SD    | 0.59     | 0.78     | 0.64     | 0.61     |
|                           | p     | < 0.0001 | a        | b        | a        |
| <b>Skewness</b>           | Mean  | 0.02     | -0.38    | -0.38    | -0.53    |
|                           | SD    | 0.31     | 0.45     | 0.40     | 0.30     |
|                           | p     | < 0.0001 | a        | b        | c        |
| <b>Uniformity</b>         | Mean  | 0.32     | 0.33     | 0.31     | 0.28     |
|                           | SD    | 0.05     | 0.06     | 0.05     | 0.07     |
|                           | p     | < 0.0001 | a        | a        | b        |
| <b>Range</b>              | Mean  | 123.4    | 128.0    | 131.8    | 146.3    |
|                           | SD    | 16.7     | 17.9     | 19.3     | 29.7     |
|                           | p     | < 0.0001 | a        | ab       | bc       |
| <b>Interquartile Rang</b> | Mean  | 30.2     | 27.9     | 31.5     | 37.4     |
|                           | SD    | 7.5      | 7.2      | 6.8      | 12.9     |
|                           | p     | < 0.0001 | ab       | a        | bc       |
| <b>MAD</b>                | Mean  | 17.5     | 17.2     | 18.5     | 21.7     |
|                           | SD    | 3.5      | 3.4      | 3.2      | 6.5      |
|                           | p     | < 0.0001 | ab       | a        | bc       |
| <b>rMAD</b>               | Mean  | 12.4     | 11.8     | 13.1     | 15.6     |
|                           | SD    | 3.0      | 2.9      | 2.7      | 5.2      |
|                           | p     | < 0.0001 | a        | a        | b        |
| <b>Energy</b>             | Mean  | 70730000 | 66360000 | 77690000 | 71370000 |
|                           | SD    | 39140000 | 41070000 | 50720000 | 33620000 |
|                           | p     | 0.0037   | ab       | a        | b        |
| <b>Total Energy</b>       | Mean  | 70730000 | 66360000 | 77690000 | 71370000 |
|                           | SD    | 39140000 | 41070000 | 50720000 | 33620000 |
|                           | p     | 0.0037   | ab       | a        | b        |
| <b>Entropy</b>            | Mean  | 1.87     | 1.86     | 1.94     | 2.09     |
|                           | SD    | 0.22     | 0.22     | 0.20     | 0.34     |
|                           | p     | < 0.0001 | ab       | a        | bc       |

RMS - root mean squared; MAD - mean absolute deviation; rMAD - robust mean absolute deviation. Lower case letters (a-c) indicate differences between classes for  $p < 0.05$  independently for each feature.



**Table S7.** The values (mean  $\pm$ SD) of features of *First Order Statistics* (FOS) of output images, filtrated by *LaplacianSharpening* filter, compared between four classes (0-3) of the Equine Odontoclastic Tooth Resorption and Hypercementosis (EOTRH) syndrome. When features differed significantly ( $p < 0.05$ ).

| Feature                   | EOTRH | 0        | 1        | 2        | 3        |
|---------------------------|-------|----------|----------|----------|----------|
| <b>Mean</b>               | Mean  | 185.3    | 188.8    | 184.3    | 184.0    |
|                           | SD    | 13.5     | 14.5     | 14.5     | 15.8     |
|                           | p     | 0.0542   | a        | a        | a        |
| <b>Median</b>             | Mean  | 185.7    | 191.0    | 186.9    | 188.3    |
|                           | SD    | 13.6     | 15.3     | 15.5     | 16.1     |
|                           | p     | 0.0166   | a        | b        | ab       |
| <b>Minimum</b>            | Mean  | 72.3     | 65.6     | 56.9     | 39.5     |
|                           | SD    | 22.6     | 27.5     | 25.7     | 33.2     |
|                           | p     | < 0.0001 | a        | ab       | b        |
| <b>Maximum</b>            | Mean  | 254.4    | 254.6    | 254.5    | 254.9    |
|                           | SD    | 2.1      | 2.6      | 2.2      | 0.9      |
|                           | p     | 0.1799   | a        | a        | a        |
| <b>10th Percentile</b>    | Mean  | 133.2    | 148.5    | 141.3    | 133.2    |
|                           | SD    | 27.3     | 17.8     | 17.3     | 27.3     |
|                           | p     | < 0.0001 | a        | b        | a        |
| <b>90th Percentile</b>    | Mean  | 225.6    | 226.6    | 223.6    | 228.7    |
|                           | SD    | 13.0     | 14.0     | 13.8     | 14.3     |
|                           | p     | 0.156    | a        | a        | a        |
| <b>Variance</b>           | Mean  | 992.6    | 979.5    | 1073.0   | 1496.0   |
|                           | SD    | 316.6    | 304.7    | 311.4    | 870.2    |
|                           | p     | < 0.0001 | a        | a        | ab       |
| <b>RMS</b>                | Mean  | 188.0    | 191.4    | 187.2    | 188.1    |
|                           | SD    | 12.9     | 14.1     | 14.1     | 14.4     |
|                           | p     | 0.0331   | ab       | a        | b        |
| <b>Kurtosis</b>           | Mean  | 3.05     | 3.53     | 3.38     | 3.39     |
|                           | SD    | 0.40     | 0.77     | 0.70     | 0.66     |
|                           | p     | < 0.0001 | a        | b        | b        |
| <b>Skewness</b>           | Mean  | -0.15    | -0.44    | -0.43    | -0.56    |
|                           | SD    | 0.22     | 0.35     | 0.34     | 0.27     |
|                           | p     | < 0.0001 | a        | b        | c        |
| <b>Uniformity</b>         | Mean  | 0.23     | 0.23     | 0.22     | 0.20     |
|                           | SD    | 0.04     | 0.03     | 0.03     | 0.05     |
|                           | p     | 0.0001   | ab       | a        | b        |
| <b>Range</b>              | Mean  | 182.1    | 189.0    | 197.6    | 215.3    |
|                           | SD    | 22.2     | 27.5     | 25.9     | 33.4     |
|                           | p     | < 0.0001 | a        | ab       | b        |
| <b>Interquartile Rang</b> | Mean  | 42.0     | 39.7     | 42.6     | 50.2     |
|                           | SD    | 8.3      | 7.6      | 7.4      | 17.0     |
|                           | p     | < 0.0001 | ab       | a        | b        |
| <b>MAD</b>                | Mean  | 24.9     | 24.3     | 25.7     | 29.8     |
|                           | SD    | 4.2      | 3.9      | 3.9      | 8.8      |
|                           | p     | < 0.0001 | ab       | a        | bc       |
| <b>rMAD</b>               | Mean  | 17.6     | 16.8     | 17.9     | 21.1     |
|                           | SD    | 3.3      | 3.2      | 3.0      | 6.8      |
|                           | p     | < 0.0001 | ab       | b        | bc       |
| <b>Energy</b>             | Mean  | 71520000 | 67450000 | 78860000 | 72530000 |
|                           | SD    | 39140000 | 41520000 | 51080000 | 33550000 |
|                           | p     | 0.0036   | ab       | a        | b        |
| <b>Total Energy</b>       | Mean  | 71520000 | 67450000 | 78860000 | 72530000 |
|                           | SD    | 39140000 | 41520000 | 51080000 | 33550000 |
|                           | p     | 0.0036   | ab       | a        | b        |
| <b>Entropy</b>            | Mean  | 2.38     | 2.35     | 2.42     | 2.56     |
|                           | SD    | 0.21     | 0.19     | 0.19     | 0.34     |
|                           | p     | 0.0004   | a        | a        | ab       |

RMS - root mean squared; MAD - mean absolute deviation; rMAD - robust mean absolute deviation. Lower case letters (a-c) indicate differences between classes for  $p < 0.05$  independently for each feature.



**Table S8.** The values (mean  $\pm$ SD) of features of *First Order Statistics* (FOS) of output images, filtrated by *DiscreteGaussian* filter, compared between four classes (0-3) of the Equine Odontoclastic Tooth Resorption and Hypercementosis (EOTRH) syndrome. When features differed significantly ( $p < 0.05$ ).

| Feature                   | EOTRH | 0        | 1        | 2        | 3        |
|---------------------------|-------|----------|----------|----------|----------|
| <b>Mean</b>               | Mean  | 183.9    | 186.6    | 182.5    | 182.7    |
|                           | SD    | 13.8     | 14.3     | 14.4     | 15.8     |
|                           | p     | 0.0531   | a        | a        | a        |
| <b>Median</b>             | Mean  | 183.7    | 189.0    | 185.2    | 186.0    |
|                           | SD    | 13.6     | 14.9     | 15.3     | 16.8     |
|                           | p     | 0.0173   | a        | b        | ab       |
| <b>Minimum</b>            | Mean  | 128.6    | 121.6    | 116.0    | 105.1    |
|                           | SD    | 15.9     | 17.7     | 17.0     | 22.1     |
|                           | p     | < 0.0001 | a        | b        | c        |
| <b>Maximum</b>            | Mean  | 236.2    | 235.3    | 230.6    | 233.6    |
|                           | SD    | 14.4     | 12.0     | 12.9     | 12.4     |
|                           | p     | 0.0011   | ab       | a        | b        |
| <b>10th Percentile</b>    | Mean  | 158.8    | 158.3    | 152.4    | 147.3    |
|                           | SD    | 16.3     | 16.5     | 15.4     | 21.5     |
|                           | p     | 0.0002   | a        | a        | b        |
| <b>90th Percentile</b>    | Mean  | 208.6    | 210.2    | 207.9    | 212.4    |
|                           | SD    | 13.8     | 13.8     | 14.3     | 14.0     |
|                           | p     | 0.3083   | a        | a        | a        |
| <b>Variance</b>           | Mean  | 398.4    | 435.6    | 477.2    | 670.8    |
|                           | SD    | 151.5    | 175.3    | 167.8    | 372.6    |
|                           | p     | < 0.0001 | a        | ab       | b        |
| <b>RMS</b>                | Mean  | 185.0    | 187.8    | 183.8    | 184.6    |
|                           | SD    | 13.6     | 14.2     | 14.2     | 15.2     |
|                           | p     | 0.0595   | a        | a        | a        |
| <b>Kurtosis</b>           | Mean  | 2.95     | 3.31     | 2.93     | 2.97     |
|                           | SD    | 0.60     | 0.71     | 0.59     | 0.60     |
|                           | p     | < 0.0001 | a        | b        | a        |
| <b>Skewness</b>           | Mean  | 0.02     | -0.42    | -0.43    | -0.54    |
|                           | SD    | 0.33     | 0.44     | 0.38     | 0.31     |
|                           | p     | < 0.0001 | a        | b        | b        |
| <b>Uniformity</b>         | Mean  | 0.35     | 0.35     | 0.33     | 0.30     |
|                           | SD    | 0.06     | 0.06     | 0.05     | 0.07     |
|                           | p     | < 0.0001 | a        | a        | b        |
| <b>Range</b>              | Mean  | 107.6    | 113.7    | 114.6    | 128.5    |
|                           | SD    | 16.2     | 16.1     | 16.9     | 24.4     |
|                           | p     | < 0.0001 | a        | b        | c        |
| <b>Interquartile Rang</b> | Mean  | 27.1     | 26.1     | 29.8     | 35.2     |
|                           | SD    | 7.3      | 7.1      | 6.7      | 11.6     |
|                           | p     | < 0.0001 | a        | a        | b        |
| <b>MAD</b>                | Mean  | 15.8     | 16.2     | 17.4     | 20.4     |
|                           | SD    | 3.3      | 3.3      | 3.2      | 5.8      |
|                           | p     | < 0.0001 | a        | a        | b        |
| <b>rMAD</b>               | Mean  | 11.4     | 11.2     | 12.6     | 14.8     |
|                           | SD    | 2.9      | 2.8      | 2.7      | 4.7      |
|                           | p     | < 0.0001 | a        | a        | b        |
| <b>Energy</b>             | Mean  | 69490000 | 65050000 | 76290000 | 70100000 |
|                           | SD    | 38700000 | 40490000 | 50070000 | 33300000 |
|                           | p     | 0.0034   | ab       | a        | b        |
| <b>Total Energy</b>       | Mean  | 69490000 | 65050000 | 76290000 | 70100000 |
|                           | SD    | 38700000 | 40490000 | 50070000 | 33300000 |
|                           | p     | 0.0034   | ab       | a        | b        |
| <b>Entropy</b>            | Mean  | 1.75     | 1.77     | 1.84     | 2.00     |
|                           | SD    | 0.22     | 0.22     | 0.21     | 0.32     |
|                           | p     | < 0.0001 | a        | ab       | bc       |

RMS - root mean squared; MAD - mean absolute deviation; rMAD - robust mean absolute deviation. Lower case letters (a-c) indicate differences between classes for  $p < 0.05$  independently for each feature.



**Table S9.** The values (mean  $\pm$ SD) of features of *First Order Statistics* (FOS) of output images, filtrated by *SmoothingRecursiveGaussian* filter, compared between four classes (0-3) of the Equine Odontoclastic Tooth Resorption and Hypercementosis (EOTRH) syndrome. When features differed significantly ( $p < 0.05$ ).

| Feature                   | EOTRH | 0        | 1        | 2        | 3        |
|---------------------------|-------|----------|----------|----------|----------|
| <b>Mean</b>               | Mean  | 184.9    | 187.6    | 183.5    | 183.7    |
|                           | SD    | 13.8     | 14.3     | 14.4     | 15.8     |
|                           | p     | 0.0637   | a        | a        | a        |
| <b>Median</b>             | Mean  | 184.8    | 190.0    | 186.2    | 187.0    |
|                           | SD    | 13.6     | 14.9     | 15.3     | 16.9     |
|                           | p     | 0.0184   | a        | b        | ab       |
| <b>Minimum</b>            | Mean  | 129.8    | 122.7    | 117.3    | 106.6    |
|                           | SD    | 15.8     | 17.7     | 16.9     | 21.7     |
|                           | p     | <0.0001  | a        | b        | c        |
| <b>Maximum</b>            | Mean  | 236.8    | 235.9    | 231.1    | 234.3    |
|                           | SD    | 14.6     | 12.1     | 13.0     | 12.5     |
|                           | p     | 0.0012   | a        | a        | b        |
| <b>10th Percentile</b>    | Mean  | 159.9    | 159.3    | 153.4    | 148.4    |
|                           | SD    | 16.2     | 16.5     | 15.3     | 21.5     |
|                           | p     | 0.0002   | a        | a        | b        |
| <b>90th Percentile</b>    | Mean  | 209.5    | 211.2    | 208.8    | 213.4    |
|                           | SD    | 13.9     | 13.9     | 14.3     | 14.0     |
|                           | p     | 0.2983   | a        | a        | a        |
| <b>Variance</b>           | Mean  | 396.0    | 434.4    | 475.6    | 667.7    |
|                           | SD    | 151.1    | 175.0    | 167.8    | 370.5    |
|                           | p     | <0.0001  | a        | ab       | b        |
| <b>RMS</b>                | Mean  | 186.0    | 188.7    | 184.8    | 185.5    |
|                           | SD    | 13.6     | 14.2     | 14.2     | 15.2     |
|                           | p     | 0.0596   | a        | a        | a        |
| <b>Kurtosis</b>           | Mean  | 2.94     | 3.31     | 2.93     | 2.97     |
|                           | SD    | 0.60     | 0.71     | 0.60     | 0.60     |
|                           | p     | <0.0001  | a        | b        | a        |
| <b>Skewness</b>           | Mean  | 0.02     | -0.43    | -0.43    | -0.54    |
|                           | SD    | 0.34     | 0.44     | 0.39     | 0.31     |
|                           | p     | <0.0001  | a        | b        | b        |
| <b>Uniformity</b>         | Mean  | 0.35     | 0.35     | 0.33     | 0.30     |
|                           | SD    | 0.06     | 0.06     | 0.05     | 0.07     |
|                           | p     | <0.0001  | a        | a        | b        |
| <b>Range</b>              | Mean  | 106.9    | 113.3    | 113.8    | 127.7    |
|                           | SD    | 16.2     | 16.2     | 16.9     | 23.9     |
|                           | p     | <0.0001  | a        | b        | c        |
| <b>Interquartile Rang</b> | Mean  | 27.1     | 26.1     | 29.8     | 35.1     |
|                           | SD    | 7.3      | 7.0      | 6.8      | 11.4     |
|                           | p     | <0.0001  | a        | a        | b        |
| <b>MAD</b>                | Mean  | 15.8     | 16.2     | 17.4     | 20.4     |
|                           | SD    | 3.3      | 3.3      | 3.2      | 5.7      |
|                           | p     | <0.0001  | a        | a        | b        |
| <b>rMAD</b>               | Mean  | 11.2     | 11.0     | 12.4     | 14.6     |
|                           | SD    | 2.8      | 2.8      | 2.7      | 4.7      |
|                           | p     | <0.0001  | a        | a        | b        |
| <b>Energy</b>             | Mean  | 70230000 | 65750000 | 77100000 | 70820000 |
|                           | SD    | 39090000 | 40950000 | 50590000 | 33560000 |
|                           | p     | 0.0032   | ab       | a        | b        |
| <b>Total Energy</b>       | Mean  | 70230000 | 65750000 | 77090000 | 70820000 |
|                           | SD    | 39090000 | 40950000 | 50560000 | 33560000 |
|                           | p     | 0.0032   | ab       | a        | b        |
| <b>Entropy</b>            | Mean  | 1.74     | 1.77     | 1.84     | 2.00     |
|                           | SD    | 0.22     | 0.22     | 0.21     | 0.32     |
|                           | p     | <0.0001  | a        | ab       | bc       |

RMS - root mean squared; MAD - mean absolute deviation; rMAD - robust mean absolute deviation. Lower case letters (a-c) indicate differences between classes for  $p < 0.05$  independently for each feature.



**Table S10.** The values (mean  $\pm$ SD) of features of *Gray Level Co-occurrence Matrix (GLCM)* of output images, filtrated by *Mean* filter, compared between four classes (0-3) of the Equine Odontoclastic Tooth Resorption and Hypercementosis (EOTRH) syndrome. When features differed significantly ( $p < 0.05$ ).

| Feature                    | EOTRH      | 0     | 1     | 2     | 3     | Feature                    | EOTRH      | 0     | 1     | 2     | 3     |
|----------------------------|------------|-------|-------|-------|-------|----------------------------|------------|-------|-------|-------|-------|
| <b>Autocorrelation</b>     | Mean       | 11.4  | 14.2  | 15.3  | 18.7  | <b>IDN</b>                 | Mean       | 0.90  | 0.90  | 0.90  | 0.90  |
|                            | SD         | 3.9   | 4.4   | 4.8   | 6.1   |                            | SD         | 0.02  | 0.01  | 0.02  | 0.02  |
| <b>Cluster Prominence</b>  | p < 0.0001 | a     | b     | b     | c     | <b>IMC 1</b>               | p 0.0575   | a     | a     | a     | a     |
|                            | Mean       | 26.9  | 13.3  | 15.9  | 38.1  |                            | Mean       | -0.11 | -0.11 | -0.11 | -0.11 |
| <b>Cluster Shade</b>       | SD         | 146.8 | 17.4  | 12.8  | 47.6  | <b>IMC 2</b>               | SD         | 0.05  | 0.03  | 0.04  | 0.04  |
|                            | p < 0.0001 | a     | a     | a     | b     |                            | p 0.5883   | a     | a     | a     | a     |
| <b>Cluster Tendency</b>    | Mean       | 0.77  | -0.59 | -1.06 | -2.27 | <b>Inverse Variance</b>    | Mean       | 0.53  | 0.50  | 0.52  | 0.54  |
|                            | SD         | 2.98  | 1.20  | 1.39  | 2.73  |                            | SD         | 0.10  | 0.09  | 0.10  | 0.10  |
| <b>Contrast</b>            | p < 0.0001 | a     | b     | c     | d     | <b>Joint Average</b>       | p 0.0584   | a     | a     | a     | a     |
|                            | Mean       | 2.23  | 1.87  | 2.20  | 3.26  |                            | Mean       | 0.47  | 0.46  | 0.48  | 0.47  |
| <b>Correlation</b>         | SD         | 2.82  | 0.93  | 0.90  | 2.10  | <b>Joint Energy</b>        | SD         | 0.05  | 0.04  | 0.04  | 0.04  |
|                            | p < 0.0001 | ab    | a     | b     | c     |                            | p 0.0126   | ab    | a     | b     | ab    |
| <b>Difference Average</b>  | Mean       | 0.90  | 1.00  | 1.06  | 1.35  | <b>Joint Entropy</b>       | Mean       | 3.28  | 3.70  | 3.83  | 4.22  |
|                            | SD         | 0.28  | 0.32  | 0.34  | 0.71  |                            | SD         | 0.54  | 0.58  | 0.61  | 0.68  |
| <b>Difference Entropy</b>  | p < 0.0001 | a     | b     | bc    | c     | <b>MCC</b>                 | p < 0.0001 | a     | b     | b     | c     |
|                            | Mean       | 0.36  | 0.28  | 0.33  | 0.39  |                            | Mean       | 0.15  | 0.16  | 0.13  | 0.12  |
| <b>Difference Variance</b> | SD         | 0.12  | 0.14  | 0.15  | 0.13  | <b>Sum Average</b>         | SD         | 0.05  | 0.06  | 0.04  | 0.06  |
|                            | p < 0.0001 | a     | b     | a     | a     |                            | p < 0.0001 | ab    | a     | bc    | c     |
| <b>ID</b>                  | Mean       | 0.66  | 0.69  | 0.72  | 0.81  | <b>Maximum Probability</b> | Mean       | 3.28  | 3.23  | 3.40  | 3.73  |
|                            | SD         | 0.13  | 0.13  | 0.13  | 0.25  |                            | SD         | 0.45  | 0.42  | 0.39  | 0.69  |
| <b>IDM</b>                 | p 0.0002   | a     | ab    | bc    | c     | <b>Sum Entropy</b>         | p < 0.0001 | ab    | a     | bc    | c     |
|                            | Mean       | 1.35  | 1.41  | 1.43  | 1.53  |                            | Mean       | 0.46  | 0.42  | 0.43  | 0.45  |
| <b>IDMN</b>                | SD         | 0.14  | 0.14  | 0.15  | 0.26  | <b>Sum Squares</b>         | SD         | 0.11  | 0.10  | 0.10  | 0.11  |
|                            | p < 0.0001 | a     | b     | b     | b     |                            | p 0.0155   | a     | b     | ab    | ab    |
| <b>Autocorrelation</b>     | Mean       | 0.43  | 0.49  | 0.49  | 0.60  | <b>IMC 1</b>               | Mean       | 0.25  | 0.29  | 0.24  | 0.22  |
|                            | SD         | 0.10  | 0.12  | 0.13  | 0.25  |                            | SD         | 0.08  | 0.10  | 0.07  | 0.10  |
| <b>Cluster Prominence</b>  | p < 0.0001 | a     | b     | b     | b     | <b>IMC 2</b>               | p < 0.0001 | a     | b     | a     | a     |
|                            | Mean       | 0.71  | 0.70  | 0.69  | 0.67  |                            | Mean       | 6.56  | 7.40  | 7.66  | 8.44  |
| <b>Cluster Shade</b>       | SD         | 0.04  | 0.04  | 0.04  | 0.07  | <b>Inverse Variance</b>    | SD         | 1.08  | 1.15  | 1.21  | 1.37  |
|                            | p 0.0003   | a     | ab    | bc    | c     |                            | p < 0.0001 | a     | b     | b     | c     |
| <b>Cluster Tendency</b>    | Mean       | 0.70  | 0.69  | 0.67  | 0.65  | <b>Joint Average</b>       | Mean       | 2.40  | 2.34  | 2.47  | 2.67  |
|                            | SD         | 0.05  | 0.05  | 0.05  | 0.08  |                            | SD         | 0.31  | 0.28  | 0.27  | 0.39  |
| <b>Contrast</b>            | p 0.0003   | a     | ab    | bc    | c     | <b>Joint Energy</b>        | p < 0.0001 | ab    | a     | bc    | c     |
|                            | Mean       | 0.97  | 0.97  | 0.97  | 0.97  |                            | Mean       | 0.78  | 0.72  | 0.81  | 1.15  |
| <b>Correlation</b>         | SD         | 0.01  | 0.01  | 0.01  | 0.01  | <b>Joint Entropy</b>       | SD         | 0.73  | 0.29  | 0.27  | 0.68  |
|                            | p 0.3501   | a     | a     | a     | a     |                            | p < 0.0001 | a     | a     | b     | b     |

ID - inverse difference; IDM - inverse difference moment; IDMN - inverse difference moment normalized; IDN - inverse difference normalized; IMC 1 - informational measure of correlation 1; IMC 2 - informational measure of correlation 2; MCC - maximal correlation coefficient. Lower case letters (a–d) indicate differences between classes for  $p < 0.05$  independently for each feature.



**Table S11.** The values (mean  $\pm$ SD) of features of *Gray Level Co-occurrence Matrix (GLCM)* of output images, filtrated by *Median* filter, compared between four classes (0-3) of the Equine Odontoclastic Tooth Resorption and Hypercementosis (EOTRH) syndrome. When features differed significantly ( $p < 0.05$ ).

| Feature                    |   | EOTRH    | 0    | 1     | 2     | 3     | Feature                    |   | EOTRH    | 0     | 1     | 2     | 3     |
|----------------------------|---|----------|------|-------|-------|-------|----------------------------|---|----------|-------|-------|-------|-------|
| <b>Autocorrelation</b>     |   | Mean     | 11.5 | 14.7  | 15.5  | 19.1  | <b>IDN</b>                 |   | Mean     | 0.90  | 0.90  | 0.90  | 0.90  |
|                            |   | SD       | 3.6  | 4.4   | 4.8   | 6.8   |                            |   | SD       | 0.02  | 0.01  | 0.02  | 0.02  |
| <b>Cluster Prominence</b>  | p | < 0.0001 | a    | b     | b     | c     | <b>IMC 1</b>               | p | 0.1643   | a     | a     | a     | a     |
|                            |   | Mean     | 14.0 | 14.2  | 16.8  | 41.1  |                            |   | Mean     | -0.10 | -0.10 | -0.10 | -0.10 |
| <b>Cluster Shade</b>       |   | SD       | 11.1 | 19.2  | 13.9  | 52.0  | <b>IMC 2</b>               |   | SD       | 0.03  | 0.03  | 0.04  | 0.04  |
|                            | p | < 0.0001 | a    | a     | a     | b     |                            | p | 0.8765   | a     | a     | a     | a     |
| <b>Cluster Tendency</b>    |   | Mean     | 0.55 | -0.56 | -1.05 | -2.47 | <b>Inverse Variance</b>    |   | Mean     | 0.51  | 0.50  | 0.51  | 0.53  |
|                            |   | SD       | 1.07 | 1.27  | 1.41  | 2.86  |                            |   | SD       | 0.09  | 0.09  | 0.10  | 0.10  |
| <b>Contrast</b>            | p | < 0.0001 | a    | b     | c     | d     | <b>Joint Average</b>       | p | 0.0839   | a     | a     | a     | a     |
|                            |   | Mean     | 2.06 | 1.93  | 2.24  | 3.36  |                            |   | Mean     | 0.48  | 0.47  | 0.48  | 0.47  |
| <b>Correlation</b>         |   | SD       | 0.89 | 0.98  | 0.93  | 2.19  | <b>Joint Energy</b>        |   | SD       | 0.04  | 0.04  | 0.04  | 0.04  |
|                            | p | < 0.0001 | a    | a     | a     | b     |                            | p | 0.0682   | a     | a     | a     | a     |
| <b>Difference Average</b>  |   | Mean     | 0.99 | 1.05  | 1.11  | 1.43  | <b>Joint Entropy</b>       |   | Mean     | 3.32  | 3.76  | 3.85  | 4.25  |
|                            |   | SD       | 0.33 | 0.34  | 0.35  | 0.80  |                            |   | SD       | 0.52  | 0.56  | 0.62  | 0.74  |
| <b>Difference Entropy</b>  | p | 0.0009   | a    | ab    | b     | b     | <b>MCC</b>                 | p | < 0.0001 | a     | b     | b     | c     |
|                            |   | Mean     | 0.33 | 0.27  | 0.31  | 0.38  |                            |   | Mean     | 0.14  | 0.16  | 0.13  | 0.11  |
| <b>Difference Variance</b> |   | SD       | 0.11 | 0.14  | 0.15  | 0.12  | <b>Maximum Probability</b> |   | SD       | 0.05  | 0.05  | 0.04  | 0.05  |
|                            | p | < 0.0001 | ac   | b     | a     | c     |                            | p | < 0.0001 | a     | b     | ac    | bc    |
| <b>ID</b>                  |   | Mean     | 0.69 | 0.71  | 0.74  | 0.84  | <b>Sum Average</b>         |   | Mean     | 3.35  | 3.28  | 3.46  | 3.78  |
|                            |   | SD       | 0.14 | 0.14  | 0.14  | 0.27  |                            |   | SD       | 0.45  | 0.43  | 0.40  | 0.71  |
| <b>IDM</b>                 | p | 0.0037   | a    | a     | ab    | b     | <b>Sum Entropy</b>         | p | < 0.0001 | ab    | a     | bc    | c     |
|                            |   | Mean     | 1.39 | 1.43  | 1.46  | 1.56  |                            |   | Mean     | 0.44  | 0.41  | 0.42  | 0.44  |
| <b>IDMN</b>                |   | SD       | 0.15 | 0.15  | 0.15  | 0.27  | <b>Sum Squares</b>         |   | SD       | 0.09  | 0.09  | 0.10  | 0.11  |
|                            | p | 0.0002   | a    | ab    | b     | b     |                            | p | 0.061    | a     | a     | a     | a     |
|                            |   | Mean     | 0.46 | 0.51  | 0.52  | 0.64  |                            |   | Mean     | 0.25  | 0.28  | 0.24  | 0.21  |
|                            |   | SD       | 0.12 | 0.13  | 0.13  | 0.28  |                            |   | SD       | 0.08  | 0.09  | 0.07  | 0.10  |
|                            | p | < 0.0001 | a    | b     | b     | b     |                            | p | < 0.0001 | a     | b     | a     | a     |
|                            |   | Mean     | 0.70 | 0.70  | 0.68  | 0.66  |                            |   | Mean     | 6.64  | 7.52  | 7.70  | 8.49  |
|                            |   | SD       | 0.05 | 0.04  | 0.04  | 0.07  |                            |   | SD       | 1.04  | 1.13  | 1.23  | 1.48  |
|                            | p | 0.0041   | a    | a     | ab    | b     |                            | p | < 0.0001 | a     | b     | b     | c     |
|                            |   | Mean     | 0.68 | 0.68  | 0.67  | 0.64  |                            |   | Mean     | 2.42  | 2.36  | 2.49  | 2.69  |
|                            |   | SD       | 0.05 | 0.05  | 0.05  | 0.09  |                            |   | SD       | 0.29  | 0.28  | 0.27  | 0.40  |
|                            | p | 0.0044   | a    | a     | ab    | b     |                            | p | < 0.0001 | ab    | a     | bc    | c     |
|                            |   | Mean     | 0.97 | 0.97  | 0.97  | 0.97  |                            |   | Mean     | 0.76  | 0.74  | 0.84  | 1.20  |
|                            |   | SD       | 0.01 | 0.01  | 0.01  | 0.01  |                            |   | SD       | 0.29  | 0.31  | 0.28  | 0.72  |
|                            | p | 0.5074   | a    | a     | a     | a     |                            | p | < 0.0001 | ab    | a     | bc    | c     |

ID - inverse difference; IDM - inverse difference moment; IDMN - inverse difference moment normalized; IDN - inverse difference normalized; IMC 1 - informational measure of correlation 1; IMC 2 - informational measure of correlation 2; MCC - maximal correlation coefficient. Lower case letters (a–d) indicate differences between classes for  $p < 0.05$  independently for each feature.



**Table S12.** The values (mean  $\pm$ SD) of features of *Gray Level Co-occurrence Matrix (GLCM)* of output images, filtrated by *Normalize* filter, compared between four classes (0-3) of the Equine Odontoclastic Tooth Resorption and Hypercementosis (EOTRH) syndrome. When features differed significantly ( $p < 0.05$ ).

| Feature                    | EOTRH      | 0    | 1    | 2    | 3     | Feature                    | EOTRH      | 0     | 1    | 2    | 3     |
|----------------------------|------------|------|------|------|-------|----------------------------|------------|-------|------|------|-------|
| <b>Autocorrelation</b>     | Mean       | 1.27 | 1.73 | 2.13 | 2.71  | <b>IDN</b>                 | Mean       | 1.00  | 1.00 | 1.00 | 0.99  |
|                            | SD         | 0.85 | 1.28 | 1.45 | 1.44  |                            | SD         | 0.00  | 0.01 | 0.00 | 0.02  |
| <b>Cluster Prominence</b>  | p < 0.0001 | a    | b    | bc   | c     | <b>IMC 1</b>               | p < 0.0001 | a     | b    | b    | c     |
|                            | Mean       | 0.01 | 0.01 | 0.01 | 0.05  |                            | Mean       | -0.01 | 0.00 | 0.00 | -0.01 |
| <b>Cluster Shade</b>       | SD         | 0.02 | 0.05 | 0.09 | 0.09  | <b>IMC 2</b>               | SD         | 0.05  | 0.01 | 0.01 | 0.01  |
|                            | p < 0.0001 | a    | b    | b    | c     |                            | p < 0.0001 | a     | b    | b    | c     |
| <b>Cluster Tendency</b>    | Mean       | 0.00 | 0.00 | 0.00 | -0.03 | <b>Inverse Variance</b>    | Mean       | 0.01  | 0.01 | 0.01 | 0.03  |
|                            | SD         | 0.00 | 0.03 | 0.01 | 0.06  |                            | SD         | 0.08  | 0.03 | 0.02 | 0.05  |
| <b>Contrast</b>            | p < 0.0001 | a    | b    | b    | c     | <b>Joint Average</b>       | p < 0.0001 | a     | b    | b    | c     |
|                            | Mean       | 0.01 | 0.01 | 0.00 | 0.03  |                            | Mean       | 0.00  | 0.00 | 0.00 | 0.03  |
| <b>Correlation</b>         | SD         | 0.09 | 0.04 | 0.01 | 0.06  | <b>Joint Energy</b>        | SD         | 0.01  | 0.02 | 0.01 | 0.05  |
|                            | p < 0.0001 | a    | ab   | b    | c     |                            | p < 0.0001 | a     | b    | b    | c     |
| <b>Difference Average</b>  | Mean       | 0.00 | 0.00 | 0.00 | 0.03  | <b>Joint Entropy</b>       | Mean       | 1.09  | 1.24 | 1.38 | 1.57  |
|                            | SD         | 0.01 | 0.02 | 0.01 | 0.05  |                            | SD         | 0.28  | 0.43 | 0.48 | 0.48  |
| <b>Difference Entropy</b>  | p < 0.0001 | a    | b    | bc   | c     | <b>MCC</b>                 | p < 0.0001 | a     | b    | bc   | c     |
|                            | Mean       | 0.00 | 0.00 | 0.00 | 0.03  |                            | Mean       | 0.99  | 0.99 | 0.99 | 0.94  |
| <b>Difference Variance</b> | SD         | 0.01 | 0.02 | 0.01 | 0.05  | <b>Maximum Probability</b> | SD         | 0.06  | 0.05 | 0.02 | 0.10  |
|                            | p < 0.0001 | a    | b    | b    | c     |                            | p < 0.0001 | a     | ab   | b    | c     |
| <b>ID</b>                  | Mean       | 0.01 | 0.02 | 0.03 | 0.13  | <b>Sum Average</b>         | Mean       | 0.02  | 0.03 | 0.03 | 0.18  |
|                            | SD         | 0.04 | 0.07 | 0.06 | 0.20  |                            | SD         | 0.14  | 0.13 | 0.08 | 0.29  |
| <b>IDM</b>                 | p < 0.0001 | a    | b    | b    | c     | <b>Sum Entropy</b>         | p < 0.0001 | a     | ab   | b    | c     |
|                            | Mean       | 0.01 | 0.02 | 0.03 | 0.13  |                            | Mean       | 0.91  | 0.76 | 0.63 | 0.44  |
| <b>IDMN</b>                | SD         | 0.04 | 0.07 | 0.06 | 0.20  | <b>Sum Squares</b>         | SD         | 0.28  | 0.42 | 0.48 | 0.47  |
|                            | p < 0.0001 | a    | b    | b    | c     |                            | p < 0.0001 | a     | b    | bc   | c     |
|                            | Mean       | 0.00 | 0.00 | 0.00 | 0.02  |                            | Mean       | 0.99  | 1.00 | 1.00 | 0.97  |
|                            | SD         | 0.01 | 0.02 | 0.01 | 0.04  |                            | SD         | 0.05  | 0.03 | 0.01 | 0.06  |
|                            | p < 0.0001 | a    | b    | b    | c     |                            | p < 0.0001 | a     | b    | b    | c     |
|                            | Mean       | 1.00 | 1.00 | 1.00 | 0.99  |                            | Mean       | 2.18  | 2.49 | 2.75 | 3.15  |
|                            | SD         | 0.00 | 0.01 | 0.00 | 0.02  |                            | SD         | 0.57  | 0.86 | 0.97 | 0.97  |
|                            | p < 0.0001 | a    | b    | b    | c     |                            | p < 0.0001 | a     | b    | bc   | c     |
|                            | Mean       | 1.00 | 1.00 | 1.00 | 0.99  |                            | Mean       | 0.02  | 0.02 | 0.03 | 0.15  |
|                            | SD         | 0.00 | 0.01 | 0.00 | 0.02  |                            | SD         | 0.13  | 0.11 | 0.07 | 0.24  |
|                            | p < 0.0001 | a    | b    | b    | c     |                            | p < 0.0001 | a     | ab   | b    | c     |
|                            | Mean       | 1.00 | 1.00 | 1.00 | 0.99  |                            | Mean       | 0.00  | 0.00 | 0.00 | 0.02  |
|                            | SD         | 0.00 | 0.00 | 0.00 | 0.01  |                            | SD         | 0.02  | 0.01 | 0.01 | 0.03  |
|                            | p < 0.0001 | a    | b    | b    | c     |                            | p < 0.0001 | a     | ab   | b    | c     |

ID - inverse difference; IDM - inverse difference moment; IDMN - inverse difference moment normalized; IDN - inverse difference normalized; IMC 1 - informational measure of correlation 1; IMC 2 - informational measure of correlation 2; MCC - maximal correlation coefficient. Lower case letters (a–c) indicate differences between classes for  $p < 0.05$  independently for each feature.



**Table S13.** The values (mean  $\pm$ SD) of features of *Gray Level Co-occurrence Matrix (GLCM)* of output images, filtrated by *Bilateral* filter, compared between four classes (0-3) of the Equine Odontoclastic Tooth Resorption and Hypercementosis (EOTRH) syndrome. When features differed significantly ( $p < 0.05$ ).

| Feature                    | EOTRH | 0        | 1     | 2     | 3     | Feature                    | EOTRH | 0        | 1     | 2     | 3     |
|----------------------------|-------|----------|-------|-------|-------|----------------------------|-------|----------|-------|-------|-------|
| <b>Autocorrelation</b>     | Mean  | 7.35     | 10.69 | 11.40 | 14.19 | <b>IDN</b>                 | Mean  | 0.93     | 0.92  | 0.92  | 0.92  |
|                            | SD    | 2.71     | 3.61  | 4.25  | 4.61  |                            | SD    | 0.02     | 0.02  | 0.02  | 0.02  |
| <b>Cluster Prominence</b>  | p     | 0.0001   | a     | b     | c     | <b>IMC 1</b>               | p     | < 0.0001 | a     | b     | b     |
|                            | Mean  | 5.99     | 7.57  | 8.04  | 21.05 |                            | Mean  | -0.22    | -0.19 | -0.19 | -0.18 |
| <b>Cluster Shade</b>       | SD    | 5.27     | 9.61  | 7.40  | 28.98 | <b>IMC 2</b>               | SD    | 0.06     | 0.07  | 0.07  | 0.06  |
|                            | p     | 0.0001   | a     | a     | b     |                            | p     | < 0.0001 | a     | b     | b     |
| <b>Cluster Tendency</b>    | Mean  | 0.42     | -0.31 | -0.59 | -1.31 | <b>Inverse Variance</b>    | Mean  | 0.64     | 0.60  | 0.60  | 0.63  |
|                            | SD    | 0.76     | 1.00  | 0.89  | 2.26  |                            | SD    | 0.10     | 0.12  | 0.12  | 0.11  |
| <b>Contrast</b>            | p     | < 0.0001 | a     | b     | c     | <b>Joint Average</b>       | p     | 0.0027   | a     | b     | b     |
|                            | Mean  | 1.35     | 1.42  | 1.54  | 2.40  |                            | Mean  | 0.33     | 0.36  | 0.38  | 0.40  |
| <b>Correlation</b>         | SD    | 0.63     | 0.74  | 0.67  | 1.63  | <b>Joint Energy</b>        | SD    | 0.07     | 0.07  | 0.07  | 0.06  |
|                            | p     | < 0.0001 | a     | a     | b     |                            | p     | < 0.0001 | a     | b     | bc    |
| <b>Difference Average</b>  | Mean  | 0.38     | 0.52  | 0.55  | 0.70  | <b>Joint Entropy</b>       | Mean  | 2.62     | 3.19  | 3.28  | 3.66  |
|                            | SD    | 0.12     | 0.19  | 0.21  | 0.35  |                            | SD    | 0.48     | 0.57  | 0.62  | 0.60  |
| <b>Difference Entropy</b>  | p     | < 0.0001 | a     | b     | c     | <b>MCC</b>                 | p     | < 0.0001 | a     | b     | b     |
|                            | Mean  | 0.54     | 0.43  | 0.45  | 0.50  |                            | Mean  | 0.28     | 0.26  | 0.23  | 0.19  |
| <b>Difference Variance</b> | SD    | 0.10     | 0.15  | 0.16  | 0.13  | <b>Maximum Probability</b> | SD    | 0.10     | 0.09  | 0.07  | 0.08  |
|                            | p     | < 0.0001 | a     | b     | bc    |                            | p     | < 0.0001 | a     | ab    | b     |
| <b>ID</b>                  | Mean  | 0.35     | 0.43  | 0.45  | 0.53  | <b>Sum Average</b>         | Mean  | 2.40     | 2.56  | 2.66  | 3.02  |
|                            | SD    | 0.09     | 0.11  | 0.12  | 0.17  |                            | SD    | 0.44     | 0.44  | 0.41  | 0.65  |
| <b>IDM</b>                 | p     | < 0.0001 | a     | b     | c     | <b>Sum Entropy</b>         | p     | < 0.0001 | a     | b     | b     |
|                            | Mean  | 0.95     | 1.10  | 1.11  | 1.22  |                            | Mean  | 0.60     | 0.55  | 0.54  | 0.55  |
| <b>IDMN</b>                | SD    | 0.13     | 0.15  | 0.16  | 0.22  | <b>Sum Squares</b>         | SD    | 0.10     | 0.13  | 0.13  | 0.11  |
|                            | p     | < 0.0001 | a     | b     | b     |                            | p     | 0.0005   | a     | b     | b     |
|                            | Mean  | 0.24     | 0.31  | 0.31  | 0.38  |                            | Mean  | 0.43     | 0.43  | 0.38  | 0.33  |
|                            | SD    | 0.05     | 0.08  | 0.09  | 0.13  |                            | SD    | 0.13     | 0.12  | 0.10  | 0.13  |
|                            | p     | < 0.0001 | a     | b     | c     |                            | p     | < 0.0001 | a     | a     | ab    |
|                            | Mean  | 0.83     | 0.80  | 0.79  | 0.76  |                            | Mean  | 5.25     | 6.37  | 6.57  | 7.33  |
|                            | SD    | 0.04     | 0.05  | 0.05  | 0.06  |                            | SD    | 0.95     | 1.14  | 1.24  | 1.20  |
|                            | p     | < 0.0001 | a     | b     | bc    |                            | p     | < 0.0001 | a     | b     | b     |
|                            | Mean  | 0.83     | 0.79  | 0.78  | 0.75  |                            | Mean  | 2.00     | 2.04  | 2.13  | 2.37  |
|                            | SD    | 0.04     | 0.05  | 0.05  | 0.07  |                            | SD    | 0.34     | 0.33  | 0.30  | 0.42  |
|                            | p     | < 0.0001 | a     | b     | bc    |                            | p     | < 0.0001 | a     | a     | a     |
|                            | Mean  | 0.98     | 0.98  | 0.98  | 0.98  |                            | Mean  | 0.43     | 0.48  | 0.52  | 0.78  |
|                            | SD    | 0.01     | 0.01  | 0.01  | 0.01  |                            | SD    | 0.18     | 0.21  | 0.20  | 0.48  |
|                            | p     | 0.042    | a     | b     | ab    |                            | p     | < 0.0001 | a     | a     | b     |

ID - inverse difference; IDM - inverse difference moment; IDMN - inverse difference moment normalized; IDN - inverse difference normalized; IMC 1 - informational measure of correlation 1; IMC 2 - informational measure of correlation 2; MCC - maximal correlation coefficient. Lower case letters (a–c) indicate differences between classes for  $p < 0.05$  independently for each feature.



**Table S14.** The values (mean  $\pm$ SD) of features of *Gray Level Co-occurrence Matrix (GLCM)* of output images, filtrated by *Binomial* filter, compared between four classes (0-3) of the Equine Odontoclastic Tooth Resorption and Hypercementosis (EOTRH) syndrome. When features differed significantly ( $p < 0.05$ ).

| Feature                    | EOTRH      | 0    | 1     | 2     | 3     | Feature                    | EOTRH      | 0     | 1     | 2     | 3     |
|----------------------------|------------|------|-------|-------|-------|----------------------------|------------|-------|-------|-------|-------|
| <b>Autocorrelation</b>     | Mean       | 11.4 | 14.6  | 15.4  | 19.0  | <b>IDN</b>                 | Mean       | 0.90  | 0.90  | 0.90  | 0.90  |
|                            | SD         | 3.6  | 4.4   | 4.9   | 6.1   |                            | SD         | 0.02  | 0.01  | 0.02  | 0.02  |
| <b>Cluster Prominence</b>  | p < 0.0001 | a    | b     | b     | c     | <b>IMC 1</b>               | p 0.0591   | a     | a     | a     | a     |
|                            | Mean       | 13.2 | 13.8  | 16.4  | 40.0  |                            | Mean       | -0.10 | -0.10 | -0.10 | -0.10 |
| <b>Cluster Shade</b>       | SD         | 10.4 | 18.3  | 13.2  | 50.1  | <b>IMC 2</b>               | SD         | 0.03  | 0.03  | 0.04  | 0.04  |
|                            | p < 0.0001 | a    | a     | a     | b     |                            | p 0.8716   | a     | a     | a     | a     |
| <b>Cluster Tendency</b>    | Mean       | 0.50 | -0.58 | -1.05 | -2.40 | <b>Inverse Variance</b>    | Mean       | 0.51  | 0.50  | 0.51  | 0.53  |
|                            | SD         | 0.98 | 1.21  | 1.41  | 2.78  |                            | SD         | 0.09  | 0.09  | 0.10  | 0.10  |
| <b>Contrast</b>            | p < 0.0001 | a    | b     | c     | d     | <b>Joint Average</b>       | p 0.1289   | a     | a     | a     | a     |
|                            | Mean       | 2.01 | 1.91  | 2.23  | 3.33  |                            | Mean       | 0.48  | 0.47  | 0.48  | 0.47  |
| <b>Correlation</b>         | SD         | 0.86 | 0.95  | 0.91  | 2.15  | <b>Joint Energy</b>        | SD         | 0.04  | 0.04  | 0.04  | 0.04  |
|                            | p < 0.0001 | ab   | a     | b     | c     |                            | p 0.008    | ab    | a     | b     | ab    |
| <b>Difference Average</b>  | Mean       | 0.95 | 1.04  | 1.10  | 1.41  | <b>Joint Entropy</b>       | Mean       | 3.29  | 3.75  | 3.84  | 4.25  |
|                            | SD         | 0.30 | 0.34  | 0.34  | 0.77  |                            | SD         | 0.52  | 0.56  | 0.62  | 0.68  |
| <b>Difference Entropy</b>  | p 0.0001   | a    | ab    | b     | b     | <b>MCC</b>                 | p < 0.0001 | a     | a     | b     | c     |
|                            | Mean       | 0.34 | 0.27  | 0.32  | 0.38  |                            | Mean       | 0.14  | 0.16  | 0.13  | 0.11  |
| <b>Difference Variance</b> | SD         | 0.11 | 0.14  | 0.15  | 0.13  | <b>Sum Average</b>         | SD         | 0.05  | 0.05  | 0.04  | 0.05  |
|                            | p < 0.0001 | ac   | b     | a     | c     |                            | p < 0.0001 | ab    | a     | bc    | c     |
| <b>ID</b>                  | Mean       | 0.68 | 0.71  | 0.74  | 0.83  | <b>Sum Entropy</b>         | Mean       | 3.32  | 3.28  | 3.45  | 3.77  |
|                            | SD         | 0.13 | 0.13  | 0.13  | 0.27  |                            | SD         | 0.44  | 0.42  | 0.39  | 0.71  |
| <b>IDM</b>                 | p 0.0006   | a    | ab    | bc    | c     | <b>Sum Squares</b>         | p < 0.0001 | ab    | a     | bc    | c     |
|                            | Mean       | 1.37 | 1.43  | 1.45  | 1.55  |                            | Mean       | 0.44  | 0.42  | 0.42  | 0.44  |
| <b>IDMN</b>                | SD         | 0.15 | 0.14  | 0.15  | 0.27  | <b>Maximum Probability</b> | SD         | 0.09  | 0.09  | 0.10  | 0.11  |
|                            | p < 0.0001 | a    | b     | b     | b     |                            | p 0.0594   | a     | a     | a     | a     |
| <b>IDM</b>                 | Mean       | 0.45 | 0.50  | 0.51  | 0.63  | <b>Sum Entropy</b>         | Mean       | 0.25  | 0.28  | 0.24  | 0.22  |
|                            | SD         | 0.10 | 0.12  | 0.13  | 0.27  |                            | SD         | 0.08  | 0.09  | 0.07  | 0.10  |
| <b>IDM</b>                 | p < 0.0001 | a    | b     | b     | b     | <b>Sum Squares</b>         | p < 0.0001 | a     | b     | a     | a     |
|                            | Mean       | 0.70 | 0.70  | 0.68  | 0.66  |                            | Mean       | 6.59  | 7.50  | 7.68  | 8.51  |
| <b>IDM</b>                 | SD         | 0.04 | 0.04  | 0.04  | 0.07  | <b>Sum Squares</b>         | SD         | 1.04  | 1.12  | 1.23  | 1.35  |
|                            | p 0.0014   | a    | a     | ab    | b     |                            | p < 0.0001 | a     | b     | b     | c     |
| <b>IDM</b>                 | Mean       | 0.69 | 0.68  | 0.67  | 0.64  | <b>Sum Squares</b>         | Mean       | 2.41  | 2.36  | 2.49  | 2.68  |
|                            | SD         | 0.05 | 0.05  | 0.05  | 0.09  |                            | SD         | 0.28  | 0.28  | 0.27  | 0.39  |
| <b>IDM</b>                 | p 0.0013   | a    | ab    | bc    | c     | <b>Sum Squares</b>         | p < 0.0001 | ab    | a     | bc    | c     |
|                            | Mean       | 0.97 | 0.97  | 0.97  | 0.97  |                            | Mean       | 0.74  | 0.74  | 0.83  | 1.18  |
| <b>IDM</b>                 | SD         | 0.01 | 0.01  | 0.01  | 0.01  |                            | SD         | 0.28  | 0.30  | 0.28  | 0.70  |
|                            | p 0.2595   | a    | a     | a     | a     |                            | p < 0.0001 | a     | a     | b     | b     |

ID - inverse difference; IDM - inverse difference moment; IDMN - inverse difference moment normalized; IDN - inverse difference normalized; IMC 1 - informational measure of correlation 1; IMC 2 - informational measure of correlation 2; MCC - maximal correlation coefficient. Lower case letters (a–d) indicate differences between classes for  $p < 0.05$  independently for each feature.



**Table S15.** The values (mean  $\pm$ SD) of features of *Gray Level Co-occurrence Matrix (GLCM)* of output images, filtrated by *CurvatureFlow* filter, compared between four classes (0-3) of the Equine Odontoclastic Tooth Resorption and Hypercementosis (EOTRH) syndrome. When features differed significantly ( $p < 0.05$ ).

| Feature                                               | EOTRH      | 0    | 1     | 2     | 3     | Feature                    | EOTRH      | 0     | 1     | 2     | 3     |
|-------------------------------------------------------|------------|------|-------|-------|-------|----------------------------|------------|-------|-------|-------|-------|
| <b>Autocorrelation</b>                                | Mean       | 12.8 | 15.9  | 16.6  | 21.0  | <b>IDN</b>                 | Mean       | 0.90  | 0.90  | 0.90  | 0.90  |
|                                                       | SD         | 3.6  | 4.6   | 5.3   | 7.6   |                            | SD         | 0.02  | 0.01  | 0.02  | 0.02  |
| <b>Cluster Prominence</b>                             | p < 0.0001 | a    | b     | b     | c     | <b>IMC 1</b>               | p 0.5741   | a     | a     | a     | a     |
|                                                       | Mean       | 15.5 | 15.8  | 18.6  | 45.8  |                            | Mean       | -0.09 | -0.09 | -0.09 | -0.09 |
| <b>Cluster Shade</b>                                  | SD         | 11.8 | 20.6  | 14.8  | 55.9  | <b>IMC 2</b>               | SD         | 0.03  | 0.03  | 0.03  | 0.04  |
|                                                       | p < 0.0001 | a    | a     | a     | b     |                            | p 0.9815   | a     | a     | a     | a     |
| <b>Cluster Tendency</b>                               | Mean       | 0.55 | -0.54 | -1.08 | -2.73 | <b>Inverse Variance</b>    | Mean       | 0.49  | 0.47  | 0.48  | 0.50  |
|                                                       | SD         | 1.06 | 1.30  | 1.48  | 2.99  |                            | SD         | 0.09  | 0.09  | 0.10  | 0.10  |
| <b>Contrast</b>                                       | p < 0.0001 | a    | b     | c     | d     | <b>Joint Average</b>       | p 0.1828   | a     | a     | a     | a     |
|                                                       | Mean       | 2.17 | 2.04  | 2.36  | 3.53  |                            | Mean       | 0.49  | 0.48  | 0.49  | 0.47  |
| <b>Correlation</b>                                    | SD         | 0.91 | 1.00  | 0.94  | 2.29  | <b>Joint Energy</b>        | SD         | 0.03  | 0.04  | 0.03  | 0.03  |
|                                                       | p < 0.0001 | ab   | a     | b     | c     |                            | p 0.0005   | a     | ab    | a     | b     |
| <b>Difference Average</b>                             | Mean       | 1.11 | 1.16  | 1.23  | 1.61  | <b>Joint Entropy</b>       | Mean       | 3.50  | 3.91  | 4.00  | 4.46  |
|                                                       | SD         | 0.36 | 0.38  | 0.37  | 0.94  |                            | SD         | 0.49  | 0.57  | 0.62  | 0.80  |
| <b>Difference Entropy</b>                             | p 0.0021   | a    | ab    | b     | b     | <b>MCC</b>                 | p < 0.0001 | a     | b     | b     | c     |
|                                                       | Mean       | 0.31 | 0.25  | 0.29  | 0.36  |                            | Mean       | 0.13  | 0.14  | 0.12  | 0.11  |
| <b>Difference Variance</b>                            | SD         | 0.11 | 0.14  | 0.15  | 0.12  | <b>Maximum Probability</b> | SD         | 0.04  | 0.05  | 0.04  | 0.05  |
|                                                       | p < 0.0001 | ac   | b     | a     | c     |                            | p < 0.0001 | a     | b     | a     | a     |
| <b>ID</b>                                             | Mean       | 0.75 | 0.76  | 0.79  | 0.89  | <b>Sum Average</b>         | Mean       | 3.49  | 3.42  | 3.59  | 3.91  |
|                                                       | SD         | 0.15 | 0.14  | 0.14  | 0.30  |                            | SD         | 0.45  | 0.42  | 0.39  | 0.74  |
| <b>IDM</b>                                            | p 0.0084   | a    | ab    | ab    | b     | <b>Sum Entropy</b>         | p < 0.0001 | ab    | a     | bc    | c     |
|                                                       | Mean       | 1.45 | 1.49  | 1.52  | 1.63  |                            | Mean       | 0.41  | 0.39  | 0.40  | 0.42  |
| <b>IDMN</b>                                           | SD         | 0.16 | 0.15  | 0.15  | 0.29  | <b>Sum Squares</b>         | SD         | 0.09  | 0.09  | 0.10  | 0.10  |
|                                                       | p 0.0006   | a    | ab    | b     | b     |                            | p 0.1047   | a     | a     | a     | a     |
| <b>ID - inverse difference</b>                        | Mean       | 0.51 | 0.55  | 0.56  | 0.71  | <b>Sum Entropy</b>         | Mean       | 0.23  | 0.26  | 0.22  | 0.20  |
|                                                       | SD         | 0.13 | 0.14  | 0.14  | 0.33  |                            | SD         | 0.08  | 0.09  | 0.07  | 0.09  |
| <b>IDM - inverse difference moment</b>                | p < 0.0001 | a    | b     | b     | b     | <b>Sum Entropy</b>         | p < 0.0001 | a     | b     | a     | a     |
|                                                       | Mean       | 0.68 | 0.68  | 0.67  | 0.65  |                            | Mean       | 7.01  | 7.83  | 8.00  | 8.92  |
| <b>IDMN - inverse difference moment normalized</b>    | SD         | 0.04 | 0.04  | 0.04  | 0.07  | <b>Sum Squares</b>         | SD         | 0.97  | 1.14  | 1.24  | 1.60  |
|                                                       | p 0.0116   | ab   | a     | ab    | b     |                            | p < 0.0001 | a     | b     | b     | c     |
| <b>IDN - inverse difference normalized</b>            | Mean       | 0.66 | 0.66  | 0.65  | 0.62  | <b>Sum Squares</b>         | Mean       | 2.48  | 2.42  | 2.54  | 2.74  |
|                                                       | SD         | 0.05 | 0.05  | 0.05  | 0.09  |                            | SD         | 0.28  | 0.27  | 0.26  | 0.40  |
| <b>IMC 1 - informational measure of correlation 1</b> | p 0.0112   | ab   | a     | ab    | b     | <b>Sum Squares</b>         | p < 0.0001 | ab    | a     | bc    | c     |
|                                                       | Mean       | 0.97 | 0.97  | 0.97  | 0.97  |                            | Mean       | 0.82  | 0.80  | 0.90  | 1.29  |
| <b>IMC 2 - informational measure of correlation 2</b> | SD         | 0.01 | 0.01  | 0.01  | 0.01  |                            | SD         | 0.30  | 0.32  | 0.29  | 0.78  |
|                                                       | p 0.8714   | a    | a     | a     | a     |                            | p < 0.0001 | ab    | a     | bc    | c     |

ID - inverse difference; IDM - inverse difference moment; IDMN - inverse difference moment normalized; IDN - inverse difference normalized; IMC 1 - informational measure of correlation 1; IMC 2 - informational measure of correlation 2; MCC - maximal correlation coefficient. Lower case letters (a–d) indicate differences between classes for  $p < 0.05$  independently for each feature.



**Table S16.** The values (mean  $\pm$ SD) of features of *Gray Level Co-occurrence Matrix (GLCM)* of output images, filtrated by *LaplacianSharpening* filter, compared between four classes (0-3) of the Equine Odontoclastic Tooth Resorption and Hypercementosis (EOTRH) syndrome. When features differed significantly ( $p < 0.05$ ).

| Feature                    | EOTRH      | 0    | 1     | 2     | 3     | Feature                    | EOTRH      | 0     | 1     | 2     | 3     |
|----------------------------|------------|------|-------|-------|-------|----------------------------|------------|-------|-------|-------|-------|
| <b>Autocorrelation</b>     | Mean       | 31.3 | 36.6  | 38.5  | 47.1  | <b>IDN</b>                 | Mean       | 0.88  | 0.89  | 0.89  | 0.88  |
|                            | SD         | 8.9  | 11.9  | 11.8  | 13.8  |                            | SD         | 0.01  | 0.01  | 0.01  | 0.02  |
| <b>Cluster Prominence</b>  | p < 0.0001 | a    | b     | b     | c     | <b>IMC 1</b>               | p 0.3321   | a     | a     | a     | a     |
|                            | Mean       | 45.3 | 44.6  | 54.3  | 134.6 |                            | Mean       | -0.03 | -0.03 | -0.03 | -0.03 |
| <b>Cluster Shade</b>       | SD         | 29.7 | 37.5  | 35.1  | 150.4 | <b>IMC 2</b>               | SD         | 0.01  | 0.01  | 0.01  | 0.01  |
|                            | p < 0.0001 | a    | a     | a     | b     |                            | p 0.6204   | a     | a     | a     | a     |
| <b>Cluster Tendency</b>    | Mean       | 0.32 | -1.38 | -2.32 | -6.71 | <b>Inverse Variance</b>    | Mean       | 0.33  | 0.32  | 0.32  | 0.35  |
|                            | SD         | 1.37 | 2.09  | 2.81  | 6.46  |                            | SD         | 0.06  | 0.05  | 0.07  | 0.08  |
| <b>Contrast</b>            | p < 0.0001 | a    | b     | b     | c     | <b>Joint Average</b>       | p 0.1247   | a     | a     | a     | a     |
|                            | Mean       | 3.71 | 3.52  | 3.96  | 5.84  |                            | Mean       | 0.47  | 0.47  | 0.47  | 0.44  |
| <b>Correlation</b>         | SD         | 1.30 | 1.31  | 1.31  | 3.63  | <b>Joint Energy</b>        | SD         | 0.02  | 0.02  | 0.02  | 0.05  |
|                            | p < 0.0001 | ab   | a     | bc    | c     |                            | p 0.002    | a     | a     | ab    | b     |
| <b>Difference Average</b>  | Mean       | 2.69 | 2.70  | 2.87  | 3.97  | <b>Joint Entropy</b>       | Mean       | 5.52  | 5.95  | 6.11  | 6.75  |
|                            | SD         | 0.83 | 0.81  | 0.83  | 2.49  |                            | SD         | 0.78  | 0.97  | 0.96  | 1.05  |
| <b>Difference Entropy</b>  | p 0.0098   | a    | a     | ab    | b     | <b>MCC</b>                 | p < 0.0001 | a     | b     | b     | c     |
|                            | Mean       | 0.15 | 0.12  | 0.15  | 0.19  |                            | Mean       | 0.06  | 0.06  | 0.06  | 0.05  |
| <b>Difference Variance</b> | SD         | 0.08 | 0.08  | 0.09  | 0.09  | <b>Maximum Probability</b> | SD         | 0.02  | 0.02  | 0.02  | 0.02  |
|                            | p < 0.0001 | ac   | b     | a     | c     |                            | p 0.0006   | ab    | a     | b     | b     |
| <b>ID</b>                  | Mean       | 1.23 | 1.23  | 1.27  | 1.45  | <b>Sum Average</b>         | Mean       | 4.60  | 4.53  | 4.66  | 4.97  |
|                            | SD         | 0.20 | 0.19  | 0.19  | 0.47  |                            | SD         | 0.43  | 0.40  | 0.41  | 0.75  |
| <b>IDM</b>                 | p 0.029    | a    | a     | b     | b     | <b>Sum Entropy</b>         | p 0.0005   | ab    | a     | b     | b     |
|                            | Mean       | 1.97 | 1.98  | 2.02  | 2.15  |                            | Mean       | 0.24  | 0.23  | 0.23  | 0.25  |
| <b>IDMN</b>                | SD         | 0.17 | 0.16  | 0.16  | 0.34  | <b>Sum Squares</b>         | SD         | 0.05  | 0.05  | 0.06  | 0.07  |
|                            | p 0.0062   | a    | a     | ab    | b     |                            | p 0.0542   | a     | a     | a     | a     |
|                            | Mean       | 1.11 | 1.15  | 1.21  | 1.65  |                            | Mean       | 0.11  | 0.13  | 0.12  | 0.11  |
|                            | SD         | 0.31 | 0.31  | 0.32  | 0.93  |                            | SD         | 0.04  | 0.04  | 0.04  | 0.05  |
|                            | p 0.0009   | a    | a     | ab    | b     |                            | p 0.0008   | a     | b     | a     | a     |
|                            | Mean       | 0.56 | 0.57  | 0.56  | 0.54  |                            | Mean       | 11.04 | 11.90 | 12.22 | 13.50 |
|                            | SD         | 0.04 | 0.03  | 0.04  | 0.07  |                            | SD         | 1.57  | 1.94  | 1.92  | 2.09  |
|                            | p 0.0673   | a    | a     | a     | a     |                            | p < 0.0001 | a     | b     | b     | c     |
|                            | Mean       | 0.52 | 0.52  | 0.51  | 0.49  |                            | Mean       | 2.93  | 2.88  | 2.97  | 3.15  |
|                            | SD         | 0.05 | 0.04  | 0.04  | 0.09  |                            | SD         | 0.24  | 0.23  | 0.23  | 0.39  |
|                            | p 0.0623   | a    | a     | a     | a     |                            | p < 0.0001 | ab    | a     | bc    | c     |
|                            | Mean       | 0.97 | 0.97  | 0.97  | 0.97  |                            | Mean       | 1.60  | 1.56  | 1.71  | 2.45  |
|                            | SD         | 0.01 | 0.01  | 0.01  | 0.01  |                            | SD         | 0.52  | 0.51  | 0.50  | 1.51  |
|                            | p 0.4064   | a    | a     | a     | a     |                            | p < 0.0001 | ab    | a     | bc    | c     |

ID - inverse difference; IDM - inverse difference moment; IDMN - inverse difference moment normalized; IDN - inverse difference normalized; IMC 1 - informational measure of correlation 1; IMC 2 - informational measure of correlation 2; MCC - maximal correlation coefficient. Lower case letters (a–c) indicate differences between classes for  $p < 0.05$  independently for each feature.



**Table S17.** The values (mean  $\pm$ SD) of features of *Gray Level Co-occurrence Matrix (GLCM)* of output images, filtrated by *DiscreteGaussian* filter, compared between four classes (0-3) of the Equine Odontoclastic Tooth Resorption and Hypercementosis (EOTRH) syndrome. When features differed significantly ( $p < 0.05$ ).

| Feature                    | EOTRH      | 0    | 1     | 2     | 3     | Feature                    | EOTRH      | 0     | 1     | 2     | 3     |
|----------------------------|------------|------|-------|-------|-------|----------------------------|------------|-------|-------|-------|-------|
| <b>Autocorrelation</b>     | Mean       | 10.8 | 13.8  | 14.5  | 18.3  | <b>IDN</b>                 | Mean       | 0.90  | 0.90  | 0.90  | 0.90  |
|                            | SD         | 3.6  | 4.1   | 4.5   | 6.0   |                            | SD         | 0.02  | 0.02  | 0.02  | 0.02  |
| <b>Cluster Prominence</b>  | p < 0.0001 | a    | b     | b     | c     | <b>IMC 1</b>               | p 0.0245   | ab    | a     | b     | b     |
|                            | Mean       | 11.9 | 12.8  | 15.2  | 36.5  |                            | Mean       | -0.12 | -0.11 | -0.12 | -0.11 |
| <b>Cluster Shade</b>       | SD         | 9.6  | 16.8  | 12.3  | 45.7  | <b>IMC 2</b>               | SD         | 0.04  | 0.04  | 0.04  | 0.04  |
|                            | p < 0.0001 | a    | a     | a     | b     |                            | p 0.5215   | a     | a     | a     | a     |
| <b>Cluster Tendency</b>    | Mean       | 0.47 | -0.59 | -1.01 | -2.19 | <b>Inverse Variance</b>    | Mean       | 0.53  | 0.51  | 0.53  | 0.55  |
|                            | SD         | 0.92 | 1.17  | 1.35  | 2.73  |                            | SD         | 0.10  | 0.09  | 0.10  | 0.10  |
| <b>Contrast</b>            | p < 0.0001 | a    | b     | bc    | c     | <b>Joint Average</b>       | p 0.0394   | ab    | a     | b     | b     |
|                            | Mean       | 1.92 | 1.84  | 2.16  | 3.20  |                            | Mean       | 0.47  | 0.46  | 0.48  | 0.47  |
| <b>Correlation</b>         | SD         | 0.83 | 0.92  | 0.88  | 2.05  | <b>Joint Energy</b>        | SD         | 0.04  | 0.05  | 0.04  | 0.04  |
|                            | p < 0.0001 | ab   | a     | b     | c     |                            | p 0.0063   | a     | b     | a     | ab    |
| <b>Difference Average</b>  | Mean       | 0.85 | 0.96  | 1.02  | 1.28  | <b>Joint Entropy</b>       | Mean       | 3.20  | 3.64  | 3.73  | 4.16  |
|                            | SD         | 0.26 | 0.31  | 0.32  | 0.66  |                            | SD         | 0.53  | 0.55  | 0.59  | 0.70  |
| <b>Difference Entropy</b>  | p < 0.0001 | a    | b     | bc    | c     | <b>MCC</b>                 | p < 0.0001 | a     | b     | b     | c     |
|                            | Mean       | 0.37 | 0.29  | 0.34  | 0.40  |                            | Mean       | 0.15  | 0.17  | 0.14  | 0.12  |
| <b>Difference Variance</b> | SD         | 0.11 | 0.14  | 0.16  | 0.13  | <b>Maximum Probability</b> | SD         | 0.05  | 0.06  | 0.04  | 0.06  |
|                            | p < 0.0001 | ac   | b     | a     | c     |                            | p < 0.0001 | a     | a     | ab    | b     |
| <b>ID</b>                  | Mean       | 0.64 | 0.67  | 0.71  | 0.79  | <b>Sum Average</b>         | Mean       | 3.21  | 3.18  | 3.36  | 3.68  |
|                            | SD         | 0.12 | 0.13  | 0.13  | 0.24  |                            | SD         | 0.43  | 0.42  | 0.39  | 0.68  |
| <b>IDM</b>                 | p < 0.0001 | a    | ab    | bc    | c     | <b>Sum Entropy</b>         | p < 0.0001 | a     | a     | a     | b     |
|                            | Mean       | 1.31 | 1.39  | 1.40  | 1.51  |                            | Mean       | 0.46  | 0.43  | 0.44  | 0.46  |
| <b>IDMN</b>                | SD         | 0.14 | 0.14  | 0.15  | 0.25  | <b>Sum Squares</b>         | SD         | 0.09  | 0.10  | 0.10  | 0.11  |
|                            | p < 0.0001 | a    | b     | b     | b     |                            | p 0.0114   | a     | b     | ab    | ab    |
|                            | Mean       | 0.41 | 0.47  | 0.48  | 0.58  |                            | Mean       | 0.26  | 0.30  | 0.25  | 0.23  |
|                            | SD         | 0.09 | 0.11  | 0.12  | 0.23  |                            | SD         | 0.09  | 0.10  | 0.07  | 0.10  |
|                            | p < 0.0001 | a    | b     | b     | b     |                            | p < 0.0001 | a     | b     | a     | a     |
|                            | Mean       | 0.71 | 0.71  | 0.69  | 0.67  |                            | Mean       | 6.39  | 7.28  | 7.46  | 8.32  |
|                            | SD         | 0.04 | 0.04  | 0.04  | 0.07  |                            | SD         | 1.06  | 1.09  | 1.18  | 1.40  |
|                            | p 0.0001   | a    | ab    | bc    | c     |                            | p < 0.0001 | a     | b     | b     | c     |
|                            | Mean       | 0.70 | 0.69  | 0.68  | 0.65  |                            | Mean       | 2.37  | 2.32  | 2.46  | 2.65  |
|                            | SD         | 0.05 | 0.05  | 0.05  | 0.08  |                            | SD         | 0.28  | 0.29  | 0.27  | 0.39  |
|                            | p < 0.0001 | a    | ab    | bc    | c     |                            | p < 0.0001 | a     | a     | ab    | b     |
|                            | Mean       | 0.97 | 0.97  | 0.97  | 0.97  |                            | Mean       | 0.69  | 0.70  | 0.79  | 1.12  |
|                            | SD         | 0.01 | 0.01  | 0.01  | 0.01  |                            | SD         | 0.26  | 0.28  | 0.26  | 0.65  |
|                            | p 0.2025   | a    | a     | a     | a     |                            | p < 0.0001 | a     | a     | b     | b     |

ID - inverse difference; IDM - inverse difference moment; IDMN - inverse difference moment normalized; IDN - inverse difference normalized; IMC 1 - informational measure of correlation 1; IMC 2 - informational measure of correlation 2; MCC - maximal correlation coefficient. Lower case letters (a–d) indicate differences between classes for  $p < 0.05$  independently for each feature.



**Table S18.** The values (mean  $\pm$ SD) of features of *Gray Level Co-occurrence Matrix (GLCM)* of output images, filtrated by *SmoothingRecursiveGaussian* filter, compared between four classes (0-3) of the Equine Odontoclastic Tooth Resorption and Hypercementosis (EOTRH) syndrome. When features differed significantly ( $p < 0.05$ ).

| Feature                    | EOTRH      | 0    | 1     | 2     | 3     | Feature                    | EOTRH      | 0     | 1     | 2     | 3     |
|----------------------------|------------|------|-------|-------|-------|----------------------------|------------|-------|-------|-------|-------|
| <b>Autocorrelation</b>     | Mean       | 10.6 | 13.7  | 14.5  | 18.2  | <b>IDN</b>                 | Mean       | 0.90  | 0.90  | 0.90  | 0.90  |
|                            | SD         | 3.9  | 4.0   | 4.8   | 6.2   |                            | SD         | 0.02  | 0.02  | 0.02  | 0.02  |
| <b>Cluster Prominence</b>  | p < 0.0001 | a    | b     | b     | c     | <b>IMC 1</b>               | p 0.012    | ab    | a     | b     | b     |
|                            | Mean       | 11.9 | 12.8  | 15.2  | 36.3  |                            | Mean       | -0.12 | -0.11 | -0.12 | -0.11 |
| <b>Cluster Shade</b>       | SD         | 9.5  | 16.6  | 12.3  | 45.4  | <b>IMC 2</b>               | SD         | 0.04  | 0.04  | 0.04  | 0.04  |
|                            | p < 0.0001 | a    | a     | a     | b     |                            | p 0.4625   | a     | a     | a     | a     |
| <b>Cluster Tendency</b>    | Mean       | 0.47 | -0.59 | -1.02 | -2.17 | <b>Inverse Variance</b>    | Mean       | 0.54  | 0.51  | 0.53  | 0.55  |
|                            | SD         | 0.93 | 1.18  | 1.36  | 2.71  |                            | SD         | 0.10  | 0.09  | 0.10  | 0.10  |
| <b>Contrast</b>            | p < 0.0001 | a    | b     | b     | c     | <b>Joint Average</b>       | p 0.0735   | a     | a     | a     | a     |
|                            | Mean       | 1.91 | 1.84  | 2.15  | 3.19  |                            | Mean       | 0.47  | 0.46  | 0.47  | 0.47  |
| <b>Correlation</b>         | SD         | 0.82 | 0.92  | 0.88  | 2.04  | <b>Joint Energy</b>        | SD         | 0.04  | 0.05  | 0.04  | 0.04  |
|                            | p < 0.0001 | ab   | a     | b     | c     |                            | p 0.0051   | ab    | a     | b     | ab    |
| <b>Difference Average</b>  | Mean       | 0.84 | 0.96  | 1.02  | 1.27  | <b>Joint Entropy</b>       | Mean       | 3.17  | 3.63  | 3.71  | 4.15  |
|                            | SD         | 0.25 | 0.31  | 0.32  | 0.65  |                            | SD         | 0.57  | 0.53  | 0.64  | 0.71  |
| <b>Difference Entropy</b>  | p < 0.0001 | a    | b     | bc    | c     | <b>MCC</b>                 | p < 0.0001 | a     | b     | b     | c     |
|                            | Mean       | 0.37 | 0.29  | 0.34  | 0.40  |                            | Mean       | 0.16  | 0.17  | 0.14  | 0.12  |
| <b>Difference Variance</b> | SD         | 0.11 | 0.14  | 0.16  | 0.13  | <b>Maximum Probability</b> | SD         | 0.05  | 0.06  | 0.04  | 0.06  |
|                            | p < 0.0001 | ac   | b     | a     | c     |                            | p < 0.0001 | ab    | a     | bc    | c     |
| <b>ID</b>                  | Mean       | 0.63 | 0.67  | 0.70  | 0.79  | <b>Sum Average</b>         | Mean       | 3.20  | 3.18  | 3.35  | 3.67  |
|                            | SD         | 0.12 | 0.13  | 0.13  | 0.24  |                            | SD         | 0.43  | 0.42  | 0.39  | 0.68  |
| <b>IDM</b>                 | p < 0.0001 | a    | ab    | bc    | b     | <b>Sum Entropy</b>         | p < 0.0001 | ab    | a     | bc    | c     |
|                            | Mean       | 1.31 | 1.39  | 1.40  | 1.50  |                            | Mean       | 0.47  | 0.43  | 0.44  | 0.46  |
| <b>IDMN</b>                | SD         | 0.14 | 0.14  | 0.15  | 0.25  | <b>Sum Squares</b>         | SD         | 0.10  | 0.10  | 0.10  | 0.11  |
|                            | p < 0.0001 | a    | b     | b     | b     |                            | p 0.0104   | a     | b     | ab    | ab    |
|                            | Mean       | 0.41 | 0.47  | 0.48  | 0.57  |                            | Mean       | 0.26  | 0.30  | 0.25  | 0.23  |
|                            | SD         | 0.09 | 0.11  | 0.12  | 0.23  |                            | SD         | 0.09  | 0.10  | 0.07  | 0.10  |
|                            | p < 0.0001 | a    | b     | b     | b     |                            | p < 0.0001 | a     | b     | a     | a     |
|                            | Mean       | 0.72 | 0.71  | 0.70  | 0.67  |                            | Mean       | 6.34  | 7.26  | 7.42  | 8.29  |
|                            | SD         | 0.04 | 0.04  | 0.04  | 0.07  |                            | SD         | 1.14  | 1.07  | 1.27  | 1.42  |
|                            | p < 0.0001 | a    | ab    | bc    | c     |                            | p < 0.0001 | a     | b     | b     | c     |
|                            | Mean       | 0.70 | 0.69  | 0.68  | 0.65  |                            | Mean       | 2.37  | 2.32  | 2.45  | 2.65  |
|                            | SD         | 0.05 | 0.05  | 0.05  | 0.08  |                            | SD         | 0.28  | 0.29  | 0.27  | 0.39  |
|                            | p < 0.0001 | a    | ab    | bc    | c     |                            | p < 0.0001 | ab    | a     | bc    | c     |
|                            | Mean       | 0.97 | 0.97  | 0.97  | 0.97  |                            | Mean       | 0.69  | 0.70  | 0.79  | 1.12  |
|                            | SD         | 0.01 | 0.01  | 0.01  | 0.01  |                            | SD         | 0.26  | 0.28  | 0.26  | 0.65  |
|                            | p 0.1191   | a    | a     | a     | a     |                            | p < 0.0001 | a     | a     | b     | b     |

ID - inverse difference; IDM - inverse difference moment; IDMN - inverse difference moment normalized; IDN - inverse difference normalized; IMC 1 - informational measure of correlation 1; IMC 2 - informational measure of correlation 2; MCC - maximal correlation coefficient. Lower case letters (a-c) indicate differences between classes for  $p < 0.05$  independently for each feature.



**Table S19.** The values (mean  $\pm$ SD) of features of *Neighbouring Gray Tone Difference Matrix (NGTDM)* of output images, filtrated by *Mean* filter, compared between four classes (0-3) of the Equine Odontoclastic Tooth Resorption and Hypercementosis (EOTRH) syndrome. When features differed significantly ( $p < 0.05$ ).

| Feature           | EOTRH      | 0    | 1    | 2    | 3     |
|-------------------|------------|------|------|------|-------|
| <b>Busyness</b>   | Mean       | 18.4 | 13.1 | 15.1 | 11.9  |
|                   | SD         | 12.9 | 8.3  | 8.9  | 7.0   |
| <b>Coarseness</b> | p < 0.0001 | a    | b    | b    | b     |
|                   | Mean       | 0.00 | 0.00 | 0.00 | 0.00  |
| <b>Complexity</b> | SD         | 0.00 | 0.00 | 0.00 | 0.00  |
|                   | p 0.0003   | a    | b    | a    | a     |
| <b>Contrast</b>   | Mean       | 6.75 | 7.64 | 7.86 | 10.38 |
|                   | SD         | 2.93 | 3.10 | 2.87 | 6.23  |
| <b>Strength</b>   | p 0.0002   | a    | b    | b    | b     |
|                   | Mean       | 0.03 | 0.03 | 0.04 | 0.05  |
|                   | SD         | 0.01 | 0.01 | 0.02 | 0.02  |
|                   | p 0.0006   | a    | a    | ab   | b     |
|                   | Mean       | 0.04 | 0.05 | 0.04 | 0.06  |
|                   | SD         | 0.02 | 0.02 | 0.02 | 0.04  |
|                   | p 0.0001   | a    | b    | ab   | b     |

Lower case letters (a–c) indicate differences between classes for  $p < 0.05$  independently for each feature.

**Table S20.** The values (mean  $\pm$ SD) of features of *Neighbouring Gray Tone Difference Matrix (NGTDM)* of output images, filtrated by *Median* filter, compared between four classes (0-3) of the Equine Odontoclastic Tooth Resorption and Hypercementosis (EOTRH) syndrome. When features differed significantly ( $p < 0.05$ ).

| Feature           | EOTRH      | 0     | 1     | 2     | 3     |
|-------------------|------------|-------|-------|-------|-------|
| <b>Busyness</b>   | Mean       | 17.1  | 12.1  | 14.7  | 11.4  |
|                   | SD         | 8.7   | 6.7   | 8.8   | 6.9   |
| <b>Coarseness</b> | p < 0.0001 | a     | bc    | b     | c     |
|                   | Mean       | 0.004 | 0.004 | 0.004 | 0.004 |
| <b>Complexity</b> | SD         | 0.001 | 0.002 | 0.002 | 0.002 |
|                   | p 0.0002   | a     | b     | a     | ab    |
| <b>Contrast</b>   | Mean       | 7.40  | 8.29  | 8.53  | 11.41 |
|                   | SD         | 3.17  | 3.31  | 3.14  | 6.88  |
| <b>Strength</b>   | p 0.0004   | a     | b     | b     | b     |
|                   | Mean       | 0.04  | 0.03  | 0.04  | 0.05  |
|                   | SD         | 0.02  | 0.01  | 0.01  | 0.02  |
|                   | p 0.0029   | ab    | a     | ab    | b     |
|                   | Mean       | 0.04  | 0.05  | 0.05  | 0.06  |
|                   | SD         | 0.02  | 0.02  | 0.02  | 0.04  |
|                   | p < 0.0001 | a     | bc    | ab    | c     |

Lower case letters (a–c) indicate differences between classes for  $p < 0.05$  independently for each feature.



**Table S21.** The values (mean  $\pm$ SD) of features of *Neighbouring Gray Tone Difference Matrix (NGTDM)* of output images, filtrated by *Normalize* filter, compared between four classes (0-3) of the Equine Odontoclastic Tooth Resorption and Hypercementosis (EOTRH) syndrome. When features differed significantly ( $p < 0.05$ ).

| Feature           | EOTRH | 0        | 1      | 2      | 3      |
|-------------------|-------|----------|--------|--------|--------|
| <b>Busyness</b>   | Mean  | 43.0     | 1.5    | 1.4    | 6.2    |
|                   | SD    | 439.6    | 11.6   | 3.7    | 10.4   |
|                   | p     | < 0.0001 | a      | b      | c      |
| <b>Coarseness</b> | Mean  | 904762   | 753846 | 621622 | 409836 |
|                   | SD    | 294951   | 431878 | 487182 | 495885 |
|                   | p     | < 0.0001 | a      | b      | c      |
| <b>Complexity</b> | Mean  | 0.00     | 0.00   | 0.00   | 0.03   |
|                   | SD    | 0.01     | 0.02   | 0.01   | 0.05   |
|                   | p     | < 0.0001 | a      | ab     | b      |
| <b>Contrast</b>   | Mean  | 0.0002   | 0.0003 | 0.0001 | 0.0015 |
|                   | SD    | 0.0023   | 0.0036 | 0.0002 | 0.0037 |
|                   | p     | < 0.0001 | a      | b      | bc     |
| <b>Strength</b>   | Mean  | 0.05     | 0.10   | 0.17   | 0.14   |
|                   | SD    | 0.20     | 0.26   | 0.36   | 0.31   |
|                   | p     | < 0.0001 | a      | b      | bc     |

Lower case letters (a-c) indicate differences between classes for  $p < 0.05$  independently for each feature.

**Table S22.** The values (mean  $\pm$ SD) of features of *Neighbouring Gray Tone Difference Matrix (NGTDM)* of output images, filtrated by *Bilateral* filter, compared between four classes (0-3) of the Equine Odontoclastic Tooth Resorption and Hypercementosis (EOTRH) syndrome. When features differed significantly ( $p < 0.05$ ).

| Feature           | EOTRH | 0        | 1     | 2     | 3     |
|-------------------|-------|----------|-------|-------|-------|
| <b>Busyness</b>   | Mean  | 24.4     | 16.7  | 20.2  | 14.3  |
|                   | SD    | 14.2     | 10.7  | 14.7  | 8.2   |
|                   | p     | < 0.0001 | a     | bc    | b     |
| <b>Coarseness</b> | Mean  | 0.006    | 0.006 | 0.005 | 0.005 |
|                   | SD    | 0.002    | 0.002 | 0.002 | 0.002 |
|                   | p     | < 0.0001 | ac    | a     | bc    |
| <b>Complexity</b> | Mean  | 2.05     | 3.10  | 3.43  | 4.65  |
|                   | SD    | 1.11     | 1.41  | 1.77  | 2.44  |
|                   | p     | < 0.0001 | a     | b     | b     |
| <b>Contrast</b>   | Mean  | 0.024    | 0.027 | 0.028 | 0.034 |
|                   | SD    | 0.011    | 0.011 | 0.012 | 0.017 |
|                   | p     | 0.0003   | a     | ab    | ab    |
| <b>Strength</b>   | Mean  | 0.029    | 0.039 | 0.037 | 0.049 |
|                   | SD    | 0.014    | 0.020 | 0.025 | 0.031 |
|                   | p     | < 0.0001 | a     | bc    | ab    |

Lower case letters (a-c) indicate differences between classes for  $p < 0.05$  independently for each feature.



**Table S23.** The values (mean  $\pm$ SD) of features of *Neighbouring Gray Tone Difference Matrix (NGTDM)* of output images, filtrated by *Binomial* filter, compared between four classes (0-3) of the Equine Odontoclastic Tooth Resorption and Hypercementosis (EOTRH) syndrome. When features differed significantly ( $p < 0.05$ ).

| Feature           | EOTRH | 0        | 1     | 2     | 3     |
|-------------------|-------|----------|-------|-------|-------|
| <b>Busyness</b>   | Mean  | 17.4     | 12.4  | 14.8  | 11.6  |
|                   | SD    | 7.5      | 7.7   | 8.5   | 6.9   |
|                   | p     | < 0.0001 | a     | bc    | c     |
| <b>Coarseness</b> | Mean  | 0.004    | 0.004 | 0.004 | 0.004 |
|                   | SD    | 0.001    | 0.002 | 0.002 | 0.002 |
|                   | p     | 0.0003   | a     | b     | a     |
| <b>Complexity</b> | Mean  | 6.97     | 8.11  | 8.25  | 11.11 |
|                   | SD    | 2.95     | 3.16  | 3.09  | 6.99  |
|                   | p     | < 0.0001 | a     | b     | b     |
| <b>Contrast</b>   | Mean  | 0.036    | 0.034 | 0.038 | 0.046 |
|                   | SD    | 0.013    | 0.011 | 0.015 | 0.021 |
|                   | p     | 0.0003   | a     | a     | ab    |
| <b>Strength</b>   | Mean  | 0.038    | 0.050 | 0.044 | 0.059 |
|                   | SD    | 0.016    | 0.022 | 0.024 | 0.036 |
|                   | p     | < 0.0001 | a     | b     | a     |

Lower case letters (a-c) indicate differences between classes for  $p < 0.05$  independently for each feature.

**Table S24.** The values (mean  $\pm$ SD) of features of *Neighbouring Gray Tone Difference Matrix (NGTDM)* of output images, filtrated by *CurvatureFlow* filter, compared between four classes (0-3) of the Equine Odontoclastic Tooth Resorption and Hypercementosis (EOTRH) syndrome. When features differed significantly ( $p < 0.05$ ).

| Feature           | EOTRH | 0        | 1     | 2     | 3     |
|-------------------|-------|----------|-------|-------|-------|
| <b>Busyness</b>   | Mean  | 14.7     | 11.0  | 12.7  | 10.2  |
|                   | SD    | 6.7      | 6.0   | 6.5   | 7.2   |
|                   | p     | < 0.0001 | a     | b     | a     |
| <b>Coarseness</b> | Mean  | 0.004    | 0.004 | 0.004 | 0.004 |
|                   | SD    | 0.001    | 0.002 | 0.002 | 0.002 |
|                   | p     | 0.0002   | a     | b     | a     |
| <b>Complexity</b> | Mean  | 9.17     | 9.84  | 10.37 | 14.59 |
|                   | SD    | 3.78     | 3.79  | 3.98  | 9.44  |
|                   | p     | 0.0005   | a     | ab    | bc    |
| <b>Contrast</b>   | Mean  | 0.035    | 0.034 | 0.037 | 0.044 |
|                   | SD    | 0.013    | 0.012 | 0.014 | 0.022 |
|                   | p     | 0.0125   | ab    | a     | ab    |
| <b>Strength</b>   | Mean  | 0.045    | 0.056 | 0.051 | 0.069 |
|                   | SD    | 0.019    | 0.025 | 0.028 | 0.043 |
|                   | p     | < 0.0001 | a     | bc    | ab    |

Lower case letters (a-c) indicate differences between classes for  $p < 0.05$  independently for each feature.



**Table S25.** The values (mean  $\pm$ SD) of features of *Neighbouring Gray Tone Difference Matrix (NGTDM)* of output images, filtrated by *LaplacianSharpening* filter, compared between four classes (0-3) of the Equine Odontoclastic Tooth Resorption and Hypercementosis (EOTRH) syndrome. When features differed significantly ( $p < 0.05$ ).

| Feature    | EOTRH |          | 0     | 1     | 2     | 3     |
|------------|-------|----------|-------|-------|-------|-------|
| Busyness   |       | Mean     | 6.58  | 5.28  | 5.76  | 4.84  |
|            |       | SD       | 3.47  | 3.28  | 3.00  | 3.34  |
|            | p     | < 0.0001 | a     | bc    | ab    | c     |
| Coarseness |       | Mean     | 0.004 | 0.004 | 0.004 | 0.004 |
|            |       | SD       | 0.001 | 0.002 | 0.002 | 0.002 |
|            | p     | < 0.0001 | a     | b     | a     | a     |
| Complexity |       | Mean     | 30.0  | 31.8  | 35.1  | 46.1  |
|            |       | SD       | 10.7  | 11.5  | 11.8  | 20.3  |
|            | p     | < 0.0001 | a     | ab    | b     | c     |
| Contrast   |       | Mean     | 0.051 | 0.048 | 0.049 | 0.066 |
|            |       | SD       | 0.017 | 0.017 | 0.015 | 0.047 |
|            | p     | 0.3212   | a     | a     | a     | a     |
| Strength   |       | Mean     | 0.089 | 0.116 | 0.106 | 0.138 |
|            |       | SD       | 0.035 | 0.057 | 0.057 | 0.086 |
|            | p     | < 0.0001 | a     | bc    | ab    | c     |

Lower case letters (a-c) indicate differences between classes for  $p < 0.05$  independently for each feature.

**Table S26.** The values (mean  $\pm$ SD) of features of *Neighbouring Gray Tone Difference Matrix (NGTDM)* of output images, filtrated by *DiscreteGaussian* filter, compared between four classes (0-3) of the Equine Odontoclastic Tooth Resorption and Hypercementosis (EOTRH) syndrome. When features differed significantly ( $p < 0.05$ ).

| Table 1: When features differed significantly ( $p < 0.05$ ). |       |          |       |       |       |
|---------------------------------------------------------------|-------|----------|-------|-------|-------|
| Feature                                                       | EOTRH | 0        | 1     | 2     | 3     |
| Busyness                                                      | Mean  | 18.1     | 13.5  | 16.3  | 12.4  |
|                                                               | SD    | 7.5      | 8.3   | 9.8   | 7.9   |
|                                                               | p     | < 0.0001 | a     | b     | b     |
| Coarseness                                                    | Mean  | 0.004    | 0.005 | 0.004 | 0.004 |
|                                                               | SD    | 0.001    | 0.002 | 0.002 | 0.002 |
|                                                               | p     | 0.0003   | a     | b     | a     |
| Complexity                                                    | Mean  | 6.06     | 7.11  | 7.16  | 9.73  |
|                                                               | SD    | 2.27     | 2.86  | 2.60  | 5.72  |
|                                                               | p     | < 0.0001 | a     | b     | b     |
| Contrast                                                      | Mean  | 0.034    | 0.034 | 0.039 | 0.045 |
|                                                               | SD    | 0.014    | 0.013 | 0.015 | 0.021 |
|                                                               | p     | < 0.0001 | a     | ab    | bc    |
| Strength                                                      | Mean  | 0.036    | 0.047 | 0.041 | 0.057 |
|                                                               | SD    | 0.015    | 0.022 | 0.021 | 0.037 |
|                                                               | p     | < 0.0001 | a     | bc    | ab    |

Lower case letters (a-c) indicate differences between classes for  $p < 0.05$  independently for each feature.



**Table S27.** The values (mean  $\pm$ SD) of features of *Neighbouring Gray Tone Difference Matrix (NGTDM)* of output images, filtrated by *SmoothingRecursiveGaussian* filter, compared between four classes (0-3) of the Equine Odontoclastic Tooth Resorption and Hypercementosis (EOTRH) syndrome. When features differed significantly ( $p < 0.05$ ).

| Feature           | EOTRH | 0        | 1     | 2     | 3     |
|-------------------|-------|----------|-------|-------|-------|
| <b>Busyness</b>   | Mean  | 18.9     | 13.5  | 16.9  | 12.7  |
|                   | SD    | 9.3      | 8.3   | 10.6  | 8.0   |
|                   | p     | < 0.0001 | a     | b     | a     |
| <b>Coarseness</b> | Mean  | 0.004    | 0.005 | 0.004 | 0.004 |
|                   | SD    | 0.001    | 0.002 | 0.002 | 0.002 |
|                   | p     | 0.0003   | a     | b     | a     |
| <b>Complexity</b> | Mean  | 5.97     | 7.04  | 7.06  | 9.61  |
|                   | SD    | 2.44     | 2.55  | 2.70  | 5.75  |
|                   | p     | < 0.0001 | a     | b     | b     |
| <b>Contrast</b>   | Mean  | 0.034    | 0.035 | 0.039 | 0.045 |
|                   | SD    | 0.015    | 0.013 | 0.015 | 0.020 |
|                   | p     | < 0.0001 | a     | a     | b     |
| <b>Strength</b>   | Mean  | 0.036    | 0.047 | 0.057 | 0.057 |
|                   | SD    | 0.015    | 0.022 | 0.038 | 0.038 |
|                   | p     | < 0.0001 | a     | b     | b     |

Lower case letters (a-c) indicate differences between classes for  $p < 0.05$  independently for each feature.



**Table S28.** The values (mean  $\pm$ SD) of features of *Gray Level Dependence Matrix (GLDM)* of output images, filtrated by *Mean* filter, compared between four classes (0-3) of the Equine Odontoclastic Tooth Resorption and Hypercementosis (EOTRH) syndrome. When features differed significantly ( $p < 0.05$ ).

| Feature | EOTRH | 0        | 1     | 2     | 3     |
|---------|-------|----------|-------|-------|-------|
| DE      | Mean  | 6.25     | 6.08  | 6.23  | 6.34  |
|         | SD    | 0.28     | 0.35  | 0.36  | 0.26  |
|         | p     | < 0.0001 | a     | b     | a     |
| DN      | Mean  | 154.9    | 69.9  | 84.4  | 80.6  |
|         | SD    | 826.0    | 38.3  | 44.9  | 27.8  |
|         | p     | < 0.0001 | a     | b     | a     |
| DNN     | Mean  | 0.04     | 0.04  | 0.04  | 0.04  |
|         | SD    | 0.01     | 0.01  | 0.01  | 0.01  |
|         | p     | 0.9466   | a     | ab    | a     |
| DV      | Mean  | 64.4     | 73.4  | 66.4  | 65.9  |
|         | SD    | 25.9     | 25.1  | 19.8  | 32.3  |
|         | p     | 0.0031   | a     | b     | ab    |
| GLN     | Mean  | 820.4    | 635.0 | 715.6 | 607.9 |
|         | SD    | 1560.0   | 368.7 | 432.3 | 307.0 |
|         | p     | 0.0268   | a     | b     | ab    |
| GLV     | Mean  | 0.82     | 0.79  | 0.87  | 1.19  |
|         | SD    | 0.73     | 0.29  | 0.28  | 0.62  |
|         | p     | < 0.0001 | a     | ab    | b     |
| HGLE    | Mean  | 12.0     | 14.4  | 15.4  | 19.0  |
|         | SD    | 4.0      | 4.3   | 4.6   | 6.4   |
|         | p     | < 0.0001 | a     | b     | c     |
| LDE     | Mean  | 302.2    | 292.5 | 283.8 | 275.8 |
|         | SD    | 107.3    | 88.8  | 83.3  | 128.4 |
|         | p     | 0.4497   | a     | ab    | a     |
| LDHGLE  | Mean  | 3436     | 4433  | 4712  | 5466  |
|         | SD    | 1607     | 1902  | 2080  | 2479  |
|         | p     | < 0.0001 | a     | b     | bc    |
| LDLGLE  | Mean  | 40.0     | 24.7  | 22.6  | 18.4  |
|         | SD    | 46.2     | 14.5  | 11.3  | 11.0  |
|         | p     | < 0.0001 | a     | b     | bc    |
| LGLE    | Mean  | 0.14     | 0.11  | 0.10  | 0.09  |
|         | SD    | 0.06     | 0.04  | 0.04  | 0.03  |
|         | p     | < 0.0001 | a     | b     | bc    |
| SDE     | Mean  | 0.03     | 0.04  | 0.04  | 0.04  |
|         | SD    | 0.01     | 0.01  | 0.01  | 0.02  |
|         | p     | < 0.0001 | a     | b     | ab    |
| SDHGLE  | Mean  | 0.42     | 0.50  | 0.47  | 0.71  |
|         | SD    | 0.20     | 0.25  | 0.24  | 0.50  |
|         | p     | < 0.0001 | a     | bc    | ab    |
| SDLGLE  | Mean  | 0.01     | 0.01  | 0.01  | 0.01  |
|         | SD    | 0.00     | 0.00  | 0.00  | 0.00  |
|         | p     | 0.1662   | a     | ab    | a     |

DE - dependence entropy; DN - dependence non-uniformity; DNN - dependence non-uniformity normalized; DV - dependence variance; GLN - gray level non-uniformity; GLV - gray level variance; HGLE - high gray level emphasis; LDE - large dependence emphasis; LDHGLE - large dependence high gray level emphasis; LDLGLE - large dependence low gray level emphasis; LGLE - low gray level emphasis; SDE - small dependence emphasis; SDHGLE - small dependence high gray level emphasis; SDLGLE - small dependence low gray level emphasis. Lower case letters (a-c) indicate differences between classes for  $p < 0.05$  independently for each feature.



**Table S29.** The values (mean  $\pm$ SD) of features of *Gray Level Dependence Matrix (GLDM)* of output images, filtrated by *Median* filter, compared between four classes (0-3) of the Equine Odontoclastic Tooth Resorption and Hypercementosis (EOTRH) syndrome. When features differed significantly ( $p < 0.05$ ).

| Feature |   | EOTRH    | 0     | 1     | 2     | 3     |
|---------|---|----------|-------|-------|-------|-------|
| DE      |   | Mean     | 6.26  | 6.11  | 6.25  | 6.36  |
|         |   | SD       | 0.27  | 0.34  | 0.35  | 0.24  |
|         | p | < 0.0001 | a     | b     | a     | a     |
| DN      |   | Mean     | 75.3  | 69.9  | 84.4  | 81.1  |
|         |   | SD       | 27.5  | 38.3  | 45.2  | 28.6  |
|         | p | < 0.0001 | a     | b     | a     | a     |
| DNN     |   | Mean     | 0.04  | 0.04  | 0.04  | 0.04  |
|         |   | SD       | 0.01  | 0.01  | 0.01  | 0.01  |
|         | p | 0.9214   | a     | a     | a     | a     |
| DV      |   | Mean     | 62.3  | 70.8  | 64.8  | 65.1  |
|         |   | SD       | 23.9  | 24.8  | 19.6  | 31.3  |
|         | p | 0.0135   | a     | b     | ab    | ab    |
| GLN     |   | Mean     | 657.1 | 628.5 | 705.1 | 600.7 |
|         |   | SD       | 311.3 | 363.3 | 426.3 | 304.8 |
|         | p | 0.0517   | a     | a     | a     | a     |
| GLV     |   | Mean     | 0.80  | 0.82  | 0.89  | 1.23  |
|         |   | SD       | 0.28  | 0.31  | 0.29  | 0.66  |
|         | p | < 0.0001 | a     | a     | a     | b     |
| HGLE    |   | Mean     | 12.3  | 14.9  | 15.6  | 19.4  |
|         |   | SD       | 3.7   | 4.3   | 4.7   | 7.1   |
|         | p | < 0.0001 | a     | b     | b     | c     |
| LDE     |   | Mean     | 284.2 | 282.7 | 274.9 | 270.3 |
|         |   | SD       | 97.0  | 86.4  | 82.3  | 126.3 |
|         | p | 0.6995   | a     | a     | a     | a     |
| LDHGLE  |   | Mean     | 3282  | 4404  | 4620  | 5457  |
|         |   | SD       | 1454  | 1888  | 2053  | 2666  |
|         | p | < 0.0001 | a     | b     | b     | b     |
| LDLGLE  |   | Mean     | 33.7  | 23.0  | 21.9  | 18.1  |
|         |   | SD       | 18.2  | 12.9  | 11.8  | 11.1  |
|         | p | < 0.0001 | a     | b     | b     | b     |
| LGLE    |   | Mean     | 0.13  | 0.11  | 0.10  | 0.09  |
|         |   | SD       | 0.06  | 0.04  | 0.04  | 0.03  |
|         | p | < 0.0001 | a     | b     | b     | b     |
| SDE     |   | Mean     | 0.04  | 0.04  | 0.04  | 0.05  |
|         |   | SD       | 0.01  | 0.01  | 0.01  | 0.02  |
|         | p | 0.0018   | a     | b     | ab    | b     |
| SDHGLE  |   | Mean     | 0.52  | 0.58  | 0.57  | 0.86  |
|         |   | SD       | 0.28  | 0.28  | 0.27  | 0.62  |
|         | p | 0.0103   | a     | ab    | ab    | b     |
| SDLGLE  |   | Mean     | 0.01  | 0.01  | 0.01  | 0.01  |
|         |   | SD       | 0.00  | 0.00  | 0.00  | 0.01  |
|         | p | 0.7173   | a     | a     | a     | a     |

DE - dependence entropy; DN - dependence non-uniformity; DNN - dependence non-uniformity normalized; DV - dependence variance; GLN - gray level non-uniformity; GLV - gray level variance; HGLE - high gray level emphasis; LDE - large dependence emphasis; LDHGLE - large dependence high gray level emphasis; LDLGLE - large dependence low gray level emphasis; LGLE - low gray level emphasis; SDE - small dependence emphasis; SDHGLE - small dependence high gray level emphasis; SDLGLE - small dependence low gray level emphasis. Lower case letters (a-c) indicate differences between classes for  $p < 0.05$  independently for each feature.



**Table S30.** The values (mean  $\pm$ SD) of features of *Gray Level Dependence Matrix (GLDM)* of output images, filtrated by *Normalize* filter, compared between four classes (0-3) of the Equine Odontoclastic Tooth Resorption and Hypercementosis (EOTRH) syndrome. When features differed significantly ( $p < 0.05$ ).

| Feature |   | EOTRH    | 0      | 1     | 2     | 3     |
|---------|---|----------|--------|-------|-------|-------|
| DE      |   | Mean     | 3.93   | 3.99  | 3.77  | 3.84  |
|         |   | SD       | 0.45   | 0.47  | 0.45  | 0.63  |
|         | p | < 0.0001 | a      | a     | b     | ab    |
| DN      |   | Mean     | 688.9  | 324.4 | 475.1 | 401.2 |
|         |   | SD       | 3565.0 | 483.9 | 585.6 | 377.2 |
|         | p | < 0.0001 | a      | b     | a     | a     |
| DNN     |   | Mean     | 0.14   | 0.13  | 0.16  | 0.17  |
|         |   | SD       | 0.08   | 0.08  | 0.08  | 0.09  |
|         | p | < 0.0001 | ab     | a     | b     | b     |
| DV      |   | Mean     | 65.5   | 66.4  | 66.4  | 72.1  |
|         |   | SD       | 6.5    | 7.4   | 7.1   | 12.7  |
|         | p | 0.0665   | a      | a     | a     | a     |
| GLN     |   | Mean     | 2432   | 1863  | 2254  | 1984  |
|         |   | SD       | 4710   | 1220  | 1435  | 847   |
|         | p | < 0.0001 | a      | b     | a     | a     |
| GLV     |   | Mean     | 0.003  | 0.002 | 0.002 | 0.014 |
|         |   | SD       | 0.024  | 0.015 | 0.006 | 0.025 |
|         | p | < 0.0001 | a      | b     | b     | c     |
| HGLE    |   | Mean     | 1.27   | 1.73  | 2.13  | 2.72  |
|         |   | SD       | 0.85   | 1.28  | 1.45  | 1.45  |
|         | p | < 0.0001 | a      | b     | bc    | c     |
| LDE     |   | Mean     | 1083   | 1024  | 1108  | 1122  |
|         |   | SD       | 128    | 127   | 122   | 137   |
|         | p | < 0.0001 | a      | b     | a     | a     |
| LDHGLE  |   | Mean     | 1387   | 1821  | 2411  | 3059  |
|         |   | SD       | 981    | 1463  | 1740  | 1664  |
|         | p | < 0.0001 | a      | a     | b     | c     |
| LDLGLE  |   | Mean     | 1007   | 825   | 782   | 637   |
|         |   | SD       | 255    | 333   | 399   | 444   |
|         | p | < 0.0001 | a      | b     | b     | b     |
| LGLE    |   | Mean     | 0.93   | 0.82  | 0.72  | 0.57  |
|         |   | SD       | 0.21   | 0.32  | 0.36  | 0.36  |
|         | p | < 0.0001 | a      | b     | bc    | c     |
| SDE     |   | Mean     | 0.001  | 0.002 | 0.002 | 0.004 |
|         |   | SD       | 0.000  | 0.001 | 0.002 | 0.004 |
|         | p | < 0.0001 | a      | b     | ab    | b     |
| SDHGLE  |   | Mean     | 0.002  | 0.003 | 0.004 | 0.006 |
|         |   | SD       | 0.002  | 0.003 | 0.004 | 0.005 |
|         | p | < 0.0001 | a      | b     | b     | b     |
| SDLGLE  |   | Mean     | 0.001  | 0.002 | 0.002 | 0.003 |
|         |   | SD       | 0.000  | 0.001 | 0.002 | 0.003 |
|         | p | 0.001    | a      | b     | a     | ab    |

DE - dependence entropy; DN - dependence non-uniformity; DNN - dependence non-uniformity normalized; DV - dependence variance; GLN - gray level non-uniformity; GLV - gray level variance; HGLE - high gray level emphasis; LDE - large dependence emphasis; LDHGLE - large dependence high gray level emphasis; LDLGLE - large dependence low gray level emphasis; LGLE - low gray level emphasis; SDE - small dependence emphasis; SDHGLE - small dependence high gray level emphasis; SDLGLE - small dependence low gray level emphasis. Lower case letters (a-c) indicate differences between classes for  $p < 0.05$  independently for each feature.



**Table S31.** The values (mean  $\pm$ SD) of features of *Gray Level Dependence Matrix (GLDM)* of output images, filtrated by *Bilateral* filter, compared between four classes (0-3) of the Equine Odontoclastic Tooth Resorption and Hypercementosis (EOTRH) syndrome. When features differed significantly ( $p < 0.05$ ).

| Feature | EOTRH | 0        | 1     | 2     | 3     |
|---------|-------|----------|-------|-------|-------|
| DE      | Mean  | 6.08     | 5.95  | 6.09  | 6.20  |
|         | SD    | 0.32     | 0.41  | 0.39  | 0.35  |
|         | p     | < 0.0001 | ac    | b     | c     |
| DN      | Mean  | 71.7     | 68.0  | 77.1  | 74.3  |
|         | SD    | 37.0     | 48.7  | 50.4  | 35.7  |
|         | p     | < 0.0001 | a     | b     | a     |
| DNN     | Mean  | 0.04     | 0.04  | 0.03  | 0.04  |
|         | SD    | 0.01     | 0.01  | 0.01  | 0.01  |
|         | p     | 0.0604   | a     | a     | a     |
| DV      | Mean  | 88.3     | 96.9  | 94.4  | 92.7  |
|         | SD    | 20.5     | 20.8  | 21.7  | 32.1  |
|         | p     | 0.0175   | a     | b     | ab    |
| GLN     | Mean  | 864.4    | 765.3 | 885.9 | 742.5 |
|         | SD    | 395.0    | 430.8 | 507.1 | 372.8 |
|         | p     | 0.0017   | a     | b     | a     |
| GLV     | Mean  | 0.46     | 0.54  | 0.57  | 0.82  |
|         | SD    | 0.18     | 0.22  | 0.21  | 0.45  |
|         | p     | < 0.0001 | a     | b     | c     |
| HGLE    | Mean  | 7.57     | 10.63 | 11.32 | 14.19 |
|         | SD    | 2.74     | 3.49  | 4.15  | 4.55  |
|         | p     | < 0.0001 | a     | b     | c     |
| LDE     | Mean  | 563.9    | 483.4 | 495.1 | 455.4 |
|         | SD    | 132.3    | 124.3 | 138.6 | 161.0 |
|         | p     | < 0.0001 | a     | b     | b     |
| LDHGLE  | Mean  | 4114     | 5502  | 5936  | 7002  |
|         | SD    | 1751     | 2287  | 2433  | 3078  |
|         | p     | < 0.0001 | a     | b     | bc    |
| LDLGLE  | Mean  | 108.4    | 57.7  | 58.1  | 40.5  |
|         | SD    | 53.6     | 38.3  | 39.5  | 23.8  |
|         | p     | < 0.0001 | a     | b     | b     |
| LGLE    | Mean  | 0.21     | 0.15  | 0.14  | 0.12  |
|         | SD    | 0.09     | 0.07  | 0.07  | 0.05  |
|         | p     | < 0.0001 | a     | b     | bc    |
| SDE     | Mean  | 0.01     | 0.02  | 0.02  | 0.02  |
|         | SD    | 0.01     | 0.01  | 0.01  | 0.01  |
|         | p     | < 0.0001 | a     | b     | b     |
| SDHGLE  | Mean  | 0.10     | 0.14  | 0.16  | 0.23  |
|         | SD    | 0.08     | 0.10  | 0.12  | 0.15  |
|         | p     | < 0.0001 | a     | b     | bc    |
| SDLGLE  | Mean  | 0.01     | 0.01  | 0.01  | 0.01  |
|         | SD    | 0.00     | 0.00  | 0.00  | 0.00  |
|         | p     | 0.0041   | a     | b     | ab    |

DE - dependence entropy; DN - dependence non-uniformity; DNN - dependence non-uniformity normalized; DV - dependence variance; GLN - gray level non-uniformity; GLV - gray level variance; HGLE - high gray level emphasis; LDE - large dependence emphasis; LDHGLE - large dependence high gray level emphasis; LDLGLE - large dependence low gray level emphasis; LGLE - low gray level emphasis; SDE - small dependence emphasis; SDHGLE - small dependence high gray level emphasis; SDLGLE - small dependence low gray level emphasis. Lower case letters (a-c) indicate differences between classes for  $p < 0.05$  independently for each feature.



**Table S32.** The values (mean  $\pm$ SD) of features of *Gray Level Dependence Matrix (GLDM)* of output images, filtrated by *Binomial* filter, compared between four classes (0-3) of the Equine Odontoclastic Tooth Resorption and Hypercementosis (EOTRH) syndrome. When features differed significantly ( $p < 0.05$ ).

| Feature |   | EOTRH    | 0     | 1     | 2     | 3     |
|---------|---|----------|-------|-------|-------|-------|
| DE      |   | Mean     | 6.25  | 6.09  | 6.24  | 6.34  |
|         |   | SD       | 0.27  | 0.35  | 0.35  | 0.25  |
|         | p | < 0.0001 | a     | b     | a     | a     |
| DN      |   | Mean     | 75.2  | 70.6  | 85.0  | 81.6  |
|         |   | SD       | 27.6  | 38.4  | 45.4  | 28.6  |
|         | p | < 0.0001 | a     | b     | a     | a     |
| DNN     |   | Mean     | 0.04  | 0.04  | 0.04  | 0.04  |
|         |   | SD       | 0.01  | 0.01  | 0.01  | 0.01  |
|         | p | 0.9692   | a     | a     | a     | a     |
| DV      |   | Mean     | 61.8  | 70.8  | 64.5  | 64.5  |
|         |   | SD       | 23.4  | 24.6  | 19.7  | 31.9  |
|         | p | 0.0059   | a     | b     | ab    | ab    |
| GLN     |   | Mean     | 661.3 | 628.0 | 706.8 | 602.3 |
|         |   | SD       | 312.4 | 364.8 | 427.9 | 306.6 |
|         | p | 0.0679   | a     | a     | a     | a     |
| GLV     |   | Mean     | 0.78  | 0.81  | 0.89  | 1.22  |
|         |   | SD       | 0.26  | 0.30  | 0.28  | 0.65  |
|         | p | < 0.0001 | a     | ab    | bc    | c     |
| HGLE    |   | Mean     | 12.1  | 14.8  | 15.5  | 19.4  |
|         |   | SD       | 3.7   | 4.3   | 4.8   | 6.5   |
|         | p | < 0.0001 | a     | b     | b     | c     |
| LDE     |   | Mean     | 286.1 | 282.0 | 274.6 | 268.6 |
|         |   | SD       | 95.5  | 86.1  | 81.6  | 126.9 |
|         | p | 0.5828   | a     | a     | a     | a     |
| LDHGLE  |   | Mean     | 3263  | 4377  | 4590  | 5375  |
|         |   | SD       | 1430  | 1855  | 1994  | 2391  |
|         | p | < 0.0001 | a     | b     | bc    | c     |
| LDLGLE  |   | Mean     | 34.1  | 22.7  | 21.8  | 17.6  |
|         |   | SD       | 18.0  | 11.9  | 10.9  | 10.6  |
|         | p | < 0.0001 | a     | b     | b     | b     |
| LGLE    |   | Mean     | 0.14  | 0.11  | 0.10  | 0.09  |
|         |   | SD       | 0.06  | 0.04  | 0.04  | 0.03  |
|         | p | < 0.0001 | a     | b     | bc    | c     |
| SDE     |   | Mean     | 0.03  | 0.04  | 0.04  | 0.04  |
|         |   | SD       | 0.01  | 0.01  | 0.01  | 0.02  |
|         | p | < 0.0001 | a     | ab    | b     | ab    |
| SDHGLE  |   | Mean     | 0.44  | 0.53  | 0.50  | 0.75  |
|         |   | SD       | 0.20  | 0.25  | 0.25  | 0.53  |
|         | p | 0.0015   | a     | b     | ab    | b     |
| SDLGLE  |   | Mean     | 0.009 | 0.009 | 0.009 | 0.009 |
|         |   | SD       | 0.004 | 0.004 | 0.004 | 0.005 |
|         | p | 0.7197   | a     | a     | a     | a     |

DE - dependence entropy; DN - dependence non-uniformity; DNN - dependence non-uniformity normalized; DV - dependence variance; GLN - gray level non-uniformity; GLV - gray level variance; HGLE - high gray level emphasis; LDE - large dependence emphasis; LDHGLE - large dependence high gray level emphasis; LDLGLE - large dependence low gray level emphasis; LGLE - low gray level emphasis; SDE - small dependence emphasis; SDHGLE - small dependence high gray level emphasis; SDLGLE - small dependence low gray level emphasis. Lower case letters (a-c) indicate differences between classes for  $p < 0.05$  independently for each feature.



**Table S33.** The values (mean  $\pm$ SD) of features of *Gray Level Dependence Matrix (GLDM)* of output images, filtrated by *CurvatureFlow* filter, compared between four classes (0-3) of the Equine Odontoclastic Tooth Resorption and Hypercementosis (EOTRH) syndrome. When features differed significantly ( $p < 0.05$ ).

| Feature |   | EOTRH    | 0     | 1     | 2     | 3     |
|---------|---|----------|-------|-------|-------|-------|
| DE      |   | Mean     | 6.27  | 6.12  | 6.26  | 6.37  |
|         |   | SD       | 0.26  | 0.33  | 0.33  | 0.23  |
|         | p | < 0.0001 | a     | b     | b     | c     |
| DN      |   | Mean     | 78.1  | 72.4  | 87.4  | 84.0  |
|         |   | SD       | 28.1  | 39.5  | 47.2  | 30.4  |
|         | p | < 0.0001 | a     | b     | a     | a     |
| DNN     |   | Mean     | 0.04  | 0.04  | 0.04  | 0.04  |
|         |   | SD       | 0.01  | 0.01  | 0.01  | 0.01  |
|         | p | 0.9037   | a     | a     | a     | a     |
| DV      |   | Mean     | 57.1  | 64.0  | 58.8  | 60.2  |
|         |   | SD       | 22.3  | 22.8  | 18.5  | 29.7  |
|         | p | 0.0334   | a     | b     | ab    | ab    |
| GLN     |   | Mean     | 632.5 | 605.8 | 682.3 | 583.2 |
|         |   | SD       | 306.8 | 354.3 | 417.0 | 299.1 |
|         | p | 0.0644   | a     | a     | a     | a     |
| GLV     |   | Mean     | 0.86  | 0.87  | 0.96  | 1.32  |
|         |   | SD       | 0.29  | 0.32  | 0.30  | 0.72  |
|         | p | < 0.0001 | a     | a     | ab    | b     |
| HGLE    |   | Mean     | 13.6  | 16.1  | 16.8  | 21.4  |
|         |   | SD       | 3.7   | 4.5   | 5.2   | 8.0   |
|         | p | < 0.0001 | a     | b     | b     | c     |
| LDE     |   | Mean     | 255.1 | 254.0 | 248.5 | 248.2 |
|         |   | SD       | 89.8  | 77.7  | 75.8  | 119.2 |
|         | p | 0.8154   | a     | a     | a     | a     |
| LDHGLE  |   | Mean     | 3241  | 4263  | 4516  | 5393  |
|         |   | SD       | 1373  | 1805  | 2109  | 2534  |
|         | p | < 0.0001 | a     | b     | bc    | c     |
| LDLGLE  |   | Mean     | 26.0  | 18.8  | 17.6  | 15.4  |
|         |   | SD       | 13.2  | 9.4   | 7.9   | 10.5  |
|         | p | < 0.0001 | a     | b     | b     | b     |
| LGLE    |   | Mean     | 0.12  | 0.10  | 0.09  | 0.08  |
|         |   | SD       | 0.04  | 0.03  | 0.03  | 0.03  |
|         | p | < 0.0001 | a     | b     | bc    | c     |
| SDE     |   | Mean     | 0.04  | 0.04  | 0.04  | 0.05  |
|         |   | SD       | 0.01  | 0.01  | 0.01  | 0.02  |
|         | p | 0.0063   | a     | b     | ab    | b     |
| SDHGLE  |   | Mean     | 0.60  | 0.64  | 0.62  | 0.97  |
|         |   | SD       | 0.28  | 0.28  | 0.28  | 0.72  |
|         | p | 0.0379   | a     | ab    | ab    | b     |
| SDLGLE  |   | Mean     | 0.009 | 0.009 | 0.009 | 0.009 |
|         |   | SD       | 0.005 | 0.004 | 0.004 | 0.005 |
|         | p | 0.5825   | a     | a     | a     | a     |

DE - dependence entropy; DN - dependence non-uniformity; DNN - dependence non-uniformity normalized; DV - dependence variance; GLN - gray level non-uniformity; GLV - gray level variance; HGLE - high gray level emphasis; LDE - large dependence emphasis; LDHGLE - large dependence high gray level emphasis; LDLGLE - large dependence low gray level emphasis; LGLE - low gray level emphasis; SDE - small dependence emphasis; SDHGLE - small dependence high gray level emphasis; SDLGLE - small dependence low gray level emphasis. Lower case letters (a-c) indicate differences between classes for  $p < 0.05$  independently for each feature.



**Table S34.** The values (mean  $\pm$ SD) of features of *Gray Level Dependence Matrix (GLDM)* of output images, filtrated by *LaplacianSharpening* filter, compared between four classes (0-3) of the Equine Odontoclastic Tooth Resorption and Hypercementosis (EOTRH) syndrome. When features differed significantly ( $p < 0.05$ ).

| Feature | EOTRH | 0        | 1     | 2     | 3     |
|---------|-------|----------|-------|-------|-------|
| DE      | Mean  | 6.21     | 6.10  | 6.19  | 6.31  |
|         | SD    | 0.19     | 0.23  | 0.23  | 0.18  |
|         | p     | < 0.0001 | ac    | b     | d     |
| DN      | Mean  | 111.7    | 105.6 | 126.7 | 122.0 |
|         | SD    | 43.0     | 61.8  | 73.7  | 47.1  |
|         | p     | < 0.0001 | a     | b     | a     |
| DNN     | Mean  | 0.06     | 0.06  | 0.06  | 0.06  |
|         | SD    | 0.01     | 0.01  | 0.01  | 0.02  |
|         | p     | 0.9146   | a     | a     | a     |
| DV      | Mean  | 27.1     | 27.4  | 27.3  | 27.1  |
|         | SD    | 9.2      | 8.0   | 9.0   | 12.6  |
|         | p     | 0.9308   | a     | a     | a     |
| GLN     | Mean  | 450.3    | 428.1 | 495.1 | 425.5 |
|         | SD    | 226.6    | 256.6 | 301.1 | 218.3 |
|         | p     | 0.0073   | ab    | a     | b     |
| GLV     | Mean  | 1.70     | 1.68  | 1.83  | 2.52  |
|         | SD    | 0.52     | 0.50  | 0.51  | 1.41  |
|         | p     | < 0.0001 | a     | a     | ab    |
| HGLE    | Mean  | 33.2     | 37.5  | 39.4  | 48.6  |
|         | SD    | 9.2      | 11.8  | 11.8  | 14.2  |
|         | p     | < 0.0001 | a     | b     | c     |
| LDE     | Mean  | 113.5    | 110.5 | 112.8 | 112.1 |
|         | SD    | 36.2     | 28.7  | 31.9  | 50.9  |
|         | p     | 0.9718   | a     | a     | a     |
| LDHGLE  | Mean  | 3547     | 4193  | 4580  | 5366  |
|         | SD    | 1522     | 1679  | 1763  | 2277  |
|         | p     | < 0.0001 | a     | b     | bc    |
| LDLGLE  | Mean  | 4.40     | 3.56  | 3.39  | 2.96  |
|         | SD    | 2.07     | 1.83  | 1.73  | 2.31  |
|         | p     | < 0.0001 | a     | b     | bc    |
| LGLE    | Mean  | 0.05     | 0.04  | 0.04  | 0.03  |
|         | SD    | 0.02     | 0.02  | 0.02  | 0.01  |
|         | p     | < 0.0001 | a     | b     | bc    |
| SDE     | Mean  | 0.07     | 0.08  | 0.08  | 0.08  |
|         | SD    | 0.02     | 0.01  | 0.02  | 0.02  |
|         | p     | 0.0261   | a     | b     | ab    |
| SDHGLE  | Mean  | 2.51     | 2.60  | 2.67  | 3.48  |
|         | SD    | 0.98     | 0.98  | 1.08  | 1.75  |
|         | p     | 0.0026   | a     | a     | b     |
| SDLGLE  | Mean  | 0.007    | 0.007 | 0.007 | 0.006 |
|         | SD    | 0.003    | 0.003 | 0.004 | 0.003 |
|         | p     | 0.111    | a     | a     | a     |

DE - dependence entropy; DN - dependence non-uniformity; DNN - dependence non-uniformity normalized; DV - dependence variance; GLN - gray level non-uniformity; GLV - gray level variance; HGLE - high gray level emphasis; LDE - large dependence emphasis; LDHGLE - large dependence high gray level emphasis; LDLGLE - large dependence low gray level emphasis; LGLE - low gray level emphasis; SDE - small dependence emphasis; SDHGLE - small dependence high gray level emphasis; SDLGLE - small dependence low gray level emphasis. Lower case letters (a–d) indicate differences between classes for  $p < 0.05$  independently for each feature.



**Table S35.** The values (mean  $\pm$ SD) of features of *Gray Level Dependence Matrix (GLDM)* of output images, filtrated by *DiscreteGaussian* filter, compared between four classes (0-3) of the Equine Odontoclastic Tooth Resorption and Hypercementosis (EOTRH) syndrome. When features differed significantly ( $p < 0.05$ ).

| Feature | EOTRH | 0        | 1     | 2     | 3     |
|---------|-------|----------|-------|-------|-------|
| DE      | Mean  | 6.24     | 6.08  | 6.22  | 6.32  |
|         | SD    | 0.28     | 0.35  | 0.36  | 0.26  |
|         | p     | < 0.0001 | a     | b     | a     |
| DN      | Mean  | 73.6     | 69.3  | 83.5  | 79.7  |
|         | SD    | 27.6     | 37.8  | 43.9  | 27.3  |
|         | p     | < 0.0001 | a     | b     | a     |
| DNN     | Mean  | 0.04     | 0.04  | 0.04  | 0.04  |
|         | SD    | 0.01     | 0.01  | 0.01  | 0.01  |
|         | p     | 0.8937   | a     | a     | a     |
| DV      | Mean  | 64.7     | 75.3  | 68.1  | 67.7  |
|         | SD    | 23.8     | 25.1  | 20.0  | 33.3  |
|         | p     | 0.001    | a     | b     | ab    |
| GLN     | Mean  | 64.7     | 75.3  | 68.1  | 67.7  |
|         | SD    | 23.8     | 25.1  | 20.0  | 33.3  |
|         | p     | 0.0323   | ab    | a     | b     |
| GLV     | Mean  | 0.72     | 0.77  | 0.85  | 1.16  |
|         | SD    | 0.25     | 0.28  | 0.27  | 0.60  |
|         | p     | < 0.0001 | a     | ab    | bc    |
| HGLE    | Mean  | 11.4     | 13.9  | 14.6  | 18.5  |
|         | SD    | 3.6      | 4.0   | 4.4   | 6.3   |
|         | p     | < 0.0001 | a     | b     | c     |
| LDE     | Mean  | 309.1    | 302.3 | 292.5 | 284.1 |
|         | SD    | 98.7     | 91.1  | 85.5  | 131.3 |
|         | p     | 0.3772   | a     | a     | a     |
| LDHGLE  | Mean  | 3371     | 4475  | 4588  | 5519  |
|         | SD    | 1515     | 1901  | 1824  | 2562  |
|         | p     | < 0.0001 | a     | b     | b     |
| LDLGLE  | Mean  | 39.4     | 26.1  | 24.8  | 20.5  |
|         | SD    | 21.1     | 15.2  | 12.8  | 14.9  |
|         | p     | < 0.0001 | a     | b     | bc    |
| LGLE    | Mean  | 0.15     | 0.11  | 0.11  | 0.09  |
|         | SD    | 0.06     | 0.04  | 0.04  | 0.04  |
|         | p     | < 0.0001 | a     | b     | bc    |
| SDE     | Mean  | 0.03     | 0.04  | 0.04  | 0.04  |
|         | SD    | 0.01     | 0.01  | 0.01  | 0.02  |
|         | p     | < 0.0001 | a     | b     | b     |
| SDHGLE  | Mean  | 0.37     | 0.45  | 0.43  | 0.66  |
|         | SD    | 0.17     | 0.22  | 0.22  | 0.48  |
|         | p     | < 0.0001 | a     | bc    | ab    |
| SDLGLE  | Mean  | 0.008    | 0.009 | 0.009 | 0.009 |
|         | SD    | 0.004    | 0.004 | 0.004 | 0.005 |
|         | p     | 0.3411   | a     | a     | a     |

DE - dependence entropy; DN - dependence non-uniformity; DNN - dependence non-uniformity normalized; DV - dependence variance; GLN - gray level non-uniformity; GLV - gray level variance; HGLE - high gray level emphasis; LDE - large dependence emphasis; LDHGLE - large dependence high gray level emphasis; LDLGLE - large dependence low gray level emphasis; LGLE - low gray level emphasis; SDE - small dependence emphasis; SDHGLE - small dependence high gray level emphasis; SDLGLE - small dependence low gray level emphasis. Lower case letters (a-c) indicate differences between classes for  $p < 0.05$  independently for each feature.



**Table S36.** The values (mean  $\pm$ SD) of features of *Gray Level Dependence Matrix (GLDM)* of output images, filtrated by *SmoothingRecursiveGaussian* filter, compared between four classes (0-3) of the Equine Odontoclastic Tooth Resorption and Hypercementosis (EOTRH) syndrome. When features differed significantly ( $p < 0.05$ ).

| Feature | EOTRH | 0        | 1     | 2     | 3     |
|---------|-------|----------|-------|-------|-------|
| DE      | Mean  | 6.24     | 6.07  | 6.22  | 6.33  |
|         | SD    | 0.27     | 0.36  | 0.37  | 0.26  |
|         | p     | < 0.0001 | a     | b     | a     |
| DN      | Mean  | 73.4     | 69.3  | 83.4  | 79.5  |
|         | SD    | 27.6     | 37.9  | 44.0  | 27.5  |
|         | p     | < 0.0001 | a     | b     | a     |
| DNN     | Mean  | 0.04     | 0.04  | 0.04  | 0.04  |
|         | SD    | 0.01     | 0.01  | 0.01  | 0.01  |
|         | p     | 0.8781   | a     | a     | a     |
| DV      | Mean  | 65.2     | 76.0  | 68.8  | 68.1  |
|         | SD    | 23.9     | 25.3  | 20.1  | 33.3  |
|         | p     | 0.0012   | a     | b     | ab    |
| GLN     | Mean  | 683.8    | 643.8 | 724.5 | 615.8 |
|         | SD    | 318.8    | 374.0 | 437.0 | 310.1 |
|         | p     | 0.0306   | ab    | a     | b     |
| GLV     | Mean  | 0.72     | 0.77  | 0.85  | 1.15  |
|         | SD    | 0.24     | 0.28  | 0.27  | 0.60  |
|         | p     | < 0.0001 | a     | ab    | bc    |
| HGLE    | Mean  | 11.2     | 13.8  | 14.5  | 18.4  |
|         | SD    | 3.9      | 3.8   | 4.6   | 6.4   |
|         | p     | < 0.0001 | a     | b     | c     |
| LDE     | Mean  | 312.0    | 304.3 | 294.4 | 285.6 |
|         | SD    | 99.2     | 91.2  | 86.1  | 131.1 |
|         | p     | 0.3672   | a     | a     | a     |
| LDHGLE  | Mean  | 3374     | 4475  | 4597  | 5526  |
|         | SD    | 1641     | 1901  | 1943  | 2624  |
|         | p     | < 0.0001 | a     | b     | b     |
| LDLGLE  | Mean  | 40.8     | 26.3  | 26.0  | 20.7  |
|         | SD    | 21.3     | 15.0  | 15.2  | 14.8  |
|         | p     | < 0.0001 | a     | b     | bc    |
| LGLE    | Mean  | 0.15     | 0.11  | 0.11  | 0.09  |
|         | SD    | 0.06     | 0.04  | 0.05  | 0.04  |
|         | p     | < 0.0001 | a     | b     | bc    |
| SDE     | Mean  | 0.03     | 0.04  | 0.04  | 0.04  |
|         | SD    | 0.01     | 0.01  | 0.01  | 0.02  |
|         | p     | < 0.0001 | a     | b     | b     |
| SDHGLE  | Mean  | 0.37     | 0.45  | 0.43  | 0.67  |
|         | SD    | 0.17     | 0.21  | 0.24  | 0.48  |
|         | p     | 0.0001   | a     | ab    | a     |
| SDLGLE  | Mean  | 0.008    | 0.009 | 0.009 | 0.009 |
|         | SD    | 0.004    | 0.004 | 0.004 | 0.005 |
|         | p     | 0.2527   | a     | a     | a     |

DE - dependence entropy; DN - dependence non-uniformity; DNN - dependence non-uniformity normalized; DV - dependence variance; GLN - gray level non-uniformity; GLV - gray level variance; HGLE - high gray level emphasis; LDE - large dependence emphasis; LDHGLE - large dependence high gray level emphasis; LDLGLE - large dependence low gray level emphasis; LGLE - low gray level emphasis; SDE - small dependence emphasis; SDHGLE - small dependence high gray level emphasis; SDLGLE - small dependence low gray level emphasis. Lower case letters (a-c) indicate differences between classes for  $p < 0.05$  independently for each feature.



**Table S37.** The values (mean  $\pm$ SD) of features of *Gray Level Run Length Matrix (GLRLM)* of output images, filtrated by *Mean* filter, compared between four classes (0-3) of the Equine Odontoclastic Tooth Resorption and Hypercementosis (EOTRH) syndrome. When features differed significantly ( $p < 0.05$ ).

| Feature | EOTRH | 0        | 1     | 2     | 3     |
|---------|-------|----------|-------|-------|-------|
| GLN     | Mean  | 163.8    | 134.2 | 154.9 | 136.6 |
|         | SD    | 187.0    | 65.2  | 78.3  | 50.0  |
|         | p     | 0.0014   | a     | b     | ab    |
| GLNN    | Mean  | 0.30     | 0.28  | 0.27  | 0.25  |
|         | SD    | 0.04     | 0.03  | 0.03  | 0.04  |
|         | p     | < 0.0001 | a     | b     | c     |
| GLV     | Mean  | 0.96     | 1.04  | 1.07  | 1.32  |
|         | SD    | 0.47     | 0.27  | 0.29  | 0.49  |
|         | p     | < 0.0001 | a     | b     | c     |
| HGLRE   | Mean  | 12.3     | 13.4  | 14.2  | 17.3  |
|         | SD    | 4.5      | 3.9   | 4.1   | 5.9   |
|         | p     | < 0.0001 | a     | b     | c     |
| LRE     | Mean  | 46.1     | 49.8  | 46.7  | 39.4  |
|         | SD    | 34.2     | 23.7  | 22.7  | 23.0  |
|         | p     | 0.0101   | ab    | a     | b     |
| LRHGLE  | Mean  | 515.4    | 732.3 | 751.2 | 726.6 |
|         | SD    | 317.8    | 442.5 | 453.3 | 406.9 |
|         | p     | < 0.0001 | a     | b     | b     |
| LRLGLE  | Mean  | 7.93     | 4.68  | 4.24  | 3.04  |
|         | SD    | 25.48    | 2.81  | 2.82  | 2.07  |
|         | p     | < 0.0001 | a     | ab    | b     |
| LGLRE   | Mean  | 0.15     | 0.14  | 0.13  | 0.11  |
|         | SD    | 0.06     | 0.05  | 0.05  | 0.04  |
|         | p     | < 0.0001 | a     | ab    | bc    |
| RE      | Mean  | 4.89     | 4.77  | 4.91  | 4.97  |
|         | SD    | 0.31     | 0.30  | 0.29  | 0.24  |
|         | p     | < 0.0001 | a     | b     | a     |
| RLN     | Mean  | 108.9    | 89.6  | 96.7  | 104.6 |
|         | SD    | 249.2    | 43.1  | 45.4  | 56.7  |
|         | p     | 0.1997   | a     | a     | a     |
| RLNN    | Mean  | 0.16     | 0.17  | 0.16  | 0.18  |
|         | SD    | 0.03     | 0.03  | 0.03  | 0.06  |
|         | p     | < 0.0001 | a     | b     | a     |
| RP      | Mean  | 0.26     | 0.27  | 0.27  | 0.28  |
|         | SD    | 0.05     | 0.04  | 0.04  | 0.08  |
|         | p     | 0.0877   | a     | a     | a     |
| RV      | Mean  | 23.6     | 26.0  | 22.7  | 18.8  |
|         | SD    | 28.1     | 15.6  | 14.9  | 12.8  |
|         | p     | 0.0007   | a     | b     | ab    |
| SRE     | Mean  | 0.32     | 0.35  | 0.33  | 0.35  |
|         | SD    | 0.05     | 0.05  | 0.05  | 0.09  |
|         | p     | < 0.0001 | a     | b     | a     |
| SRHGLE  | Mean  | 3.85     | 4.07  | 4.14  | 5.75  |
|         | SD    | 1.81     | 1.54  | 1.44  | 3.46  |
|         | p     | 0.0019   | a     | ab    | ab    |
| SRLGLE  | Mean  | 0.05     | 0.06  | 0.05  | 0.05  |
|         | SD    | 0.02     | 0.03  | 0.02  | 0.02  |
|         | p     | < 0.0001 | a     | b     | a     |

GLN - gray level non-uniformity; GLNN - gray level non-uniformity normalized; GLV - gray level variance; HGLRE - high gray level run emphasis; LRE - long run emphasis; LRHGLE - long run high gray level emphasis; LRLGLE - long run low gray level emphasis; LGLRE - low gray level run emphasis; RE - run entropy; RLN - run length non-uniformity; RLNN - run length non-uniformity normalized; RP - run percentage; RV - run variance; SRE - short run emphasis; SRHGLE - short run high gray level emphasis; SRLGLE - short run low gray level emphasis. Lower case letters (a-c) indicate differences between classes for  $p < 0.05$  independently for each feature.



**Table S38.** The values (mean  $\pm$ SD) of features of *Gray Level Run Length Matrix (GLRLM)* of output images, filtrated by *Median* filter, compared between four classes (0-3) of the Equine Odontoclastic Tooth Resorption and Hypercementosis (EOTRH) syndrome. When features differed significantly ( $p < 0.05$ ).

| Feature | EOTRH | 0        | 1     | 2     | 3     |
|---------|-------|----------|-------|-------|-------|
| GLN     | Mean  | 143.4    | 131.7 | 154.0 | 134.3 |
|         | SD    | 49.3     | 65.0  | 78.6  | 49.5  |
|         | p     | 0.0009   | a     | b     | a     |
| GLNN    | Mean  | 0.29     | 0.28  | 0.27  | 0.25  |
|         | SD    | 0.04     | 0.03  | 0.03  | 0.04  |
|         | p     | < 0.0001 | a     | b     | c     |
| GLV     | Mean  | 0.98     | 1.08  | 1.10  | 1.38  |
|         | SD    | 0.26     | 0.29  | 0.30  | 0.54  |
|         | p     | < 0.0001 | a     | b     | c     |
| HGLRE   | Mean  | 12.4     | 14.0  | 14.5  | 17.7  |
|         | SD    | 3.6      | 3.9   | 4.2   | 6.5   |
|         | p     | < 0.0001 | a     | b     | c     |
| LRE     | Mean  | 39.4     | 43.5  | 41.7  | 36.8  |
|         | SD    | 17.2     | 18.2  | 20.2  | 20.7  |
|         | p     | 0.053    | a     | a     | a     |
| LRHGLE  | Mean  | 459.0    | 659.6 | 685.2 | 696.1 |
|         | SD    | 221.1    | 349.0 | 417.7 | 409.0 |
|         | p     | < 0.0001 | a     | b     | b     |
| LRLGLE  | Mean  | 4.95     | 3.97  | 3.75  | 2.87  |
|         | SD    | 3.02     | 2.20  | 2.41  | 1.92  |
|         | p     | < 0.0001 | a     | ab    | bc    |
| LGLRE   | Mean  | 0.15     | 0.13  | 0.12  | 0.11  |
|         | SD    | 0.06     | 0.05  | 0.05  | 0.04  |
|         | p     | 0.0002   | a     | ab    | bc    |
| RE      | Mean  | 4.90     | 4.82  | 4.94  | 5.01  |
|         | SD    | 0.24     | 0.28  | 0.27  | 0.21  |
|         | p     | < 0.0001 | a     | b     | ac    |
| RLN     | Mean  | 83.6     | 84.6  | 94.3  | 98.6  |
|         | SD    | 33.5     | 42.7  | 45.5  | 48.9  |
|         | p     | 0.0624   | a     | a     | a     |
| RLNN    | Mean  | 0.16     | 0.17  | 0.16  | 0.17  |
|         | SD    | 0.03     | 0.03  | 0.03  | 0.05  |
|         | p     | 0.006    | a     | b     | ab    |
| RP      | Mean  | 0.26     | 0.27  | 0.26  | 0.28  |
|         | SD    | 0.04     | 0.04  | 0.04  | 0.07  |
|         | p     | 0.4159   | a     | a     | a     |
| RV      | Mean  | 19.0     | 22.3  | 20.0  | 17.3  |
|         | SD    | 10.9     | 11.9  | 13.1  | 11.3  |
|         | p     | 0.0027   | a     | b     | ab    |
| SRE     | Mean  | 0.32     | 0.34  | 0.32  | 0.34  |
|         | SD    | 0.05     | 0.04  | 0.05  | 0.08  |
|         | p     | 0.0071   | a     | b     | a     |
| SRHGLE  | Mean  | 3.96     | 4.22  | 4.20  | 5.76  |
|         | SD    | 1.58     | 1.61  | 1.42  | 3.32  |
|         | p     | 0.0106   | a     | ab    | ab    |
| SRLGLE  | Mean  | 0.05     | 0.06  | 0.05  | 0.04  |
|         | SD    | 0.02     | 0.02  | 0.02  | 0.02  |
|         | p     | 0.0018   | ab    | a     | ab    |

GLN - gray level non-uniformity; GLNN - gray level non-uniformity normalized; GLV - gray level variance; HGLRE - high gray level run emphasis; LRE - long run emphasis; LRHGLE - long run high gray level emphasis; LRLGLE - long run low gray level emphasis; LGLRE - low gray level run emphasis; RE - run entropy; RLN - run length non-uniformity; RLNN - run length non-uniformity normalized; RP - run percentage; RV - run variance; SRE - short run emphasis; SRHGLE - short run high gray level emphasis; SRLGLE - short run low gray level emphasis. Lower case letters (a-c) indicate differences between classes for  $p < 0.05$  independently for each feature.



**Table S39.** The values (mean  $\pm$ SD) of features of *Gray Level Run Length Matrix (GLRLM)* of output images, filtrated by *Normalize* filter, compared between four classes (0-3) of the Equine Odontoclastic Tooth Resorption and Hypercementosis (EOTRH) syndrome. When features differed significantly ( $p < 0.05$ ).

| Feature | EOTRH | 0        | 1     | 2     | 3     |
|---------|-------|----------|-------|-------|-------|
| GLN     | Mean  | 110.1    | 88.3  | 91.0  | 82.8  |
|         | SD    | 206.7    | 29.1  | 31.4  | 20.1  |
|         | p     | 0.0068   | a     | b     | ab    |
| GLNN    | Mean  | 0.99     | 0.97  | 0.95  | 0.86  |
|         | SD    | 0.05     | 0.08  | 0.10  | 0.17  |
|         | p     | < 0.0001 | a     | b     | c     |
| GLV     | Mean  | 0.00     | 0.02  | 0.03  | 0.07  |
|         | SD    | 0.03     | 0.04  | 0.05  | 0.08  |
|         | p     | < 0.0001 | a     | b     | c     |
| HGLRE   | Mean  | 1.26     | 1.68  | 2.04  | 2.49  |
|         | SD    | 0.83     | 1.20  | 1.35  | 1.28  |
|         | p     | < 0.0001 | a     | b     | bc    |
| LRE     | Mean  | 1055     | 1192  | 1332  | 1060  |
|         | SD    | 538      | 913   | 918   | 712   |
|         | p     | 0.0599   | a     | a     | a     |
| LRHGLE  | Mean  | 1364     | 2396  | 2956  | 2724  |
|         | SD    | 1251     | 3550  | 3189  | 2820  |
|         | p     | < 0.0001 | a     | a     | b     |
| LRLGLE  | Mean  | 977.6    | 890.4 | 926.0 | 644.7 |
|         | SD    | 555.6    | 675.7 | 863.6 | 602.0 |
|         | p     | 0.0002   | a     | a     | b     |
| LGLRE   | Mean  | 0.93     | 0.83  | 0.74  | 0.63  |
|         | SD    | 0.21     | 0.30  | 0.34  | 0.32  |
|         | p     | < 0.0001 | a     | b     | bc    |
| RE      | Mean  | 4.53     | 4.21  | 4.24  | 4.47  |
|         | SD    | 0.39     | 0.41  | 0.50  | 0.31  |
|         | p     | < 0.0001 | a     | b     | a     |
| RLN     | Mean  | 9.11     | 7.43  | 7.66  | 7.41  |
|         | SD    | 35.86    | 3.91  | 2.52  | 4.07  |
|         | p     | < 0.0001 | a     | b     | c     |
| RLNN    | Mean  | 0.06     | 0.08  | 0.08  | 0.07  |
|         | SD    | 0.02     | 0.03  | 0.03  | 0.02  |
|         | p     | < 0.0001 | a     | b     | b     |
| RP      | Mean  | 0.05     | 0.06  | 0.05  | 0.06  |
|         | SD    | 0.01     | 0.01  | 0.01  | 0.02  |
|         | p     | < 0.0001 | a     | b     | a     |
| RV      | Mean  | 218.3    | 257.8 | 258.4 | 223.0 |
|         | SD    | 171.7    | 259.5 | 220.4 | 147.0 |
|         | p     | 0.9374   | a     | a     | a     |
| SRE     | Mean  | 0.03     | 0.03  | 0.04  | 0.08  |
|         | SD    | 0.03     | 0.04  | 0.05  | 0.09  |
|         | p     | 0.0239   | ab    | ab    | a     |
| SRHGLE  | Mean  | 0.04     | 0.05  | 0.06  | 0.14  |
|         | SD    | 0.07     | 0.09  | 0.10  | 0.16  |
|         | p     | 0.0649   | a     | a     | a     |
| SRLGLE  | Mean  | 0.02     | 0.03  | 0.03  | 0.06  |
|         | SD    | 0.02     | 0.03  | 0.04  | 0.07  |
|         | p     | 0.0074   | ab    | ab    | a     |

GLN - gray level non-uniformity; GLNN - gray level non-uniformity normalized; GLV - gray level variance; HGLRE - high gray level run emphasis; LRE - long run emphasis; LRHGLE - long run high gray level emphasis; LRLGLE - long run low gray level emphasis; LGLRE - low gray level run emphasis; RE - run entropy; RLN - run length non-uniformity; RLNN - run length non-uniformity normalized; RP - run percentage; RV - run variance; SRE - short run emphasis; SRHGLE - short run high gray level emphasis; SRLGLE - short run low gray level emphasis. Lower case letters (a-c) indicate differences between classes for  $p < 0.05$  independently for each feature.



**Table S40.** The values (mean  $\pm$ SD) of features of *Gray Level Run Length Matrix (GLRLM)* of output images, filtrated by *Bilateral* filter, compared between four classes (0-3) of the Equine Odontoclastic Tooth Resorption and Hypercementosis (EOTRH) syndrome. When features differed significantly ( $p < 0.05$ ).

| Feature | EOTRH | 0        | 1     | 2     | 3     |
|---------|-------|----------|-------|-------|-------|
| GLN     | Mean  | 98.5     | 97.7  | 112.6 | 105.9 |
|         | SD    | 28.9     | 41.5  | 49.2  | 36.6  |
|         | p     | 0.0022   | ab    | a     | b     |
| GLNN    | Mean  | 0.36     | 0.33  | 0.32  | 0.29  |
|         | SD    | 0.05     | 0.04  | 0.04  | 0.04  |
|         | p     | < 0.0001 | a     | b     | c     |
| GLV     | Mean  | 0.63     | 0.76  | 0.77  | 0.96  |
|         | SD    | 0.18     | 0.21  | 0.24  | 0.30  |
|         | p     | < 0.0001 | a     | b     | c     |
| HGLRE   | Mean  | 7.44     | 9.23  | 9.86  | 12.17 |
|         | SD    | 2.57     | 2.87  | 3.48  | 3.80  |
|         | p     | < 0.0001 | a     | b     | c     |
| LRE     | Mean  | 134.8    | 131.1 | 120.6 | 99.0  |
|         | SD    | 64.0     | 83.3  | 56.5  | 67.6  |
|         | p     | 0.0024   | a     | a     | b     |
| LRHGLE  | Mean  | 967      | 1446  | 1413  | 1437  |
|         | SD    | 577      | 1190  | 902   | 1116  |
|         | p     | < 0.0001 | a     | b     | b     |
| LRLGLE  | Mean  | 26.4     | 17.0  | 15.0  | 9.5   |
|         | SD    | 16.8     | 15.0  | 10.5  | 7.5   |
|         | p     | < 0.0001 | a     | b     | c     |
| LGLRE   | Mean  | 0.25     | 0.21  | 0.19  | 0.15  |
|         | SD    | 0.10     | 0.10  | 0.09  | 0.06  |
|         | p     | < 0.0001 | a     | b     | c     |
| RE      | Mean  | 5.12     | 4.88  | 5.04  | 5.09  |
|         | SD    | 0.31     | 0.39  | 0.42  | 0.27  |
|         | p     | < 0.0001 | a     | b     | a     |
| RLN     | Mean  | 27.9     | 36.7  | 39.3  | 48.9  |
|         | SD    | 11.1     | 18.0  | 15.4  | 31.5  |
|         | p     | < 0.0001 | a     | b     | b     |
| RLNN    | Mean  | 0.09     | 0.12  | 0.11  | 0.12  |
|         | SD    | 0.02     | 0.03  | 0.03  | 0.04  |
|         | p     | < 0.0001 | a     | b     | b     |
| RP      | Mean  | 0.15     | 0.17  | 0.17  | 0.19  |
|         | SD    | 0.03     | 0.04  | 0.04  | 0.06  |
|         | p     | < 0.0001 | a     | b     | b     |
| RV      | Mean  | 66.0     | 70.4  | 59.7  | 48.8  |
|         | SD    | 36.0     | 53.6  | 31.0  | 37.2  |
|         | p     | 0.002    | a     | b     | a     |
| SRE     | Mean  | 0.23     | 0.27  | 0.26  | 0.28  |
|         | SD    | 0.06     | 0.06  | 0.06  | 0.08  |
|         | p     | < 0.0001 | a     | b     | b     |
| SRHGLE  | Mean  | 1.53     | 1.92  | 2.11  | 2.97  |
|         | SD    | 0.76     | 0.84  | 1.10  | 1.79  |
|         | p     | < 0.0001 | a     | b     | c     |
| SRLGLE  | Mean  | 0.08     | 0.08  | 0.07  | 0.06  |
|         | SD    | 0.04     | 0.04  | 0.03  | 0.02  |
|         | p     | < 0.0001 | a     | a     | ab    |

GLN - gray level non-uniformity; GLNN - gray level non-uniformity normalized; GLV - gray level variance; HGLRE - high gray level run emphasis; LRE - long run emphasis; LRHGLE - long run high gray level emphasis; LRLGLE - long run low gray level emphasis; LGLRE - low gray level run emphasis; RE - run entropy; RLN - run length non-uniformity; RLNN - run length non-uniformity normalized; RP - run percentage; RV - run variance; SRE - short run emphasis; SRHGLE - short run high gray level emphasis; SRLGLE - short run low gray level emphasis. Lower case letters (a-c) indicate differences between classes for  $p < 0.05$  independently for each feature.



**Table S41.** The values (mean  $\pm$ SD) of features of *Gray Level Run Length Matrix (GLRLM)* of output images, filtrated by *Binomial* filter, compared between four classes (0-3) of the Equine Odontoclastic Tooth Resorption and Hypercementosis (EOTRH) syndrome. When features differed significantly ( $p < 0.05$ ).

| Feature | EOTRH | 0        | 1     | 2     | 3     |
|---------|-------|----------|-------|-------|-------|
| GLN     | Mean  | 151.8    | 138.9 | 162.5 | 142.1 |
|         | SD    | 51.9     | 69.1  | 84.4  | 52.8  |
|         | p     | 0.0008   | a     | b     | a     |
| GLNN    | Mean  | 0.29     | 0.28  | 0.27  | 0.25  |
|         | SD    | 0.04     | 0.03  | 0.03  | 0.04  |
|         | p     | < 0.0001 | a     | b     | c     |
| GLV     | Mean  | 0.95     | 1.06  | 1.09  | 1.35  |
|         | SD    | 0.25     | 0.28  | 0.29  | 0.51  |
|         | p     | < 0.0001 | a     | b     | c     |
| HGLRE   | Mean  | 12.2     | 13.8  | 14.4  | 17.7  |
|         | SD    | 3.6      | 3.8   | 4.2   | 6.0   |
|         | p     | < 0.0001 | a     | b     | c     |
| LRE     | Mean  | 38.7     | 43.9  | 41.2  | 35.4  |
|         | SD    | 17.5     | 19.8  | 20.8  | 20.7  |
|         | p     | < 0.0001 | a     | b     | c     |
| LRHGLE  | Mean  | 445.2    | 657.9 | 671.1 | 659.2 |
|         | SD    | 222.1    | 363.2 | 418.1 | 367.1 |
|         | p     | < 0.0001 | a     | b     | b     |
| LRLGLE  | Mean  | 4.84     | 3.99  | 3.72  | 2.71  |
|         | SD    | 2.86     | 2.30  | 2.45  | 1.82  |
|         | p     | < 0.0001 | a     | ac    | b     |
| LGLRE   | Mean  | 0.15     | 0.13  | 0.12  | 0.11  |
|         | SD    | 0.06     | 0.04  | 0.05  | 0.04  |
|         | p     | < 0.0001 | a     | ab    | bc    |
| RE      | Mean  | 4.83     | 4.75  | 4.86  | 4.93  |
|         | SD    | 0.26     | 0.29  | 0.27  | 0.24  |
|         | p     | < 0.0001 | a     | b     | a     |
| RLN     | Mean  | 94.9     | 97.0  | 108.7 | 116.8 |
|         | SD    | 39.3     | 50.5  | 54.0  | 65.6  |
|         | p     | 0.0712   | a     | a     | a     |
| RLNN    | Mean  | 0.17     | 0.18  | 0.17  | 0.19  |
|         | SD    | 0.03     | 0.03  | 0.03  | 0.06  |
|         | p     | 0.0064   | a     | b     | ab    |
| RP      | Mean  | 0.27     | 0.28  | 0.28  | 0.30  |
|         | SD    | 0.05     | 0.04  | 0.04  | 0.08  |
|         | p     | 0.3833   | a     | a     | a     |
| RV      | Mean  | 18.9     | 22.9  | 20.2  | 17.0  |
|         | SD    | 11.1     | 13.3  | 13.8  | 11.6  |
|         | p     | 0.0007   | a     | b     | ab    |
| SRE     | Mean  | 0.34     | 0.36  | 0.35  | 0.37  |
|         | SD    | 0.05     | 0.05  | 0.05  | 0.09  |
|         | p     | 0.0122   | a     | b     | ab    |
| SRHGLE  | Mean  | 4.11     | 4.45  | 4.56  | 6.32  |
|         | SD    | 1.61     | 1.66  | 1.55  | 3.80  |
|         | p     | 0.0015   | a     | ab    | ab    |
| SRLGLE  | Mean  | 0.06     | 0.06  | 0.05  | 0.05  |
|         | SD    | 0.02     | 0.02  | 0.02  | 0.02  |
|         | p     | 0.0003   | a     | a     | ab    |

GLN - gray level non-uniformity; GLNN - gray level non-uniformity normalized; GLV - gray level variance; HGLRE - high gray level run emphasis; LRE - long run emphasis; LRHGLE - long run high gray level emphasis; LRLGLE - long run low gray level emphasis; LGLRE - low gray level run emphasis; RE - run entropy; RLN - run length non-uniformity; RLNN - run length non-uniformity normalized; RP - run percentage; RV - run variance; SRE - short run emphasis; SRHGLE - short run high gray level emphasis; SRLGLE - short run low gray level emphasis. Lower case letters (a-c) indicate differences between classes for  $p < 0.05$  independently for each feature.



**Table S42.** The values (mean  $\pm$ SD) of features of *Gray Level Run Length Matrix (GLRLM)* of output images, filtrated by *CurvatureFlow* filter, compared between four classes (0-3) of the Equine Odontoclastic Tooth Resorption and Hypercementosis (EOTRH) syndrome. When features differed significantly ( $p < 0.05$ ).

| Feature | EOTRH | 0        | 1     | 2     | 3     |
|---------|-------|----------|-------|-------|-------|
| GLN     | Mean  | 171.4    | 157.2 | 188.6 | 163.2 |
|         | SD    | 57.4     | 78.4  | 98.9  | 61.7  |
|         | p     | 0.0002   | a     | b     | ab    |
| GLNN    | Mean  | 0.28     | 0.27  | 0.26  | 0.24  |
|         | SD    | 0.03     | 0.03  | 0.03  | 0.04  |
|         | p     | < 0.0001 | a     | ab    | bc    |
| GLV     | Mean  | 1.05     | 1.13  | 1.18  | 1.49  |
|         | SD    | 0.27     | 0.30  | 0.31  | 0.62  |
|         | p     | < 0.0001 | a     | ab    | b     |
| HGLRE   | Mean  | 13.8     | 15.4  | 16.0  | 20.0  |
|         | SD    | 3.8      | 4.2   | 4.7   | 7.4   |
|         | p     | < 0.0001 | a     | b     | c     |
| LRE     | Mean  | 24.6     | 27.1  | 25.7  | 22.8  |
|         | SD    | 11.0     | 10.8  | 12.9  | 12.7  |
|         | p     | 0.0127   | ab    | a     | ab    |
| LRHGLE  | Mean  | 321.5    | 443.2 | 455.3 | 463.5 |
|         | SD    | 159.8    | 225.6 | 272.7 | 252.6 |
|         | p     | < 0.0001 | a     | b     | b     |
| LRLGLE  | Mean  | 2.61     | 2.27  | 2.06  | 1.67  |
|         | SD    | 1.37     | 1.20  | 1.18  | 1.22  |
|         | p     | < 0.0001 | a     | ab    | bc    |
| LGLRE   | Mean  | 0.13     | 0.11  | 0.11  | 0.10  |
|         | SD    | 0.04     | 0.04  | 0.04  | 0.04  |
|         | p     | < 0.0001 | a     | ab    | bc    |
| RE      | Mean  | 4.67     | 4.63  | 4.70  | 4.76  |
|         | SD    | 0.24     | 0.26  | 0.24  | 0.21  |
|         | p     | 0.0005   | ab    | a     | ab    |
| RLN     | Mean  | 135.2    | 132.0 | 159.9 | 167.9 |
|         | SD    | 49.3     | 69.5  | 81.9  | 89.9  |
|         | p     | 0.0005   | ab    | a     | b     |
| RLNN    | Mean  | 0.21     | 0.21  | 0.21  | 0.23  |
|         | SD    | 0.04     | 0.03  | 0.03  | 0.07  |
|         | p     | 0.5471   | a     | a     | a     |
| RP      | Mean  | 0.32     | 0.33  | 0.33  | 0.35  |
|         | SD    | 0.05     | 0.05  | 0.04  | 0.09  |
|         | p     | 0.8334   | a     | a     | a     |
| RV      | Mean  | 12.1     | 14.0  | 12.8  | 11.2  |
|         | SD    | 6.8      | 7.0   | 8.7   | 7.3   |
|         | p     | 0.0029   | a     | b     | ab    |
| SRE     | Mean  | 0.42     | 0.43  | 0.43  | 0.45  |
|         | SD    | 0.05     | 0.05  | 0.04  | 0.09  |
|         | p     | 0.4045   | a     | a     | a     |
| SRHGLE  | Mean  | 5.87     | 6.32  | 6.57  | 9.05  |
|         | SD    | 2.07     | 2.12  | 2.17  | 4.82  |
|         | p     | < 0.0001 | a     | a     | ab    |
| SRLGLE  | Mean  | 0.06     | 0.06  | 0.06  | 0.05  |
|         | SD    | 0.02     | 0.02  | 0.02  | 0.02  |
|         | p     | 0.0047   | a     | a     | ab    |

GLN - gray level non-uniformity; GLNN - gray level non-uniformity normalized; GLV - gray level variance; HGLRE - high gray level run emphasis; LRE - long run emphasis; LRHGLE - long run high gray level emphasis; LRLGLE - long run low gray level emphasis; LGLRE - low gray level run emphasis; RE - run entropy; RLN - run length non-uniformity; RLNN - run length non-uniformity normalized; RP - run percentage; RV - run variance; SRE - short run emphasis; SRHGLE - short run high gray level emphasis; SRLGLE - short run low gray level emphasis. Lower case letters (a-c) indicate differences between classes for  $p < 0.05$  independently for each feature.



**Table S43.** The values (mean  $\pm$ SD) of features of *Gray Level Run Length Matrix (GLRLM)* of output images, filtrated by *LaplacianSharpening* filter, compared between four classes (0-3) of the Equine Odontoclastic Tooth Resorption and Hypercementosis (EOTRH) syndrome. When features differed significantly ( $p < 0.05$ ).

| Feature |   | EOTRH    | 0     | 1     | 2     | 3     |
|---------|---|----------|-------|-------|-------|-------|
| GLN     |   | Mean     | 270.1 | 258.4 | 302.6 | 261.4 |
|         |   | SD       | 120.8 | 150.8 | 183.3 | 119.2 |
|         | p | 0.002    | a     | b     | a     | ab    |
| GLNN    |   | Mean     | 0.21  | 0.21  | 0.20  | 0.19  |
|         |   | SD       | 0.03  | 0.03  | 0.03  | 0.04  |
|         | p | < 0.0001 | a     | a     | bc    | c     |
| GLV     |   | Mean     | 1.91  | 1.91  | 2.06  | 2.76  |
|         |   | SD       | 0.51  | 0.49  | 0.52  | 1.40  |
|         | p | < 0.0001 | a     | a     | ab    | b     |
| HGLRE   |   | Mean     | 33.2  | 37.1  | 39.0  | 47.9  |
|         |   | SD       | 9.1   | 11.6  | 11.5  | 13.8  |
|         | p | < 0.0001 | a     | b     | b     | c     |
| LRE     |   | Mean     | 3.38  | 3.29  | 3.32  | 3.08  |
|         |   | SD       | 0.67  | 0.63  | 0.87  | 0.89  |
|         | p | 0.0769   | a     | a     | a     | a     |
| LRHGLE  |   | Mean     | 111.1 | 123.8 | 131.0 | 145.9 |
|         |   | SD       | 34.8  | 44.1  | 41.8  | 43.3  |
|         | p | < 0.0001 | a     | ab    | bc    | c     |
| LRLGLE  |   | Mean     | 0.14  | 0.12  | 0.12  | 0.10  |
|         |   | SD       | 0.06  | 0.06  | 0.07  | 0.06  |
|         | p | < 0.0001 | a     | b     | b     | c     |
| LGLRE   |   | Mean     | 0.05  | 0.04  | 0.04  | 0.04  |
|         |   | SD       | 0.02  | 0.02  | 0.02  | 0.01  |
|         | p | < 0.0001 | a     | ab    | bc    | c     |
| RE      |   | Mean     | 3.81  | 3.76  | 3.81  | 3.87  |
|         |   | SD       | 0.13  | 0.14  | 0.13  | 0.14  |
|         | p | < 0.0001 | a     | b     | ac    | c     |
| RLN     |   | Mean     | 669.8 | 657.7 | 807.1 | 770.9 |
|         |   | SD       | 263.5 | 396.2 | 490.6 | 287.7 |
|         | p | < 0.0001 | ab    | a     | b     | b     |
| RLNN    |   | Mean     | 0.52  | 0.53  | 0.53  | 0.56  |
|         |   | SD       | 0.04  | 0.04  | 0.05  | 0.07  |
|         | p | 0.013    | a     | ab    | ab    | b     |
| RP      |   | Mean     | 0.66  | 0.67  | 0.67  | 0.69  |
|         |   | SD       | 0.04  | 0.04  | 0.05  | 0.07  |
|         | p | 0.0541   | a     | a     | a     | a     |
| RV      |   | Mean     | 1.03  | 0.99  | 1.02  | 0.91  |
|         |   | SD       | 0.34  | 0.33  | 0.49  | 0.46  |
|         | p | 0.1383   | a     | a     | a     | a     |
| SRE     |   | Mean     | 0.75  | 0.75  | 0.75  | 0.77  |
|         |   | SD       | 0.03  | 0.03  | 0.03  | 0.05  |
|         | p | 0.0095   | a     | ab    | ab    | b     |
| SRHGLE  |   | Mean     | 24.8  | 27.8  | 29.3  | 37.0  |
|         |   | SD       | 7.1   | 9.0   | 9.1   | 11.9  |
|         | p | < 0.0001 | a     | b     | b     | c     |
| SRLGLE  |   | Mean     | 0.04  | 0.03  | 0.03  | 0.03  |
|         |   | SD       | 0.01  | 0.01  | 0.01  | 0.01  |
|         | p | 0.0003   | a     | ab    | bc    | a     |

GLN - gray level non-uniformity; GLNN - gray level non-uniformity normalized; GLV - gray level variance; HGLRE - high gray level run emphasis; LRE - long run emphasis; LRHGLE - long run high gray level emphasis; LRLGLE - long run low gray level emphasis; LGLRE - low gray level run emphasis; RE - run entropy; RLN - run length non-uniformity; RLNN - run length non-uniformity normalized; RP - run percentage; RV - run variance; SRE - short run emphasis; SRHGLE - short run high gray level emphasis; SRLGLE - short run low gray level emphasis. Lower case letters (a-c) indicate differences between classes for  $p < 0.05$  independently for each feature.



**Table S44.** The values (mean  $\pm$ SD) of features of *Gray Level Run Length Matrix (GLRLM)* of output images, filtrated by *DiscreteGaussian* filter, compared between four classes (0-3) of the Equine Odontoclastic Tooth Resorption and Hypercementosis (EOTRH) syndrome. When features differed significantly ( $p < 0.05$ ).

| Feature | EOTRH | 0        | 1     | 2     | 3     |
|---------|-------|----------|-------|-------|-------|
| GLN     | Mean  | 141.8    | 130.7 | 151.0 | 133.0 |
|         | SD    | 48.0     | 63.4  | 76.2  | 48.8  |
|         | p     | 0.0019   | a     | b     | ab    |
| GLNN    | Mean  | 0.30     | 0.28  | 0.28  | 0.26  |
|         | SD    | 0.04     | 0.03  | 0.04  | 0.04  |
|         | p     | < 0.0001 | a     | b     | c     |
| GLV     | Mean  | 0.89     | 1.02  | 1.05  | 1.29  |
|         | SD    | 0.23     | 0.26  | 0.29  | 0.46  |
|         | p     | < 0.0001 | a     | b     | c     |
| HGLRE   | Mean  | 11.4     | 12.8  | 13.4  | 16.7  |
|         | SD    | 3.5      | 3.5   | 3.9   | 5.7   |
|         | p     | < 0.0001 | a     | b     | c     |
| LRE     | Mean  | 47.3     | 54.8  | 50.3  | 42.9  |
|         | SD    | 20.6     | 27.0  | 23.7  | 25.3  |
|         | p     | 0.0063   | ab    | a     | b     |
| LRHGLE  | Mean  | 521.5    | 791.3 | 763.5 | 775.5 |
|         | SD    | 265.5    | 512.9 | 433.0 | 449.9 |
|         | p     | < 0.0001 | a     | b     | b     |
| LRLGLE  | Mean  | 6.27     | 5.24  | 4.85  | 3.50  |
|         | SD    | 3.56     | 3.05  | 3.06  | 2.55  |
|         | p     | < 0.0001 | a     | ab    | b     |
| LGLRE   | Mean  | 0.16     | 0.14  | 0.14  | 0.11  |
|         | SD    | 0.07     | 0.05  | 0.05  | 0.05  |
|         | p     | < 0.0001 | a     | ab    | bc    |
| RE      | Mean  | 4.91     | 4.78  | 4.93  | 4.99  |
|         | SD    | 0.26     | 0.31  | 0.30  | 0.24  |
|         | p     | < 0.0001 | a     | b     | a     |
| RLN     | Mean  | 76.0     | 82.7  | 89.6  | 95.8  |
|         | SD    | 29.8     | 39.4  | 42.0  | 50.1  |
|         | p     | 0.0574   | a     | a     | a     |
| RLNN    | Mean  | 0.15     | 0.17  | 0.16  | 0.17  |
|         | SD    | 0.03     | 0.03  | 0.03  | 0.05  |
|         | p     | < 0.0001 | a     | b     | a     |
| RP      | Mean  | 0.25     | 0.26  | 0.26  | 0.27  |
|         | SD    | 0.04     | 0.04  | 0.04  | 0.07  |
|         | p     | 0.0368   | a     | b     | ab    |
| RV      | Mean  | 22.9     | 28.7  | 24.2  | 20.4  |
|         | SD    | 13.2     | 18.1  | 15.1  | 14.2  |
|         | p     | 0.0003   | a     | b     | ab    |
| SRE     | Mean  | 0.30     | 0.33  | 0.31  | 0.33  |
|         | SD    | 0.05     | 0.05  | 0.05  | 0.08  |
|         | p     | < 0.0001 | a     | b     | a     |
| SRHGLE  | Mean  | 3.30     | 3.66  | 3.72  | 5.22  |
|         | SD    | 1.24     | 1.33  | 1.33  | 3.14  |
|         | p     | 0.0002   | a     | b     | ab    |
| SRLGLE  | Mean  | 0.06     | 0.06  | 0.05  | 0.05  |
|         | SD    | 0.03     | 0.03  | 0.02  | 0.02  |
|         | p     | < 0.0001 | ab    | a     | b     |

GLN - gray level non-uniformity; GLNN - gray level non-uniformity normalized; GLV - gray level variance; HGLRE - high gray level run emphasis; LRE - long run emphasis; LRHGLE - long run high gray level emphasis; LRLGLE - long run low gray level emphasis; LGLRE - low gray level run emphasis; RE - run entropy; RLN - run length non-uniformity; RLNN - run length non-uniformity normalized; RP - run percentage; RV - run variance; SRE - short run emphasis; SRHGLE - short run high gray level emphasis; SRLGLE - short run low gray level emphasis. Lower case letters (a-c) indicate differences between classes for  $p < 0.05$  independently for each feature.



**Table S45.** The values (mean  $\pm$ SD) of features of *Gray Level Run Length Matrix (GLRLM)* of output images, filtrated by *SmoothingRecursiveGaussian* filter, compared between four classes (0-3) of the Equine Odontoclastic Tooth Resorption and Hypercementosis (EOTRH) syndrome. When features differed significantly ( $p < 0.05$ ).

| Feature | EOTRH | 0        | 1     | 2     | 3     |
|---------|-------|----------|-------|-------|-------|
| GLN     | Mean  | 139.3    | 128.7 | 147.8 | 130.5 |
|         | SD    | 47.3     | 62.0  | 73.9  | 47.9  |
|         | p     | 0.0028   | a     | b     | ab    |
| GLNN    | Mean  | 0.30     | 0.28  | 0.28  | 0.26  |
|         | SD    | 0.04     | 0.03  | 0.04  | 0.04  |
|         | p     | < 0.0001 | a     | b     | c     |
| GLV     | Mean  | 0.89     | 1.02  | 1.04  | 1.29  |
|         | SD    | 0.23     | 0.26  | 0.28  | 0.45  |
|         | p     | < 0.0001 | a     | b     | c     |
| HGLRE   | Mean  | 11.2     | 12.7  | 13.3  | 16.6  |
|         | SD    | 3.7      | 3.4   | 4.0   | 5.8   |
|         | p     | < 0.0001 | a     | b     | c     |
| LRE     | Mean  | 49.7     | 57.7  | 53.4  | 44.9  |
|         | SD    | 21.3     | 28.7  | 25.2  | 26.1  |
|         | p     | 0.0082   | ab    | a     | ab    |
| LRHGLE  | Mean  | 543.8    | 821.8 | 809.7 | 810.4 |
|         | SD    | 296.3    | 516.4 | 478.7 | 478.3 |
|         | p     | < 0.0001 | a     | b     | b     |
| LRLGLE  | Mean  | 6.81     | 5.59  | 5.33  | 3.67  |
|         | SD    | 3.88     | 3.42  | 3.47  | 2.61  |
|         | p     | < 0.0001 | a     | b     | bc    |
| LGLRE   | Mean  | 0.17     | 0.15  | 0.14  | 0.12  |
|         | SD    | 0.07     | 0.06  | 0.06  | 0.05  |
|         | p     | < 0.0001 | a     | ab    | bc    |
| RE      | Mean  | 4.92     | 4.79  | 4.94  | 5.00  |
|         | SD    | 0.27     | 0.32  | 0.31  | 0.25  |
|         | p     | < 0.0001 | a     | b     | a     |
| RLN     | Mean  | 73.2     | 80.9  | 85.8  | 92.1  |
|         | SD    | 29.2     | 38.1  | 39.1  | 47.9  |
|         | p     | 0.0514   | a     | a     | A     |
| RLNN    | Mean  | 0.15     | 0.17  | 0.15  | 0.16  |
|         | SD    | 0.03     | 0.03  | 0.03  | 0.05  |
|         | p     | < 0.0001 | a     | b     | bc    |
| RP      | Mean  | 0.24     | 0.26  | 0.25  | 0.27  |
|         | SD    | 0.04     | 0.04  | 0.04  | 0.07  |
|         | p     | 0.0126   | a     | b     | ab    |
| RV      | Mean  | 23.9     | 30.0  | 25.5  | 21.1  |
|         | SD    | 13.7     | 18.9  | 16.1  | 14.5  |
|         | p     | 0.0004   | a     | b     | ab    |
| SRE     | Mean  | 0.29     | 0.32  | 0.30  | 0.32  |
|         | SD    | 0.05     | 0.05  | 0.05  | 0.08  |
|         | p     | < 0.0001 | a     | a     | b     |
| SRHGLE  | Mean  | 3.13     | 3.47  | 3.49  | 4.97  |
|         | SD    | 1.26     | 1.13  | 1.32  | 3.14  |
|         | p     | 0.001    | a     | b     | ab    |
| SRLGLE  | Mean  | 0.06     | 0.06  | 0.06  | 0.05  |
|         | SD    | 0.03     | 0.03  | 0.02  | 0.02  |
|         | p     | < 0.0001 | a     | b     | a     |

GLN - gray level non-uniformity; GLNN - gray level non-uniformity normalized; GLV - gray level variance; HGLRE - high gray level run emphasis; LRE - long run emphasis; LRHGLE - long run high gray level emphasis; LRLGLE - long run low gray level emphasis; LGLRE - low gray level run emphasis; RE - run entropy; RLN - run length non-uniformity; RLNN - run length non-uniformity normalized; RP - run percentage; RV - run variance; SRE - short run emphasis; SRHGLE - short run high gray level emphasis; SRLGLE - short run low gray level emphasis. Lower case letters (a-c) indicate differences between classes for  $p < 0.05$  independently for each feature.



**Table S46.** The values (mean  $\pm$ SD) of features of *Gray Level Size Zone Matrix (GLSZM)* of output images, filtrated by *Mean* filter, compared between four classes (0-3) of the Equine Odontoclastic Tooth Resorption and Hypercementosis (EOTRH) syndrome. When features differed significantly ( $p < 0.05$ ).

| Feature | EOTRH      | 0      | 1      | 2      | 3      |
|---------|------------|--------|--------|--------|--------|
| GLN     | Mean       | 8.76   | 7.49   | 8.20   | 7.49   |
|         | SD         | 9.40   | 2.76   | 3.16   | 2.72   |
| GLNN    | p 0.1896   | a      | a      | a      | a      |
|         | Mean       | 0.25   | 0.25   | 0.24   | 0.22   |
| GLV     | SD         | 0.05   | 0.05   | 0.04   | 0.05   |
|         | p 0.0001   | a      | a      | a      | b      |
| HGLZE   | Mean       | 1.60   | 1.84   | 1.83   | 2.22   |
|         | SD         | 0.46   | 0.50   | 0.51   | 0.72   |
| LAE     | p < 0.0001 | a      | b      | b      | c      |
|         | Mean       | 11.7   | 11.7   | 12.3   | 15.3   |
| LAHGLE  | SD         | 4.9    | 3.9    | 4.0    | 5.9    |
|         | p < 0.0001 | a      | a      | a      | b      |
| LALGLE  | Mean       | 52245  | 33076  | 38086  | 32819  |
|         | SD         | 179232 | 30322  | 35189  | 28353  |
| LGLZE   | p 0.1156   | a      | a      | a      | a      |
|         | Mean       | 479010 | 502080 | 598102 | 580243 |
| SZN     | SD         | 908904 | 573944 | 655116 | 490186 |
|         | p 0.005    | a      | ab     | b      | ab     |
| SZNN    | Mean       | 18935  | 2699   | 3045   | 2281   |
|         | SD         | 153844 | 2403   | 2976   | 2354   |
| SAE     | p < 0.0001 | a      | b      | b      | b      |
|         | Mean       | 0.23   | 0.24   | 0.22   | 0.19   |
| SAHGLE  | SD         | 0.10   | 0.10   | 0.09   | 0.08   |
|         | p 0.0031   | ab     | a      | ab     | b      |
| SALGLE  | Mean       | 3.95   | 3.27   | 3.69   | 3.43   |
|         | SD         | 4.04   | 1.52   | 1.74   | 1.63   |
| ZE      | p 0.1142   | a      | a      | a      | a      |
|         | Mean       | 0.12   | 0.11   | 0.11   | 0.10   |
| ZP      | SD         | 0.05   | 0.04   | 0.03   | 0.03   |
|         | p 0.1671   | a      | a      | a      | a      |
| ZV      | Mean       | 0.27   | 0.26   | 0.26   | 0.25   |
|         | SD         | 0.10   | 0.09   | 0.08   | 0.08   |
| GLN     | p 0.6134   | a      | a      | a      | a      |
|         | Mean       | 2.77   | 2.41   | 2.82   | 3.30   |
| GLNN    | SD         | 1.80   | 1.37   | 1.60   | 1.76   |
|         | p 0.0009   | ab     | a      | ab     | b      |
| GLV     | Mean       | 0.074  | 0.082  | 0.071  | 0.060  |
|         | SD         | 0.053  | 0.054  | 0.045  | 0.042  |
| HGLZE   | p 0.0059   | ab     | a      | ab     | b      |
|         | Mean       | 4.42   | 4.39   | 4.50   | 4.61   |
| LAE     | SD         | 0.54   | 0.48   | 0.46   | 0.51   |
|         | p 0.007    | ab     | a      | ab     | b      |
| LAHGLE  | Mean       | 0.017  | 0.018  | 0.017  | 0.019  |
|         | SD         | 0.005  | 0.005  | 0.006  | 0.008  |
| LALGLE  | p 0.0652   | a      | a      | a      | a      |
|         | Mean       | 47561  | 29110  | 33505  | 28232  |
| LGLZE   | SD         | 177065 | 27925  | 32482  | 25265  |
|         | p 0.1364   | a      | a      | a      | a      |

GLN - gray level non-uniformity; GLNN - gray level non-uniformity normalized; GLV - gray level variance; HGLZE - high gray level zone emphasis; LAE - large area emphasis; LAHGLE - large area high gray level emphasis; LALGLE - large area low gray level emphasis; LGLZE - low gray level zone emphasis; SZN - size-zone non-uniformity; SZNN - size-zone non-uniformity normalized; SAE - small area emphasis; SAHGLE - small area high gray level emphasis; SALGLE - small area low gray level emphasis; ZE - zone entropy; ZP - zone percentage; ZV - zone variance. Lower case letters (a-c) indicate differences between classes for  $p < 0.05$  independently for each feature.



**Table S47.** The values (mean  $\pm$ SD) of features of *Gray Level Size Zone Matrix (GLSZM)* of output images, filtrated by *Median* filter, compared between four classes (0-3) of the Equine Odontoclastic Tooth Resorption and Hypercementosis (EOTRH) syndrome. When features differed significantly ( $p < 0.05$ ).

| Feature | EOTRH | 0        | 1      | 2      | 3      |
|---------|-------|----------|--------|--------|--------|
| GLN     | Mean  | 9.66     | 8.63   | 9.51   | 9.23   |
|         | SD    | 3.64     | 3.62   | 4.07   | 3.59   |
|         | p     | 0.0698   | a      | a      | a      |
| GLNN    | Mean  | 0.25     | 0.24   | 0.23   | 0.22   |
|         | SD    | 0.05     | 0.04   | 0.04   | 0.04   |
|         | p     | < 0.0001 | a      | ab     | b      |
| GLV     | Mean  | 1.54     | 1.74   | 1.78   | 2.04   |
|         | SD    | 0.42     | 0.44   | 0.42   | 0.55   |
|         | p     | < 0.0001 | a      | b      | c      |
| HGLZE   | Mean  | 12.0     | 12.4   | 12.8   | 16.0   |
|         | SD    | 3.8      | 3.9    | 4.1    | 6.2    |
|         | p     | 0.0003   | a      | a      | b      |
| LAE     | Mean  | 27554    | 25821  | 28001  | 25822  |
|         | SD    | 25022    | 24180  | 25779  | 25935  |
|         | p     | 0.3797   |        |        |        |
| LAHGLE  | Mean  | 316958   | 402733 | 453463 | 471845 |
|         | SD    | 317481   | 449651 | 514848 | 526983 |
|         | p     | 0.0221   | a      | ab     | b      |
| LALGLE  | Mean  | 3063     | 2043   | 2224   | 1768   |
|         | SD    | 2874     | 1937   | 2232   | 1895   |
|         | p     | < 0.0001 | a      | b      | ab     |
| LGLZE   | Mean  | 0.21     | 0.21   | 0.20   | 0.17   |
|         | SD    | 0.08     | 0.08   | 0.08   | 0.07   |
|         | p     | 0.0313   | ab     | a      | ab     |
| SZN     | Mean  | 4.04     | 3.42   | 3.98   | 3.82   |
|         | SD    | 2.51     | 1.74   | 2.31   | 2.15   |
|         | p     | 0.0753   | a      | a      | a      |
| SZNN    | Mean  | 0.10     | 0.10   | 0.10   | 0.09   |
|         | SD    | 0.04     | 0.03   | 0.03   | 0.03   |
|         | p     | 0.1083   | a      | a      | a      |
| SAE     | Mean  | 0.25     | 0.22   | 0.23   | 0.23   |
|         | SD    | 0.09     | 0.09   | 0.08   | 0.08   |
|         | p     | 0.0903   | a      | a      | a      |
| SAHGLE  | Mean  | 2.59     | 2.16   | 2.50   | 3.23   |
|         | SD    | 1.39     | 1.24   | 1.43   | 2.01   |
|         | p     | 0.0002   | ab     | a      | ab     |
| SALGLE  | Mean  | 0.06     | 0.06   | 0.06   | 0.05   |
|         | SD    | 0.03     | 0.04   | 0.03   | 0.03   |
|         | p     | 0.1269   |        |        |        |
| ZE      | Mean  | 4.62     | 4.63   | 4.72   | 4.87   |
|         | SD    | 0.41     | 0.49   | 0.52   | 0.57   |
|         | p     | 0.011    | a      | a      | ab     |
| ZP      | Mean  | 0.02     | 0.02   | 0.02   | 0.02   |
|         | SD    | 0.01     | 0.01   | 0.01   | 0.01   |
|         | p     | 0.3702   | a      | a      | a      |
| ZV      | Mean  | 24240    | 22904  | 24766  | 22471  |
|         | SD    | 22759    | 22526  | 24008  | 23263  |
|         | p     | 0.4082   | a      | a      | a      |

GLN - gray level non-uniformity; GLNN - gray level non-uniformity normalized; GLV - gray level variance; HGLZE - high gray level zone emphasis; LAE - large area emphasis; LAHGLE - large area high gray level emphasis; LALGLE - large area low gray level emphasis; LGLZE - low gray level zone emphasis; SZN - size-zone non-uniformity; SZNN - size-zone non-uniformity normalized; SAE - small area emphasis; SAHGLE - small area high gray level emphasis; SALGLE - small area low gray level emphasis; ZE - zone entropy; ZP - zone percentage; ZV - zone variance. Lower case letters (a-c) indicate differences between classes for  $p < 0.05$  independently for each feature.



**Table S48.** The values (mean  $\pm$ SD) of features of *Gray Level Size Zone Matrix (GLSZM)* of output images, filtrated by *Normalize* filter, compared between four classes (0-3) of the Equine Odontoclastic Tooth Resorption and Hypercementosis (EOTRH) syndrome. When features differed significantly ( $p < 0.05$ ).

| Feature | EOTRH | 0        | 1       | 2        | 3       |
|---------|-------|----------|---------|----------|---------|
| GLN     | Mean  | 2.74     | 1.51    | 1.94     | 3.48    |
|         | SD    | 17.35    | 1.94    | 2.48     | 4.73    |
|         | p     | < 0.0001 | a       | ab       | b       |
| GLNN    | Mean  | 0.96     | 0.90    | 0.86     | 0.80    |
|         | SD    | 0.13     | 0.18    | 0.20     | 0.20    |
|         | p     | < 0.0001 | a       | b        | bc      |
| GLV     | Mean  | 0.02     | 0.05    | 0.07     | 0.10    |
|         | SD    | 0.07     | 0.09    | 0.10     | 0.10    |
|         | p     | < 0.0001 | a       | b        | bc      |
| HGLZE   | Mean  | 1.11     | 1.25    | 1.37     | 1.47    |
|         | SD    | 0.35     | 0.49    | 0.57     | 0.56    |
|         | p     | < 0.0001 | a       | b        | bc      |
| LAE     | Mean  | 4576000  | 3432000 | 4192000  | 2465000 |
|         | SD    | 5772000  | 5734000 | 6413000  | 2430000 |
|         | p     | < 0.0001 | a       | b        | b       |
| LAHGLE  | Mean  | 5282000  | 5498000 | 7736000  | 4946000 |
|         | SD    | 6764000  | 9852000 | 12330000 | 5658000 |
|         | p     | 0.0001   | a       | b        | a       |
| LALGLE  | Mean  | 4400000  | 2916000 | 3306000  | 1845000 |
|         | SD    | 5760000  | 5568000 | 6182000  | 2413000 |
|         | p     | < 0.0001 | a       | bc       | b       |
| LGLZE   | Mean  | 0.97     | 0.94    | 0.91     | 0.88    |
|         | SD    | 0.09     | 0.12    | 0.14     | 0.14    |
|         | p     | < 0.0001 | a       | b        | bc      |
| SZN     | Mean  | 1.77     | 1.16    | 1.18     | 1.43    |
|         | SD    | 7.70     | 0.50    | 0.57     | 0.93    |
|         | p     | < 0.0001 | a       | ab       | bc      |
| SZNN    | Mean  | 0.95     | 0.86    | 0.77     | 0.60    |
|         | SD    | 0.17     | 0.26    | 0.31     | 0.35    |
|         | p     | < 0.0001 | a       | ab       | b       |
| SAE     | Mean  | 0.04     | 0.10    | 0.15     | 0.17    |
|         | SD    | 0.14     | 0.20    | 0.22     | 0.19    |
|         | p     | < 0.0001 | a       | b        | b       |
| SAHGLE  | Mean  | 0.05     | 0.11    | 0.15     | 0.17    |
|         | SD    | 0.16     | 0.23    | 0.22     | 0.20    |
|         | p     | < 0.0001 | a       | b        | b       |
| SALGLE  | Mean  | 0.04     | 0.10    | 0.15     | 0.17    |
|         | SD    | 0.14     | 0.20    | 0.22     | 0.19    |
|         | p     | < 0.0001 | a       | b        | b       |
| ZE      | Mean  | 0.14     | 0.35    | 0.58     | 1.09    |
|         | SD    | 0.48     | 0.70    | 0.85     | 1.06    |
|         | p     | < 0.0001 | a       | ab       | b       |
| ZP      | Mean  | 0.0007   | 0.0011  | 0.0012   | 0.0024  |
|         | SD    | 0.0004   | 0.0011  | 0.0013   | 0.0028  |
|         | p     | < 0.0001 | a       | b        | b       |
| ZV      | Mean  | 229110   | 427940  | 711449   | 526361  |
|         | SD    | 1429000  | 1334000 | 1654000  | 952263  |
|         | p     | < 0.0001 | a       | b        | bc      |

GLN - gray level non-uniformity; GLNN - gray level non-uniformity normalized; GLV - gray level variance; HGLZE - high gray level zone emphasis; LAE - large area emphasis; LAHGLE - large area high gray level emphasis; LALGLE - large area low gray level emphasis; LGLZE - low gray level zone emphasis; SZN - size-zone non-uniformity; SZNN - size-zone non-uniformity normalized; SAE - small area emphasis; SAHGLE - small area high gray level emphasis; SALGLE - small area low gray level emphasis; ZE - zone entropy; ZP - zone percentage; ZV - zone variance. Lower case letters (a-c) indicate differences between classes for  $p < 0.05$  independently for each feature.



**Table S49.** The values (mean  $\pm$ SD) of features of *Gray Level Size Zone Matrix (GLSZM)* of output images, filtrated by *Bilateral* filter, compared between four classes (0-3) of the Equine Odontoclastic Tooth Resorption and Hypercementosis (EOTRH) syndrome. When features differed significantly ( $p < 0.05$ ).

| Feature | EOTRH | 0        | 1       | 2       | 3       |
|---------|-------|----------|---------|---------|---------|
| GLN     | Mean  | 5.62     | 5.83    | 6.26    | 5.95    |
|         | SD    | 2.29     | 2.50    | 2.42    | 2.69    |
| GLNN    | p     | 0.1466   | a       | a       | a       |
|         | Mean  | 0.36     | 0.34    | 0.32    | 0.28    |
| GLV     | SD    | 0.09     | 0.09    | 0.08    | 0.06    |
|         | p     | < 0.0001 | a       | ab      | b       |
| HGLZE   | Mean  | 0.91     | 1.10    | 1.14    | 1.39    |
|         | SD    | 0.36     | 0.42    | 0.43    | 0.46    |
| LAE     | p     | < 0.0001 | a       | b       | c       |
|         | Mean  | 6.32     | 6.96    | 7.69    | 9.89    |
| LAHGLE  | SD    | 2.54     | 2.61    | 3.00    | 3.63    |
|         | p     | < 0.0001 | a       | ab      | b       |
| LALGLE  | Mean  | 116181   | 93684   | 106074  | 81256   |
|         | SD    | 104594   | 107367  | 121791  | 80949   |
| LGLZE   | p     | < 0.0001 | a       | b       | c       |
|         | Mean  | 837755   | 1058000 | 1194000 | 1117000 |
| SZN     | SD    | 990116   | 1524000 | 1579000 | 1080000 |
|         | p     | 0.1242   | a       | a       | a       |
| SZNN    | Mean  | 21305    | 11032   | 12631   | 7331    |
|         | SD    | 18670    | 12589   | 16935   | 8063    |
| SAE     | p     | < 0.0001 | a       | b       | b       |
|         | Mean  | 0.40     | 0.37    | 0.33    | 0.27    |
| SAHGLE  | SD    | 0.17     | 0.16    | 0.15    | 0.12    |
|         | p     | < 0.0001 | a       | ab      | b       |
| SALGLE  | Mean  | 2.57     | 2.80    | 3.09    | 3.11    |
|         | SD    | 1.68     | 1.67    | 1.73    | 2.10    |
| ZE      | p     | 0.0913   | a       | a       | a       |
|         | Mean  | 0.16     | 0.16    | 0.15    | 0.13    |
| ZP      | SD    | 0.06     | 0.06    | 0.05    | 0.04    |
|         | p     | 0.0188   | a       | a       | ab      |
| ZV      | Mean  | 0.31     | 0.32    | 0.32    | 0.28    |
|         | SD    | 0.11     | 0.12    | 0.12    | 0.10    |
| GLN     | p     | 0.1944   | a       | a       | a       |
|         | Mean  | 1.60     | 1.64    | 2.02    | 2.49    |
| GLNN    | SD    | 1.05     | 1.15    | 1.41    | 1.73    |
|         | p     | 0.0015   | a       | a       | ab      |
| GLV     | Mean  | 0.15     | 0.15    | 0.12    | 0.09    |
|         | SD    | 0.10     | 0.09    | 0.08    | 0.05    |
| HGLZE   | p     | < 0.0001 | a       | a       | a       |
|         | Mean  | 3.43     | 3.54    | 3.72    | 3.92    |
| LAE     | SD    | 0.45     | 0.45    | 0.40    | 0.51    |
|         | p     | < 0.0001 | a       | a       | b       |
| LAHGLE  | Mean  | 0.0087   | 0.0110  | 0.0106  | 0.0124  |
|         | SD    | 0.0037   | 0.0051  | 0.0047  | 0.0074  |
| LALGLE  | p     | 0.0002   | a       | b       | b       |
|         | Mean  | 95224    | 77059   | 88168   | 66717   |
| LGLZE   | SD    | 88547    | 90035   | 101806  | 68499   |
|         | p     | 0.0001   | a       | ab      | b       |

GLN - gray level non-uniformity; GLNN - gray level non-uniformity normalized; GLV - gray level variance; HGLZE - high gray level zone emphasis; LAE - large area emphasis; LAHGLE - large area high gray level emphasis; LALGLE - large area low gray level emphasis; LGLZE - low gray level zone emphasis; SZN - size-zone non-uniformity; SZNN - size-zone non-uniformity normalized; SAE - small area emphasis; SAHGLE - small area high gray level emphasis; SALGLE - small area low gray level emphasis; ZE - zone entropy; ZP - zone percentage; ZV - zone variance. Lower case letters (a-c) indicate differences between classes for  $p < 0.05$  independently for each feature.



**Table S50.** The values (mean  $\pm$ SD) of features of *Gray Level Size Zone Matrix (GLSZM)* of output images, filtrated by *Binomial* filter, compared between four classes (0-3) of the Equine Odontoclastic Tooth Resorption and Hypercementosis (EOTRH) syndrome. When features differed significantly ( $p < 0.05$ ).

| Feature | EOTRH | 0        | 1      | 2      | 3      |
|---------|-------|----------|--------|--------|--------|
| GLN     | Mean  | 8.83     | 8.02   | 9.05   | 8.51   |
|         | SD    | 2.98     | 3.17   | 3.87   | 3.07   |
|         | p     | 0.0271   | ab     | b      | ab     |
| GLNN    | Mean  | 0.25     | 0.24   | 0.23   | 0.22   |
|         | SD    | 0.04     | 0.04   | 0.04   | 0.05   |
|         | p     | < 0.0001 | a      | bc     | c      |
| GLV     | Mean  | 1.61     | 1.87   | 1.88   | 2.18   |
|         | SD    | 0.44     | 0.49   | 0.49   | 0.65   |
|         | p     | < 0.0001 | a      | b      | c      |
| HGLZE   | Mean  | 11.7     | 12.4   | 12.7   | 15.8   |
|         | SD    | 3.8      | 3.8    | 4.0    | 6.0    |
|         | p     | < 0.0001 | a      | a      | b      |
| LAE     | Mean  | 30155    | 28107  | 31400  | 27974  |
|         | SD    | 24166    | 24427  | 27548  | 25315  |
|         | p     | 0.2651   | a      | a      | a      |
| LAHGLE  | Mean  | 344800   | 433552 | 498496 | 496306 |
|         | SD    | 317234   | 447143 | 509812 | 445154 |
|         | p     | 0.0204   | a      | b      | ab     |
| LALGLE  | Mean  | 3360     | 2224   | 2495   | 1908   |
|         | SD    | 2694     | 1980   | 2379   | 1966   |
|         | p     | < 0.0001 | a      | b      | b      |
| LGLZE   | Mean  | 0.23     | 0.22   | 0.21   | 0.18   |
|         | SD    | 0.10     | 0.08   | 0.09   | 0.07   |
|         | p     | 0.0092   | a      | ab     | b      |
| SZN     | Mean  | 4.04     | 3.59   | 4.31   | 4.05   |
|         | SD    | 1.82     | 1.54   | 2.43   | 1.89   |
|         | p     | 0.0656   | a      | a      | a      |
| SZNN    | Mean  | 0.11     | 0.11   | 0.11   | 0.10   |
|         | SD    | 0.04     | 0.03   | 0.03   | 0.03   |
|         | p     | 0.1034   | a      | a      | a      |
| SAE     | Mean  | 0.28     | 0.27   | 0.26   | 0.25   |
|         | SD    | 0.08     | 0.08   | 0.08   | 0.08   |
|         | p     | 0.3543   | a      | a      | a      |
| SAHGLE  | Mean  | 2.91     | 2.75   | 2.92   | 3.42   |
|         | SD    | 1.53     | 1.34   | 1.47   | 1.89   |
|         | p     | 0.1268   | a      | a      | a      |
| SALGLE  | Mean  | 0.07     | 0.08   | 0.07   | 0.06   |
|         | SD    | 0.05     | 0.05   | 0.04   | 0.04   |
|         | p     | 0.0259   | ab     | a      | b      |
| ZE      | Mean  | 4.53     | 4.51   | 4.64   | 4.76   |
|         | SD    | 0.42     | 0.48   | 0.48   | 0.55   |
|         | p     | 0.0024   | ab     | a      | b      |
| ZP      | Mean  | 0.0194   | 0.0202 | 0.0195 | 0.0195 |
|         | SD    | 0.0063   | 0.0057 | 0.0063 | 0.0063 |
|         | p     | 0.2283   | a      | a      | a      |
| ZV      | Mean  | 26648    | 24977  | 27888  | 24432  |
|         | SD    | 22420    | 22840  | 25783  | 22830  |
|         | p     | 0.2656   | a      | a      | a      |

GLN - gray level non-uniformity; GLNN - gray level non-uniformity normalized; GLV - gray level variance; HGLZE - high gray level zone emphasis; LAE - large area emphasis; LAHGLE - large area high gray level emphasis; LALGLE - large area low gray level emphasis; LGLZE - low gray level zone emphasis; SZN - size-zone non-uniformity; SZNN - size-zone non-uniformity normalized; SAE - small area emphasis; SAHGLE - small area high gray level emphasis; SALGLE - small area low gray level emphasis; ZE - zone entropy; ZP - zone percentage; ZV - zone variance. Lower case letters (a-c) indicate differences between classes for  $p < 0.05$  independently for each feature.



**Table S51.** The values (mean  $\pm$ SD) of features of *Gray Level Size Zone Matrix (GLSZM)* of output images, filtrated by *CurvatureFlow* filter, compared between four classes (0-3) of the Equine Odontoclastic Tooth Resorption and Hypercementosis (EOTRH) syndrome. When features differed significantly ( $p < 0.05$ ).

| Feature | EOTRH | 0        | 1      | 2      | 3      |
|---------|-------|----------|--------|--------|--------|
| GLN     | Mean  | 15.0     | 13.5   | 15.5   | 15.8   |
|         | SD    | 4.3      | 5.6    | 6.9    | 6.8    |
|         | p     | 0.002    | a      | b      | ab     |
| GLNN    | Mean  | 0.24     | 0.23   | 0.22   | 0.20   |
|         | SD    | 0.03     | 0.04   | 0.03   | 0.03   |
|         | p     | < 0.0001 | a      | a      | b      |
| GLV     | Mean  | 1.64     | 1.83   | 1.90   | 2.19   |
|         | SD    | 0.36     | 0.44   | 0.45   | 0.58   |
|         | p     | < 0.0001 | a      | b      | c      |
| HGLZE   | Mean  | 13.6     | 14.4   | 15.1   | 19.0   |
|         | SD    | 4.1      | 4.3    | 4.4    | 6.9    |
|         | p     | < 0.0001 | a      | a      | b      |
| LAE     | Mean  | 14354    | 14018  | 14372  | 12978  |
|         | SD    | 14574    | 13188  | 13972  | 12799  |
|         | p     | 0.6144   | a      | a      | a      |
| LAHGLE  | Mean  | 183960   | 234333 | 252992 | 251620 |
|         | SD    | 206880   | 254514 | 298139 | 266459 |
|         | p     | 0.021    | a      | b      | ab     |
| LALGLE  | Mean  | 1359     | 1013   | 1002   | 842    |
|         | SD    | 1293     | 941    | 914    | 972    |
|         | p     | 0.0007   | a      | b      | ab     |
| LGLZE   | Mean  | 0.18     | 0.18   | 0.17   | 0.14   |
|         | SD    | 0.08     | 0.07   | 0.07   | 0.07   |
|         | p     | 0.0005   | a      | a      | b      |
| SZN     | Mean  | 10.8     | 9.2    | 12.0   | 13.4   |
|         | SD    | 4.3      | 4.5    | 6.4    | 8.2    |
|         | p     | < 0.0001 | a      | b      | a      |
| SZNN    | Mean  | 0.17     | 0.16   | 0.16   | 0.16   |
|         | SD    | 0.05     | 0.04   | 0.04   | 0.05   |
|         | p     | 0.0614   | a      | a      | a      |
| SAE     | Mean  | 0.39     | 0.37   | 0.39   | 0.39   |
|         | SD    | 0.08     | 0.07   | 0.07   | 0.08   |
|         | p     | 0.0569   | a      | a      | a      |
| SAHGLE  | Mean  | 5.16     | 5.18   | 5.85   | 7.31   |
|         | SD    | 1.76     | 1.72   | 2.20   | 3.11   |
|         | p     | < 0.0001 | a      | a      | ab     |
| SALGLE  | Mean  | 0.08     | 0.07   | 0.07   | 0.06   |
|         | SD    | 0.05     | 0.04   | 0.03   | 0.03   |
|         | p     | 0.0076   | a      | a      | ab     |
| ZE      | Mean  | 4.78     | 4.77   | 4.89   | 5.01   |
|         | SD    | 0.34     | 0.45   | 0.41   | 0.50   |
|         | p     | 0.0027   | a      | a      | ab     |
| ZP      | Mean  | 0.0353   | 0.0351 | 0.0351 | 0.0440 |
|         | SD    | 0.0108   | 0.0103 | 0.0107 | 0.0247 |
|         | p     | 0.6555   | a      | a      | a      |
| ZV      | Mean  | 13258    | 12960  | 13310  | 11955  |
|         | SD    | 13771    | 12629  | 13419  | 12049  |
|         | p     | 0.6217   | a      | a      | a      |

GLN - gray level non-uniformity; GLNN - gray level non-uniformity normalized; GLV - gray level variance; HGLZE - high gray level zone emphasis; LAE - large area emphasis; LAHGLE - large area high gray level emphasis; LALGLE - large area low gray level emphasis; LGLZE - low gray level zone emphasis; SZN - size-zone non-uniformity; SZNN - size-zone non-uniformity normalized; SAE - small area emphasis; SAHGLE - small area high gray level emphasis; SALGLE - small area low gray level emphasis; ZE - zone entropy; ZP - zone percentage; ZV - zone variance. Lower case letters (a-c) indicate differences between classes for  $p < 0.05$  independently for each feature.



**Table S52.** The values (mean  $\pm$ SD) of features of *Gray Level Size Zone Matrix (GLSZM)* of output images, filtrated by *LaplacianSharpening* filter, compared between four classes (0-3) of the Equine Odontoclastic Tooth Resorption and Hypercementosis (EOTRH) syndrome. When features differed significantly ( $p < 0.05$ ).

| Feature | EOTRH | 0        | 1     | 2     | 3     |
|---------|-------|----------|-------|-------|-------|
| GLN     | Mean  | 65.6     | 64.5  | 77.0  | 71.2  |
|         | SD    | 23.4     | 33.5  | 43.8  | 25.8  |
|         | p     | 0.0016   | a     | a     | b     |
| GLNN    | Mean  | 0.17     | 0.17  | 0.16  | 0.15  |
|         | SD    | 0.02     | 0.02  | 0.02  | 0.02  |
|         | p     | < 0.0001 | a     | a     | ab    |
| GLV     | Mean  | 2.85     | 2.93  | 3.08  | 3.75  |
|         | SD    | 0.51     | 0.49  | 0.55  | 1.28  |
|         | p     | < 0.0001 | a     | ab    | bc    |
| HGLZE   | Mean  | 33.2     | 35.9  | 37.7  | 45.8  |
|         | SD    | 8.8      | 10.9  | 10.7  | 12.9  |
|         | p     | < 0.0001 | a     | ab    | bc    |
| LAE     | Mean  | 494.8    | 399.7 | 406.0 | 435.9 |
|         | SD    | 613.2    | 374.0 | 438.9 | 474.5 |
|         | p     | 0.7564   | a     | a     | a     |
| LAHGLE  | Mean  | 15283    | 15195 | 16204 | 18441 |
|         | SD    | 20751    | 17819 | 16483 | 16836 |
|         | p     | 0.2376   | a     | a     | a     |
| LALGLE  | Mean  | 18.8     | 12.7  | 12.3  | 12.7  |
|         | SD    | 23.7     | 12.6  | 16.4  | 18.5  |
|         | p     | 0.0038   | a     | ab    | ab    |
| LGLZE   | Mean  | 0.06     | 0.06  | 0.05  | 0.05  |
|         | SD    | 0.03     | 0.03  | 0.03  | 0.02  |
|         | p     | < 0.0001 | a     | ab    | ab    |
| SZN     | Mean  | 121.9    | 123.8 | 154.0 | 166.9 |
|         | SD    | 39.9     | 60.8  | 80.2  | 72.2  |
|         | p     | < 0.0001 | ab    | a     | bc    |
| SZNN    | Mean  | 0.31     | 0.33  | 0.33  | 0.34  |
|         | SD    | 0.03     | 0.04  | 0.03  | 0.04  |
|         | p     | < 0.0001 | a     | b     | b     |
| SAE     | Mean  | 0.58     | 0.59  | 0.59  | 0.60  |
|         | SD    | 0.03     | 0.04  | 0.03  | 0.04  |
|         | p     | < 0.0001 | a     | b     | ab    |
| SAHGLE  | Mean  | 19.1     | 21.0  | 22.2  | 27.6  |
|         | SD    | 5.1      | 6.3   | 6.2   | 7.9   |
|         | p     | < 0.0001 | a     | ab    | b     |
| SALGLE  | Mean  | 0.04     | 0.04  | 0.04  | 0.03  |
|         | SD    | 0.02     | 0.02  | 0.02  | 0.01  |
|         | p     | 0.0006   | a     | a     | ab    |
| ZE      | Mean  | 5.02     | 4.93  | 5.01  | 5.04  |
|         | SD    | 0.21     | 0.29  | 0.24  | 0.22  |
|         | p     | 0.0037   | a     | b     | ab    |
| ZP      | Mean  | 0.21     | 0.22  | 0.22  | 0.25  |
|         | SD    | 0.04     | 0.04  | 0.05  | 0.09  |
|         | p     | 0.0531   | a     | a     | a     |
| ZV      | Mean  | 468.2    | 375.7 | 381.9 | 414.5 |
|         | SD    | 602.7    | 366.3 | 429.9 | 463.8 |
|         | p     | 0.7837   | a     | a     | a     |

GLN - gray level non-uniformity; GLNN - gray level non-uniformity normalized; GLV - gray level variance; HGLZE - high gray level zone emphasis; LAE - large area emphasis; LAHGLE - large area high gray level emphasis; LALGLE - large area low gray level emphasis; LGLZE - low gray level zone emphasis; SZN - size-zone non-uniformity; SZNN - size-zone non-uniformity normalized; SAE - small area emphasis; SAHGLE - small area high gray level emphasis; SALGLE - small area low gray level emphasis; ZE - zone entropy; ZP - zone percentage; ZV - zone variance. Lower case letters (a-c) indicate differences between classes for  $p < 0.05$  independently for each feature.



**Table S53.** The values (mean  $\pm$ SD) of features of *Gray Level Size Zone Matrix (GLSZM)* of output images, filtrated by *DiscreteGaussian* filter, compared between four classes (0-3) of the Equine Odontoclastic Tooth Resorption and Hypercementosis (EOTRH) syndrome. When features differed significantly ( $p < 0.05$ ).

| Feature | EOTRH | 0        | 1      | 2      | 3      |
|---------|-------|----------|--------|--------|--------|
| GLN     | Mean  | 7.42     | 6.98   | 7.63   | 6.81   |
|         | SD    | 2.53     | 2.58   | 2.98   | 2.42   |
|         | p     | 0.1169   | a      | a      | a      |
| GLNN    | Mean  | 0.26     | 0.26   | 0.24   | 0.22   |
|         | SD    | 0.04     | 0.05   | 0.04   | 0.05   |
|         | p     | < 0.0001 | a      | a      | b      |
| GLV     | Mean  | 1.52     | 1.78   | 1.79   | 2.16   |
|         | SD    | 0.40     | 0.50   | 0.49   | 0.66   |
|         | p     | < 0.0001 | a      | b      | c      |
| HGLZE   | Mean  | 10.7     | 11.2   | 11.6   | 14.8   |
|         | SD    | 3.4      | 3.6    | 3.7    | 5.7    |
|         | p     | < 0.0001 | a      | a      | b      |
| LAE     | Mean  | 38710    | 37112  | 41960  | 36943  |
|         | SD    | 28315    | 33309  | 37802  | 32694  |
|         | p     | 0.1575   | a      | a      | a      |
| LAHGLE  | Mean  | 425904   | 547603 | 620720 | 644869 |
|         | SD    | 370465   | 615603 | 597496 | 578646 |
|         | p     | 0.0148   | a      | b      | a      |
| LALGLE  | Mean  | 4539     | 3129   | 3540   | 2666   |
|         | SD    | 3300     | 2791   | 3318   | 2732   |
|         | p     | < 0.0001 | a      | b      | b      |
| LGLZE   | Mean  | 0.25     | 0.26   | 0.24   | 0.21   |
|         | SD    | 0.11     | 0.11   | 0.10   | 0.10   |
|         | p     | 0.0036   | ab     | a      | ab     |
| SZN     | Mean  | 3.16     | 2.94   | 3.24   | 2.84   |
|         | SD    | 1.44     | 1.39   | 1.46   | 1.28   |
|         | p     | 0.1246   | a      | a      | a      |
| SZNN    | Mean  | 0.11     | 0.11   | 0.10   | 0.09   |
|         | SD    | 0.04     | 0.04   | 0.03   | 0.03   |
|         | p     | 0.0093   | a      | a      | ab     |
| SAE     | Mean  | 0.26     | 0.25   | 0.25   | 0.22   |
|         | SD    | 0.09     | 0.09   | 0.08   | 0.09   |
|         | p     | 0.0234   | a      | ab     | ab     |
| SAHGLE  | Mean  | 2.35     | 2.14   | 2.38   | 2.60   |
|         | SD    | 1.21     | 1.17   | 1.23   | 1.66   |
|         | p     | 0.2281   | a      | a      | a      |
| SALGLE  | Mean  | 0.08     | 0.09   | 0.08   | 0.06   |
|         | SD    | 0.06     | 0.06   | 0.05   | 0.05   |
|         | p     | 0.0001   | a      | a      | b      |
| ZE      | Mean  | 4.31     | 4.30   | 4.45   | 4.55   |
|         | SD    | 0.43     | 0.48   | 0.46   | 0.48   |
|         | p     | 0.0004   | a      | a      | ab     |
| ZP      | Mean  | 0.0156   | 0.0168 | 0.0158 | 0.0170 |
|         | SD    | 0.0045   | 0.0050 | 0.0051 | 0.0072 |
|         | p     | 0.121    | a      | a      | a      |
| ZV      | Mean  | 33410    | 32368  | 36660  | 31410  |
|         | SD    | 25750    | 30584  | 34989  | 29090  |
|         | p     | 0.1644   | a      | a      | a      |

GLN - gray level non-uniformity; GLNN - gray level non-uniformity normalized; GLV - gray level variance; HGLZE - high gray level zone emphasis; LAE - large area emphasis; LAHGLE - large area high gray level emphasis; LALGLE - large area low gray level emphasis; LGLZE - low gray level zone emphasis; SZN - size-zone non-uniformity; SZNN - size-zone non-uniformity normalized; SAE - small area emphasis; SAHGLE - small area high gray level emphasis; SALGLE - small area low gray level emphasis; ZE - zone entropy; ZP - zone percentage; ZV - zone variance. Lower case letters (a-c) indicate differences between classes for  $p < 0.05$  independently for each feature.



**Table S54.** The values (mean  $\pm$ SD) of features of *Gray Level Size Zone Matrix (GLSZM)* of output images, filtrated by *SmoothingRecursiveGaussian* filter, compared between four classes (0-3) of the Equine Odontoclastic Tooth Resorption and Hypercementosis (EOTRH) syndrome. When features differed significantly ( $p < 0.05$ ).

| Feature | EOTRH | 0        | 1      | 2      | 3      |
|---------|-------|----------|--------|--------|--------|
| GLN     | Mean  | 7.03     | 6.68   | 7.25   | 6.55   |
|         | SD    | 2.42     | 2.53   | 2.81   | 2.20   |
|         | p     | 0.2156   | a      | a      | a      |
| GLNN    | Mean  | 0.26     | 0.26   | 0.25   | 0.23   |
|         | SD    | 0.05     | 0.06   | 0.04   | 0.06   |
|         | p     | 0.0004   | a      | a      | b      |
| GLV     | Mean  | 1.52     | 1.78   | 1.78   | 2.14   |
|         | SD    | 0.42     | 0.51   | 0.52   | 0.68   |
|         | p     | < 0.0001 | a      | b      | c      |
| HGLZE   | Mean  | 10.5     | 10.9   | 11.3   | 14.5   |
|         | SD    | 3.6      | 3.4    | 3.8    | 6.0    |
|         | p     | < 0.0001 | a      | a      | b      |
| LAE     | Mean  | 41085    | 39862  | 45789  | 39009  |
|         | SD    | 29146    | 36290  | 42248  | 34781  |
|         | p     | 0.0966   | a      | a      | a      |
| LAHGLE  | Mean  | 444818   | 583410 | 667443 | 676123 |
|         | SD    | 387918   | 663489 | 659453 | 613267 |
|         | p     | 0.0054   | a      | ab     | b      |
| LALGLE  | Mean  | 5045     | 3388   | 4048   | 2849   |
|         | SD    | 3765     | 3076   | 3982   | 2966   |
|         | p     | < 0.0001 | a      | b      | b      |
| LGLZE   | Mean  | 0.26     | 0.26   | 0.25   | 0.21   |
|         | SD    | 0.12     | 0.11   | 0.11   | 0.10   |
|         | p     | 0.0017   | a      | a      | b      |
| SZN     | Mean  | 2.98     | 2.71   | 2.93   | 2.56   |
|         | SD    | 1.44     | 1.24   | 1.34   | 1.10   |
|         | p     | 0.144    | a      | a      | a      |
| SZNN    | Mean  | 0.11     | 0.11   | 0.10   | 0.09   |
|         | SD    | 0.04     | 0.04   | 0.03   | 0.03   |
|         | p     | 0.007    | a      | a      | b      |
| SAE     | Mean  | 0.25     | 0.24   | 0.23   | 0.21   |
|         | SD    | 0.10     | 0.10   | 0.09   | 0.09   |
|         | p     | 0.2691   | a      | a      | a      |
| SAHGLE  | Mean  | 2.08     | 1.83   | 1.95   | 2.31   |
|         | SD    | 1.35     | 1.00   | 1.14   | 1.62   |
|         | p     | 0.3829   | a      | a      | a      |
| SALGLE  | Mean  | 0.08     | 0.09   | 0.08   | 0.06   |
|         | SD    | 0.07     | 0.06   | 0.05   | 0.05   |
|         | p     | 0.0005   | ab     | a      | b      |
| ZE      | Mean  | 4.24     | 4.25   | 4.40   | 4.46   |
|         | SD    | 0.46     | 0.49   | 0.45   | 0.48   |
|         | p     | 0.002    | ab     | a      | c      |
| ZP      | Mean  | 0.0147   | 0.0160 | 0.0148 | 0.0159 |
|         | SD    | 0.0043   | 0.0050 | 0.0049 | 0.0061 |
|         | p     | 0.0569   | a      | a      | a      |
| ZV      | Mean  | 35147    | 34515  | 39587  | 32916  |
|         | SD    | 26440    | 33052  | 38627  | 30537  |
|         | p     | 0.1199   | a      | a      | a      |

GLN - gray level non-uniformity; GLNN - gray level non-uniformity normalized; GLV - gray level variance; HGLZE - high gray level zone emphasis; LAE - large area emphasis; LAHGLE - large area high gray level emphasis; LALGLE - large area low gray level emphasis; LGLZE - low gray level zone emphasis; SZN - size-zone non-uniformity; SZNN - size-zone non-uniformity normalized; SAE - small area emphasis; SAHGLE - small area high gray level emphasis; SALGLE - small area low gray level emphasis; ZE - zone entropy; ZP - zone percentage; ZV - zone variance. Lower case letters (a-c) indicate differences between classes for  $p < 0.05$  independently for each feature.
